# Supplementary material for: Elemental tellurium mediated synthesis of 2-(trifluoromethyl)oxazoles using trifluoroacetic anhydride as reagent
Source: Royal Society of Chemistry journal article supplement (doi:10.1039/c8cc05670f), 2018-01-01

**Supporting Information for**  
**Elemental tellurium mediated synthesis 2-(trifluoromethyl)oxazoles**  
**using trifluoroacetic anhydride as reagent**

Beibei Luo, and Zhiqiang Weng\*

State Key Laboratory of Photocatalysis on Energy and Environment, College of  
Chemistry, Fuzhou University, Fujian 350108, China.

E-mail: [zweng@fzu.edu.cn](mailto:zweng@fzu.edu.cn)

**Table of Contents**

|                                                                                                                |    |
|----------------------------------------------------------------------------------------------------------------|----|
| General information.....                                                                                       | 2  |
| General procedure for preparation of oxime acetates substrates.....                                            | 3  |
| General procedure of the tellurium-mediated synthesis of<br>2-(trifluoromethyl)oxazoles.....                   | 4  |
| Procedure for the synthesis of 4-phenyl-2-(trifluoromethyl)oxazole ( <b>3a</b> ) on a 10.0<br>mmol scale. .... | 5  |
| Experiments for Mechanistic Investigations.....                                                                | 6  |
| The procedure for the biological assay.....                                                                    | 10 |
| Data for compounds <b>3</b> .....                                                                              | 14 |
| Crystal structure analyses.....                                                                                | 29 |
| References.....                                                                                                | 31 |
| Copies of <sup>1</sup> H NMR, <sup>19</sup> F NMR and <sup>13</sup> C NMR spectra.....                         | 32 |

## General information

$^1\text{H}$  NMR,  $^{19}\text{F}$  NMR and  $^{13}\text{C}$  NMR spectra were recorded using Bruker AVIII 400 spectrometer.  $^1\text{H}$  NMR and  $^{13}\text{C}$  NMR chemical shifts were reported in parts per million (ppm) downfield from tetramethylsilane and  $^{19}\text{F}$  NMR chemical shifts were determined relative to  $\text{CFCl}_3$  as the external standard and low field is positive. Coupling constants ( $J$ ) are reported in Hertz (Hz). The residual solvent peak was used as an internal reference:  $^1\text{H}$  NMR (chloroform  $\delta$  7.26) and  $^{13}\text{C}$  NMR (chloroform  $\delta$  77.0). The following abbreviations were used to explain the multiplicities: s = singlet, d = doublet, t = triplet, q = quartet, m = multiplet, br = broad. HRMS were obtained on Waters GCT-TOF at the Shanghai Institute of Organic Chemistry and State Key Discipline Testing Center for Physical Chemistry of Fuzhou University. Reagents were received from commercial sources. Solvents were freshly dried and degassed according to the published procedures prior to use. Column chromatography purifications were performed by flash chromatography using Merck silica gel 60.

### General procedure for preparation of oxime acetate substrates

Oxime acetates were synthesized according to the published procedures:<sup>1-6</sup>

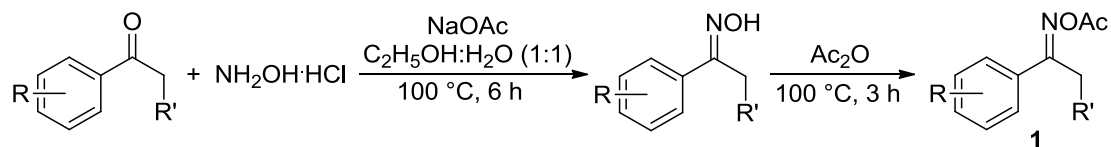

To a solution of aromatic ketones (2 mmol) in the mixture of C<sub>2</sub>H<sub>5</sub>OH/H<sub>2</sub>O (v/v = 1:1) was added hydroxylamine hydrochloride (2.2 mmol), NaOAc (3 mmol) in one portion, and the reaction mixture was stirred at 100 °C for 6 h. Upon completion of the reaction as indicated by TLC, the reaction mixture was diluted with water, and extracted with ethyl acetate (15 mL × 3), dried over MgSO<sub>4</sub>. The solvent was removed under reduced pressure to give oximes.

The mixture of aromatic ketoxime (2.0 mmol), anhydride (4.0 mmol) was stirred at 100 °C for 3 h. Upon completion of the reaction as indicated by TLC, the reaction mixture was diluted with water, and extracted with ethyl acetate (15 mL × 3), dried over MgSO<sub>4</sub>. The solvent was removed by rotary evaporation and the resulting product was purified by column chromatography over silica gel with hexanes as the eluent to afford aromatic ketoxime acetates.

**General procedure of the tellurium-mediated synthesis of  
2-(trifluoromethyl)oxazoles**

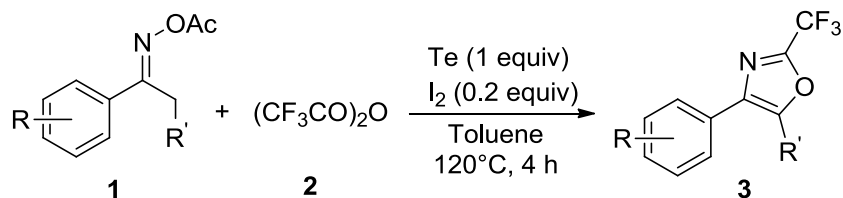

The aromatic ketoxime acetates derivatives (**1**) (1.0 mmol), trifluoroacetic anhydride (**2**) (2.0 mmol, 2.0 equiv), Te (1.0 mmol, 1.0 equiv), I<sub>2</sub> (0.2 mmol, 0.2 equiv), and toluene (4.0 mL) were added to a oven-dried 25.0 mL test tube with Teflon screw cap. The tube was sealed and the mixture solution was placed into a preheated 120 °C oil bath for 4 h. The tube was removed from the oil bath and cooled to r.t. The reaction mixture was diluted with ethyl acetate (15 mL × 3), washed with saturated sodium bicarbonate (30 mL), and water (20 mL), dried over MgSO<sub>4</sub>. The solvent was removed by rotary evaporation and the resulting crude product **3** was purified by column chromatography over silica gel (*n*-pentanes).

**Procedure for the synthesis of 4-phenyl-2-(trifluoromethyl)oxazole (3a) on a 10.0 mmol scale**

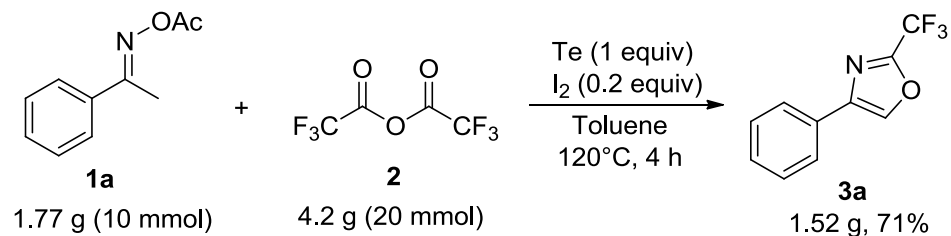

The acetophenone oxime acetate (**1a**) (1.77 g, 10.0 mmol), trifluoroacetic anhydride (**2**) (2.8 mL, 4.20 g, 20.0 mmol, 2.0 equiv), Te (1.30 g, 10.0 mmol), I<sub>2</sub> (0.50 g, 2.0 mmol), and toluene (40.0 mL) were added to a oven-dried 100 mL test tube with Teflon screw cap. The tube was sealed and the mixture solution was placed into a preheated 120 °C oil bath for 4 h. The tube was removed from the oil bath and cooled to r.t. The reaction mixture was diluted with ethyl acetate (40 mL × 5), washed with saturated sodium bicarbonate (500 mL), and water (200 mL), dried over MgSO<sub>4</sub>. The solvent was removed by rotary evaporation and the crude product was purified by column chromatography over silica gel (*n*-pentanes). The product 4-phenyl-2-(trifluoromethyl)oxazole (**3a**) was isolated as a white solid in 71% (1.52 g).

## Experiments for Mechanistic Investigations

### (a) Competition reaction of ketoxime acetates derivatives **1ad** and **1ag** with **2**.

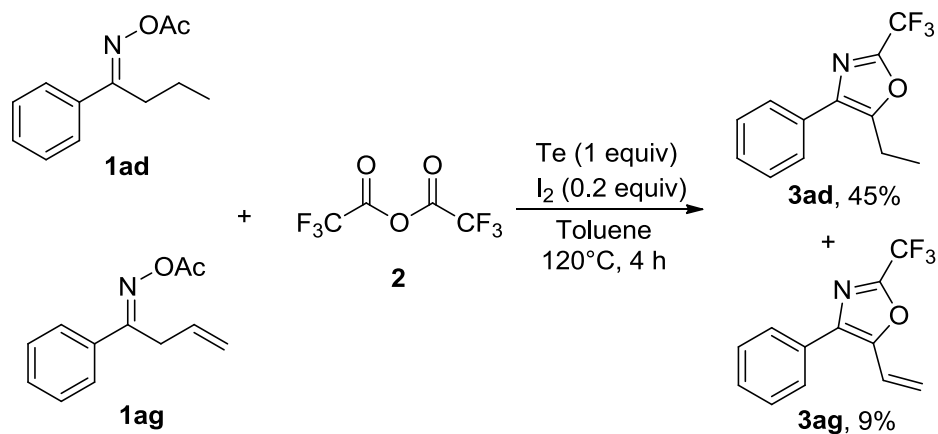

The aromatic ketoxime acetates derivatives **1ad** (17.7 mg, 0.10 mmol), **1ag** (21.7 mg, 0.10 mmol), trifluoroacetic anhydride (**2**) (42  $\mu$ L, 63 mg, 0.30 mmol), Te (13 mg, 0.10 mmol), I<sub>2</sub> (5.0 mg, 0.020 mmol), and 1.0 mL toluene were added to a oven-dried 5 mL test tube with Teflon screw cap. The tube was sealed and the mixture solution was placed into a preheated 120 °C oil bath for 4 h. The tube was removed from the oil bath and cooled to r.t. 10  $\mu$ L (Trifluoromethoxy)benzene was then added as an internal standard. The reaction mixture was filtered through a layer of celite. The filtrate was analyzed by <sup>19</sup>F NMR and GC-MS, and the products **3ad** and **3ag** were calculated to be 45% and 9%, respectively.

**(b) Procedure for the reaction of acetophenone oxime acetate (1a) with trifluoroacetic anhydride (2) mediated by tellurium in the presence of 2.0 equiv TEMPO**

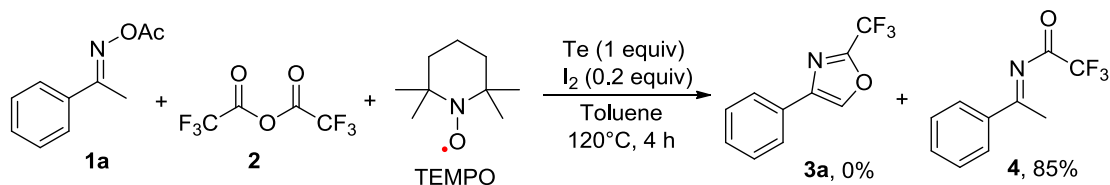

In a dry-box, acetophenone oxime acetate (**1a**) (177 mg, 1.0 mmol), trifluoroacetic anhydride (**2**) (280  $\mu$ L, 420 mg, 2.0 mmol, 2.0 equiv), Te (130 mg, 1.0 mmol, 1.0 equiv), I<sub>2</sub> (50 mg, 0.20 mmol, 0.20 equiv), TEMPO (312 mg, 2.0 mmol, 2.0 equiv), and 1.0 mL toluene were added to a oven-dried 5 mL test tube with Teflon screw cap. The tube was sealed and the mixture solution was placed into a preheated 120 °C oil bath for 4 h. The tube was removed from the oil bath and cooled to r.t. 10  $\mu$ L (Trifluoromethoxy)benzene was then added as an internal standard. The reaction mixture was filtered through a layer of celite. The filtrate was analyzed by <sup>19</sup>F NMR and GC-MS, and no trace of 4-phenyl-2-(trifluoromethyl)oxazole (**3a**) was detected. Compound 2,2,2-trifluoro-*N*-(1-phenylethylidene)acetamide (**4**) was formed in 85% NMR yield.

**(c) Procedure for the reaction of acetophenone oxime acetate (1a) with trifluoroacetic anhydride mediated by tellurium in the presence of 2.0 equiv BHT**

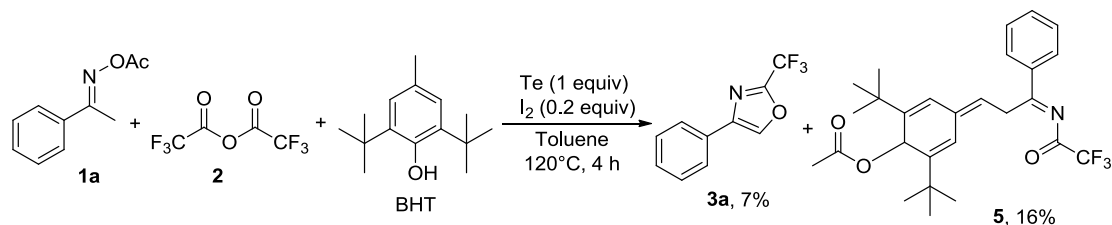

In a dry-box, acetophenone oxime acetate (**1a**) (177 mg, 1.0 mmol), trifluoroacetic anhydride (**2**) (280  $\mu$ L, 420 mg, 2.0 mmol, 2.0 equiv), Te (130 mg, 1.0 mmol, 1.0 equiv), I<sub>2</sub> (50 mg, 0.20 mmol, 0.20 equiv), BHT (441 mg, 2.0 mmol, 2.0 equiv), and 4.0 mL toluene were added to a oven-dried 25 mL test tube with Teflon screw cap. The tube was sealed and the mixture solution was placed into a preheated 120 °C oil bath for 4 h. The tube was removed from the oil bath and cooled to r.t. 10  $\mu$ L (Trifluoromethoxy)benzene was then added as an internal standard. The reaction mixture was filtered through a layer of celite. The filtrate was analyzed by <sup>19</sup>F NMR and GC-MS, and the yields of 4-phenyl-2-(trifluoromethyl)oxazole (**3a**) and BHT-adduct (**5**) were calculated to be 7% and 16%, respectively.

The reaction mixture was diluted with ethyl acetate (15 mL  $\times$  3), washed with saturated sodium bicarbonate (30 mL), and water (20 mL), dried over MgSO<sub>4</sub>. The solvent was removed by rotary evaporation and the resulting product **7** was purified by column chromatography over silica gel (*n*-pentane/ethyl acetate = 10:1). *N*-(2-(2,6-di-*tert*-butyl-4-methylphenoxy)-1-phenylethylidene)-2,2,2-trifluoroacetamide (**5**): Obtained as a light yellow solid. M.p. 141–142 °C. *R*<sub>f</sub> (*n*-pentane/ethyl acetate = 10:1) = 0.52. <sup>1</sup>H NMR (400 MHz, CDCl<sub>3</sub>)  $\delta$  7.47 – 7.35 (m, 6H), 7.22 (s, 2H), 6.26 (t, *J* = 7.2 Hz, 1H), 3.50 (d, *J* = 7.0 Hz, 2H), 2.38 (s, 3H), 1.38 (s, 18H). <sup>19</sup>F NMR (376 MHz, CDCl<sub>3</sub>)  $\delta$  -75.1 (s, 3F). <sup>13</sup>C NMR (101 MHz, CDCl<sub>3</sub>)  $\delta$  171.3 (s), 155.3 (q, *J* = 37.0 Hz), 146.6 (s), 142.7 (s), 136.0 (s), 135.8 (s), 131.2 (s), 128.8 (s), 128.7 (s), 127.2 (s), 126.6 (s), 125.6 (s), 115.9 (q, *J* = 289.1 Hz), 35.4 (s), 34.5 (s), 31.5 (s), 22.7 (s). IR (KBr):  $\nu$  3277, 2964, 2165, 2034, 1717, 1526, 1483, 1425, 1367, 1203, 1164,



804, 758, 694, 515  $\text{cm}^{-1}$ . GC-MS  $m/z$  475 ( $\text{M}^+$ ). HRMS (EI)  $m/z$ : calcd. for  $\text{C}_{27}\text{H}_{32}\text{F}_3\text{NO}_3$ : 475.2334; found: 475.2324.

### A proposed reaction pathway for the formation of 5

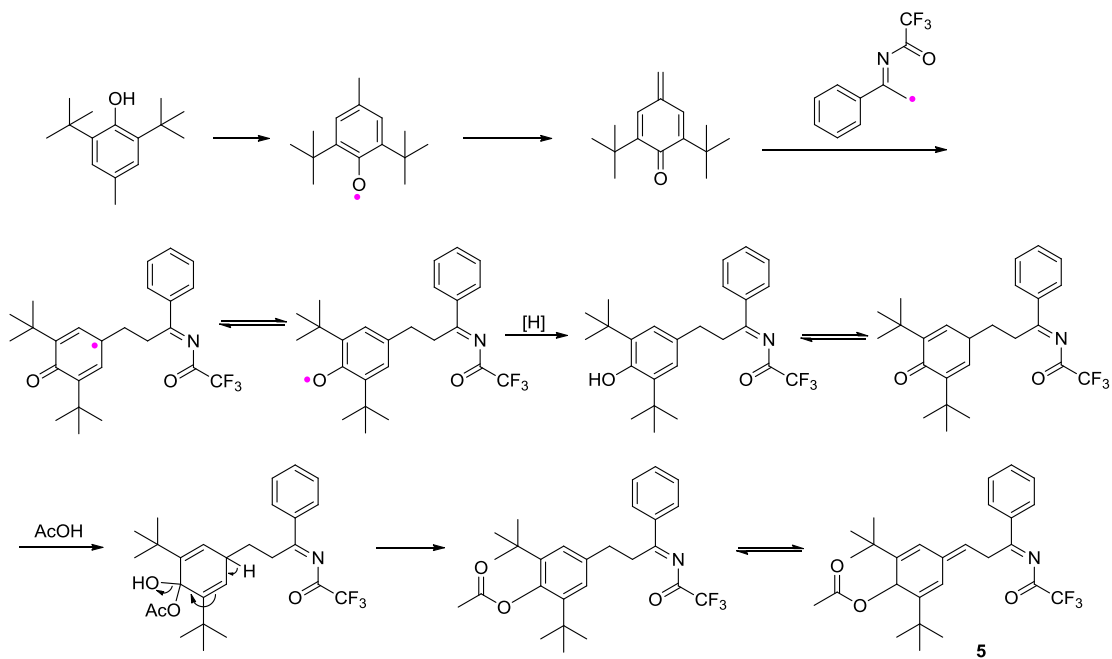

## **The procedure for the biological assay**

### **Evaluations of fungicidal activities of the synthesized compounds:**

Each of the test compounds (4 mg) was first dissolved in 5 mL of mixture of acetone and methanol (1:1 by volume), and then 5 mL of water containing 0.1% Tween 80 was added to generate a 10 mL stock solution of 400 mg/L concentration.

Briefly, a whole plant is used in this test, and the testing solution is sprayed to the host plant by a special plant sprayer. The plant is inoculated with fungus after 24 h. According to the infecting characteristics of fungus, the plant is stored in a humidity chamber and then transferred into a greenhouse after infection is finished. The other plants are placed in a greenhouse directly. The activity of each compound was estimated by visual inspection after 7 days, and screening results were reported as a range from 0% (no control) to 100% (complete control).

**The general screening of the title compounds on bactericidal activity**

| compound                                                                                       | bactericidal activity (% control at the concentration of 400 mg/L) |     |     |     |
|------------------------------------------------------------------------------------------------|--------------------------------------------------------------------|-----|-----|-----|
|                                                                                                | CDM                                                                | WPM | CSR | CA  |
| 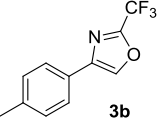 <b>3b</b>    | 0                                                                  | 0   | 0   | 0   |
|  <b>3h</b>    | 0                                                                  | 60  | 20  | 0   |
|  <b>3s</b>    | 0                                                                  | 30  | 0   | 0   |
|  <b>3t</b>   | 0                                                                  | 0   | 60  | 0   |
|  <b>3ad</b> | 0                                                                  | 0   | 75  | 0   |
|  <b>3af</b> | 0                                                                  | 0   | 40  | 0   |
| Mancozeb<br>(25 mg/L)                                                                          | 90                                                                 | -   | -   | -   |
| Azoxystrobin<br>(25 mg/L)                                                                      | -                                                                  | 100 | 100 | 100 |

CDM = cucumber downy mildew; WPM = wheat powdery mildew; CSR = corn rust;

CA = cucumber anthracnose

**Insecticidal activities:**

Each of the test compounds was first dissolved in 5 mL of mixture of acetone and methanol (1:1 by volume), and then 5 mL of water containing 0.1% Tween 80 was added to generate a 10 mL stock solution of 600 mg/L concentration.

The cabbage leaves were cut into small circular pieces ( $\phi = 30$  mm), and placed on the glass Petri dishes ( $\phi = 60$  mm) layered with filter papers that had been wet with sterilized distilled water. The cabbage leaves were sprayed with the aforementioned solutions using an Airbrush sprayer (dosage 0.5 mL). After they were air dried, the third-instar insects were introduced to the cabbage leaves. They were kept in a special room for normal cultivation (temperature: 23-25 °C; RH: 40-60%, L/D: 13 h/11 h). Assessments were made after 72 h by the number of killed and size of live insects relative to that in the negative control, and evaluations were based on a percentage scale of 0-100, in which 100 was total kill and 0 was no activity. To compare their activities, the commercial products abamectin and imidacloprid were tested at the concentration of 10 mg/L under the same conditions.

For the insecticidal activities against leucania separate, the corn leaf disks (2 mm  $\times$  5 mm) were used instead of the cabbage leaves.

**The general screening of the title compounds on insecticidal activity**

| compound                                                                                       | insecticidal activity (% mortality at the concentration of 600 mg/L) |                   |                |                          |
|------------------------------------------------------------------------------------------------|----------------------------------------------------------------------|-------------------|----------------|--------------------------|
|                                                                                                | plutella xylostella                                                  | leucania separate | myzus persicae | tetranychus cinnabarinus |
| 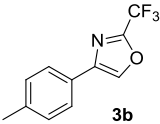 <b>3b</b>    | 0                                                                    | 0                 | 0              | 0                        |
|  <b>3h</b>    | 0                                                                    | 0                 | 0              | 0                        |
|  <b>3s</b>    | 0                                                                    | 0                 | 0              | 0                        |
|  <b>3t</b>  | 42.9                                                                 | 0                 | 0              | 0                        |
|  <b>3ad</b> | 0                                                                    | 0                 | 0              | 0                        |
|  <b>3af</b> | 16.7                                                                 | 0                 | 0              | 0                        |
| 96.2% Abamectin<br>(10 mg/L)                                                                   | 100                                                                  | 100               | -              | 100                      |
| 96% Imidacloprid<br>(10 mg/L)                                                                  | -                                                                    | -                 | 100            | -                        |

### Data for compounds 3.

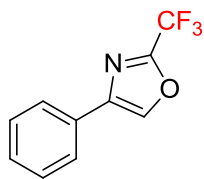

#### 4-Phenyl-2-(trifluoromethyl)oxazole (3a)

Obtained as a white solid in 95% yield (202 mg). M.p. 51–52 °C.  $R_f$  (*n*-pentane) = 0.75.  $^1\text{H}$  NMR (400 MHz,  $\text{CDCl}_3$ )  $\delta$  8.03 (s, 1H), 7.79 (d,  $J = 7.6$  Hz, 2H), 7.53 – 7.37 (m, 3H).  $^{19}\text{F}$  NMR (376 MHz,  $\text{CDCl}_3$ )  $\delta$  -65.9 (s, 3F).  $^{13}\text{C}$  NMR (101 MHz,  $\text{CDCl}_3$ )  $\delta$  150.9 (q,  $J = 44.0$  Hz), 142.1 (s), 135.4 (q,  $J = 1.2$  Hz), 129.2 (s), 129.1 (s), 128.9 (s), 125.8 (s), 116.5 (q,  $J = 270.7$  Hz). IR (KBr):  $\nu$  1598, 1580, 1486, 1450, 1378, 1243, 1155, 1125, 938, 754, 691, 548  $\text{cm}^{-1}$ . GC-MS  $m/z$  213 ( $\text{M}^+$ ). HRMS (ESI)  $m/z$ : calcd. for  $\text{C}_{10}\text{H}_6\text{F}_3\text{NO}$ : 213.0401; found: 213.0399.

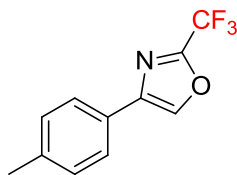

#### 4-(*p*-Tolyl)-2-(trifluoromethyl)oxazole (3b)

Obtained as a white solid in 98% yield (222 mg). M.p. 76–77 °C.  $R_f$  (*n*-pentane) = 0.69.  $^1\text{H}$  NMR (400 MHz,  $\text{CDCl}_3$ )  $\delta$  8.00 (s, 1H), 7.68 (d,  $J = 8.2$  Hz, 2H), 7.28 (d,  $J = 8.2$  Hz, 2H), 2.42 (s, 3H).  $^{19}\text{F}$  NMR (376 MHz,  $\text{CDCl}_3$ )  $\delta$  -65.8 (s, 3F).  $^{13}\text{C}$  NMR (101 MHz,  $\text{CDCl}_3$ )  $\delta$  150.9 (q,  $J = 43.9$  Hz), 142.1 (s), 139.1 (s), 134.9 (q,  $J = 1.2$  Hz), 129.6 (s), 126.4 (s), 125.7 (s), 116.5 (q,  $J = 270.6$  Hz), 21.3 (s). IR (KBr):  $\nu$  2177, 2141, 2055, 1980, 1582, 1379, 1207, 1160, 954, 902, 822, 769, 545, 476  $\text{cm}^{-1}$ . GC-MS  $m/z$  227 ( $\text{M}^+$ ). HRMS (EI)  $m/z$ : calcd. for  $\text{C}_{11}\text{H}_8\text{F}_3\text{NO}$ : 227.0558; found: 227.0559.

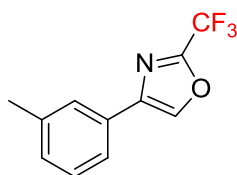

#### 4-(*m*-Tolyl)-2-(trifluoromethyl)oxazole (3c)

Obtained as a white solid in 82% yield (186mg). M.p. 30–31 °C.  $R_f$  (*n*-pentane) = 0.65.  $^1\text{H}$  NMR (400 MHz,  $\text{CDCl}_3$ )  $\delta$  8.01 (s, 1H), 7.64 (s, 1H), 7.57 (d,  $J = 7.7$  Hz, 1H), 7.36 (t,  $J = 7.6$  Hz, 1H), 7.23 (d,  $J = 7.6$  Hz, 1H), 2.44 (s, 3H).  $^{19}\text{F}$  NMR (376 MHz,  $\text{CDCl}_3$ )  $\delta$  -65.9 (s, 3F).  $^{13}\text{C}$  NMR (101 MHz,  $\text{CDCl}_3$ )  $\delta$  150.9 (q,  $J = 44.0$  Hz), 142.2 (s), 138.8 (s), 135.4 (q,  $J = 1.2$  Hz), 129.9 (s), 129.1 (s), 128.8 (s), 126.5 (s), 122.9 (s), 116.5 (q,  $J = 270.7$  Hz), 21.3 (s). IR (KBr):  $\nu$  2815, 2213, 1585, 1377, 1243, 1207, 1159, 1126, 1106, 951, 836, 769, 548  $\text{cm}^{-1}$ . GC-MS  $m/z$  227 ( $\text{M}^+$ ). HRMS (EI)  $m/z$ : calcd. for  $\text{C}_{11}\text{H}_8\text{F}_3\text{NO}$ : 227.0558; found: 227.0548.

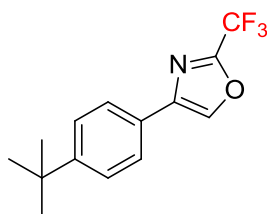

#### 4-(4-(*tert*-Butyl)phenyl)-2-(trifluoromethyl)oxazole (3d)

Obtained as a white liquid in 97% yield (261 mg).  $R_f$  (*n*-pentane) = 0.75.  $^1\text{H}$  NMR (400 MHz,  $\text{CDCl}_3$ )  $\delta$  8.01 (s, 1H), 7.78 – 7.67 (m, 2H), 7.53 – 7.47 (m, 2H), 1.40 (s, 9H).  $^{19}\text{F}$  NMR (376 MHz,  $\text{CDCl}_3$ )  $\delta$  -65.8 (s, 3F).  $^{13}\text{C}$  NMR (101 MHz,  $\text{CDCl}_3$ )  $\delta$  152.4 (s), 150.9 (q,  $J = 44.0$  Hz), 142.1 (s), 135.1 (q,  $J = 1.2$  Hz), 126.4 (s), 125.9 (s), 125.6 (s), 116.5 (q,  $J = 270.7$  Hz), 34.8 (s), 31.2 (s). IR (KBr):  $\nu$  2965, 2789, 2205, 1597, 1498, 1378, 1244, 1204, 1156, 954, 939, 755, 557  $\text{cm}^{-1}$ . GC-MS  $m/z$  269 ( $\text{M}^+$ ). HRMS (EI)  $m/z$ : calcd. for  $\text{C}_{14}\text{H}_{14}\text{F}_3\text{NO}$ : 269.1027; found: 269.1029.

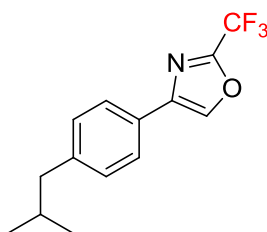

#### 4-(4-Isobutylphenyl)-2-(trifluoromethyl)oxazole (3e)

Obtained as a white solid in 79% yield (213 mg). M.p. 40–41 °C.  $R_f$  (*n*-pentane) = 0.69.  $^1\text{H}$  NMR (400 MHz,  $\text{CDCl}_3$ )  $\delta$  7.99 (s, 1H), 7.70 (d,  $J = 8.1$  Hz, 2H), 7.25 (d,  $J$

= 8.1 Hz, 2H), 2.55 (d,  $J = 7.2$  Hz, 2H), 1.93 (dp,  $J = 13.6, 6.8$  Hz, 1H), 0.97 (d,  $J = 6.6$  Hz, 6H).  $^{19}\text{F}$  NMR (376 MHz,  $\text{CDCl}_3$ )  $\delta$  -65.9 (s, 3F).  $^{13}\text{C}$  NMR (101 MHz,  $\text{CDCl}_3$ )  $\delta$  150.9 (q,  $J = 44.0$  Hz), 142.9 (s), 142.2 (s), 135.0 (q,  $J = 1.2$  Hz), 129.7 (s), 126.7 (s), 125.6 (s), 116.6 (q,  $J = 270.6$  Hz), 45.2 (s), 30.2 (s), 22.3 (s). IR (KBr):  $\nu$  2957, 2870, 1597, 1465, 1378, 1301, 1242, 1156, 1125, 1103, 953, 798, 767, 532  $\text{cm}^{-1}$ . GC-MS  $m/z$  269 ( $\text{M}^+$ ). HRMS (EI)  $m/z$ : calcd. for  $\text{C}_{14}\text{H}_{14}\text{F}_3\text{NO}$ : 269.1027; found: 269.1033.

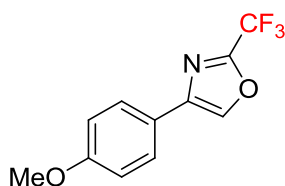

#### 4-(4-Methoxyphenyl)-2-(trifluoromethyl)oxazole (3f)

Obtained as a white solid in 71% yield (173 mg). M.p. 68–69 °C.  $R_f$  ( $n$ -pentane/ethyl acetate = 15:1) = 0.63.  $^1\text{H}$  NMR (400 MHz,  $\text{CDCl}_3$ )  $\delta$  7.96 (s, 1H), 7.71 (d,  $J = 8.5$  Hz, 2H), 6.99 (d,  $J = 8.5$  Hz, 2H), 3.87 (s, 3H).  $^{19}\text{F}$  NMR (376 MHz,  $\text{CDCl}_3$ )  $\delta$  -65.8 (s, 3F).  $^{13}\text{C}$  NMR (101 MHz,  $\text{CDCl}_3$ )  $\delta$  160.3 (s), 150.8 (q,  $J = 44.0$  Hz), 141.9 (s), 134.4 (q,  $J = 1.3$  Hz), 127.2 (s), 121.8 (s), 116.5 (q,  $J = 270.6$  Hz), 114.4 (s), 55.3 (s). IR (KBr):  $\nu$  2788, 2253, 2150, 1619, 1502, 1380, 1255, 1207, 1162, 939, 835, 635, 546  $\text{cm}^{-1}$ . GC-MS  $m/z$  243 ( $\text{M}^+$ ). HRMS (EI)  $m/z$ : calcd. for  $\text{C}_{11}\text{H}_8\text{F}_3\text{NO}_2$ : 243.0507; found: 243.0508.

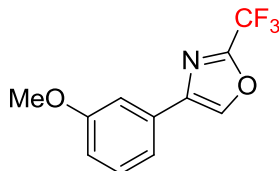

#### 4-(3-Methoxyphenyl)-2-(trifluoromethyl)oxazole (3g)

Obtained as a white solid in 62% yield (151 mg). M.p. 34–35 °C.  $R_f$  ( $n$ -pentane/ethyl acetate = 15:1) = 0.59.  $^1\text{H}$  NMR (400 MHz,  $\text{CDCl}_3$ )  $\delta$  8.04 (s, 1H), 7.42 – 7.31 (m, 3H), 6.96 (d,  $J = 7.2$  Hz, 1H), 3.90 (s, 3H).  $^{19}\text{F}$  NMR (376 MHz,  $\text{CDCl}_3$ )  $\delta$  -65.8 (s, 3F).  $^{13}\text{C}$  NMR (101 MHz,  $\text{CDCl}_3$ )  $\delta$  160.1 (s), 150.9 (q,  $J = 44.1$  Hz), 142.0 (s), 135.6



(q,  $J = 1.2$  Hz), 130.5 (s), 130.0 (s), 118.2 (s), 116.5 (q,  $J = 270.8$  Hz), 114.9 (s), 111.2 (s), 55.4 (s). IR (KBr):  $\nu$  2927, 1583, 1490, 1466, 1377, 1320, 1288, 1246, 1159, 952, 838, 771, 549  $\text{cm}^{-1}$ . GC-MS  $m/z$  243 ( $\text{M}^+$ ). HRMS (EI)  $m/z$ : calcd. for  $\text{C}_{11}\text{H}_8\text{F}_3\text{NO}_2$ : 243.0507; found: 243.0500.

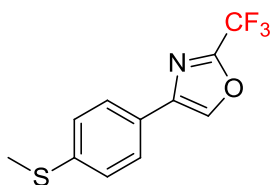

#### 4-(4-(Methylthio)phenyl)-2-(trifluoromethyl)oxazole (3h)

Obtained as a white solid in 73% yield (189 mg). M.p. 94–95 °C.  $R_f$  (*n*-pentane) = 0.40.  $^1\text{H}$  NMR (400 MHz,  $\text{CDCl}_3$ )  $\delta$  8.02 (s, 1H), 7.70 (d,  $J = 8.2$  Hz, 2H), 7.32 (d,  $J = 8.2$  Hz, 2H), 2.54 (s, 3H).  $^{19}\text{F}$  NMR (376 MHz,  $\text{CDCl}_3$ )  $\delta$  -65.8 (s, 3F).  $^{13}\text{C}$  NMR (101 MHz,  $\text{CDCl}_3$ )  $\delta$  150.9 (q,  $J = 44.2$  Hz), 141.7 (s), 140.0 (s), 135.1 (q,  $J = 0.9$  Hz), 126.5 (s), 126.2 (s), 125.8 (s), 116.5 (q,  $J = 270.6$  Hz), 15.5 (s). IR (KBr):  $\nu$  3152, 3126, 2919, 2323, 1989, 1611, 1591, 1487, 1380, 1256, 1153, 954, 863, 756, 497  $\text{cm}^{-1}$ . GC-MS  $m/z$  259 ( $\text{M}^+$ ). HRMS (EI)  $m/z$ : calcd. for  $\text{C}_{11}\text{H}_8\text{F}_3\text{NOS}$ : 259.0279; found: 259.0284.

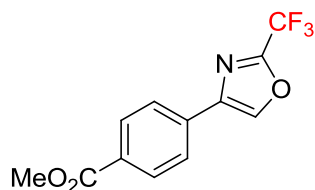

#### Methyl 4-(2-(trifluoromethyl)oxazol-4-yl)benzoate (3i)

Obtained as a white solid in 45% yield (122 mg). M.p. 96–97 °C.  $R_f$  (*n*-pentane/ethyl acetate = 15:1) = 0.50.  $^1\text{H}$  NMR (400 MHz,  $\text{CDCl}_3$ )  $\delta$  8.17 – 8.11 (m, 3H), 7.87 (d,  $J = 8.3$  Hz, 2H), 3.97 (s, 3H).  $^{19}\text{F}$  NMR (376 MHz,  $\text{CDCl}_3$ )  $\delta$  -65.9 (s, 3F).  $^{13}\text{C}$  NMR (101 MHz,  $\text{CDCl}_3$ )  $\delta$  166.5 (s), 151.2 (q,  $J = 44.3$  Hz), 141.2 (s), 136.6 (q,  $J = 1.2$  Hz), 133.4 (s), 130.5 (s), 130.3 (s), 125.7 (s), 116.3 (q,  $J = 270.9$  Hz), 52.3 (s). IR (KBr):  $\nu$  3126, 2960, 2920, 2852, 1709, 1616, 1594, 1475, 1381, 1284, 1134, 956, 862, 774,

507  $\text{cm}^{-1}$ . GC-MS  $m/z$  271 ( $\text{M}^+$ ). HRMS (EI)  $m/z$ : calcd. for  $\text{C}_{12}\text{H}_8\text{F}_3\text{NO}_3$ : 271.0456; found: 271.0457.

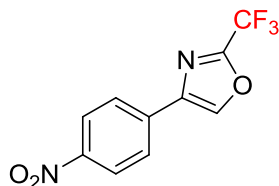

#### 4-(4-Nitrophenyl)-2-(trifluoromethyl)oxazole (3j)

Obtained as a deep red solid in 40% yield (103 mg). M.p. 118–119 °C.  $R_f$  (*n*-pentane/ethyl acetate = 15:1) = 0.58.  $^1\text{H}$  NMR (400 MHz,  $\text{CDCl}_3$ )  $\delta$  8.33 (d,  $J$  = 8.8 Hz, 2H), 8.24 (s, 1H), 7.98 (d,  $J$  = 8.8 Hz, 2H).  $^{19}\text{F}$  NMR (376 MHz,  $\text{CDCl}_3$ )  $\delta$  -65.9 (s, 3F).  $^{13}\text{C}$  NMR (101 MHz,  $\text{CDCl}_3$ )  $\delta$  151.6 (q,  $J$  = 44.6 Hz), 148.0 (s), 140.2 (s), 137.3 (q,  $J$  = 1.0 Hz), 135.4 (s), 126.5 (s), 124.4 (s), 116.2 (q,  $J$  = 271.1 Hz). IR (KBr):  $\nu$  3126, 2919, 2163, 2074, 1591, 1519, 1417, 1343, 1207, 1137, 939, 854, 718, 695  $\text{cm}^{-1}$ . GC-MS  $m/z$  258 ( $\text{M}^+$ ). HRMS (EI)  $m/z$ : calcd. for  $\text{C}_{10}\text{H}_5\text{F}_3\text{N}_2\text{O}_3$ : 258.0252; found: 258.0247.

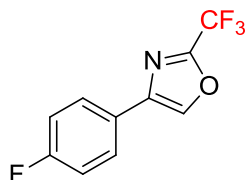

#### 4-(4-Fluorophenyl)-2-(trifluoromethyl)oxazole (3k)

Obtained as a white solid in 58% yield (135 mg). M.p. 35–36 °C.  $R_f$  (*n*-pentane/ethyl acetate = 15:1) = 0.65.  $^1\text{H}$  NMR (400 MHz,  $\text{CDCl}_3$ )  $\delta$  8.01 (s, 1H), 7.76 (dd,  $J$  = 8.5, 5.4 Hz, 2H), 7.16 (t,  $J$  = 8.6 Hz, 2H).  $^{19}\text{F}$  NMR (376 MHz,  $\text{CDCl}_3$ )  $\delta$  -65.9 (s, 3F), -111.7 – -111.9 (m, 1F).  $^{13}\text{C}$  NMR (101 MHz,  $\text{CDCl}_3$ )  $\delta$  164.4 (s), 161.9 (s), 151.0 (q,  $J$  = 44.2 Hz), 141.3 (s), 135.1 (s), 127.7 (d,  $J$  = 8.3 Hz), 125.4 (d,  $J$  = 3.3 Hz), 116.4 (q,  $J$  = 270.7 Hz), 116.2 (s), 115.9 (s). IR (KBr):  $\nu$  2150, 2098, 1500, 1379, 1241, 1208, 1158, 1127, 1107, 904, 841, 614  $\text{cm}^{-1}$ . GC-MS  $m/z$  231 ( $\text{M}^+$ ). HRMS (EI)  $m/z$ : calcd. for  $\text{C}_{10}\text{H}_5\text{F}_4\text{NO}$ : 231.0307; found: 231.0305.

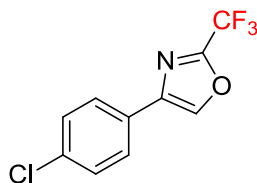

#### 4-(4-Chlorophenyl)-2-(trifluoromethyl)oxazole (3l)

Obtained as a white liquid in 63% yield (156 mg).  $R_f$  (*n*-pentane) = 0.72.  $^1\text{H}$  NMR (400 MHz,  $\text{CDCl}_3$ )  $\delta$  8.04 (s, 1H), 7.75 – 7.68 (m, 2H), 7.46 – 7.39 (m, 2H).  $^{19}\text{F}$  NMR (376 MHz,  $\text{CDCl}_3$ )  $\delta$  -65.9 (s, 3F).  $^{13}\text{C}$  NMR (101 MHz,  $\text{CDCl}_3$ )  $\delta$  151.1 (q,  $J = 44.2$  Hz), 141.1 (s), 135.5 (q,  $J = 1.2$  Hz), 134.9 (s), 129.2 (s), 127.7 (s), 127.1 (s), 116.4 (q,  $J = 270.8$  Hz). IR (KBr):  $\nu$  3180, 2795, 2048, 1613, 1597, 1485, 1377, 1242, 1155, 1091, 937, 834, 732, 548, 508  $\text{cm}^{-1}$ . GC-MS  $m/z$  247 ( $\text{M}^+$ ). HRMS (EI)  $m/z$ : calcd. for  $\text{C}_{10}\text{H}_5\text{ClF}_3\text{NO}$ : 247.0012; found: 247.0003.

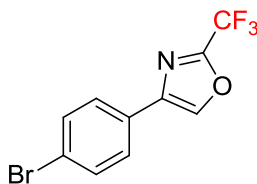

#### 4-(4-Bromophenyl)-2-(trifluoromethyl)oxazole (3m)

Obtained as a white solid in 61% yield (178 mg). M.p. 32–33 °C.  $R_f$  (*n*-pentane) = 0.73.  $^1\text{H}$  NMR (400 MHz,  $\text{CDCl}_3$ )  $\delta$  8.05 (s, 1H), 7.65 (d,  $J = 8.5$  Hz, 2H), 7.58 (d,  $J = 8.5$  Hz, 2H).  $^{19}\text{F}$  NMR (376 MHz,  $\text{CDCl}_3$ )  $\delta$  -65.9 (s, 3F).  $^{13}\text{C}$  NMR (101 MHz,  $\text{CDCl}_3$ )  $\delta$  151.1 (q,  $J = 44.2$  Hz), 141.2 (s), 135.6 (q,  $J = 1.2$  Hz), 132.2 (s), 128.2 (s), 127.3 (s), 123.2 (s), 116.4 (q,  $J = 270.8$  Hz). IR (KBr):  $\nu$  2244, 1596, 1481, 1376, 1243, 1207, 1159, 1126, 954, 938, 832, 549  $\text{cm}^{-1}$ . GC-MS  $m/z$  290 ( $\text{M}^+$ ). HRMS (EI)  $m/z$ : calcd. for  $\text{C}_{10}\text{H}_5\text{BrF}_3\text{NO}$ : 290.9507; found: 290.9503.

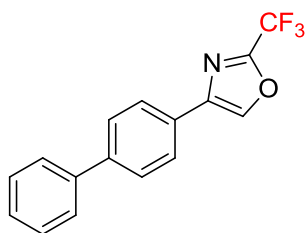

#### 4-([1,1'-Biphenyl]-4-yl)-2-(trifluoromethyl)oxazole (3n)

Obtained as a white solid in 97% yield (280 mg). M.p. 146–147 °C.  $R_f$  (*n*-pentane) = 0.45.  $^1\text{H}$  NMR (400 MHz,  $\text{CDCl}_3$ )  $\delta$  8.09 (s, 1H), 7.87 (d,  $J = 8.0$  Hz, 2H), 7.71 (d,  $J = 8.0$  Hz, 2H), 7.66 (d,  $J = 8.0$  Hz, 2H), 7.50 (t,  $J = 7.6$  Hz, 2H), 7.41 (t,  $J = 7.8$  Hz, 1H).  $^{19}\text{F}$  NMR (376 MHz,  $\text{CDCl}_3$ )  $\delta$  -65.8 (s, 3F).  $^{13}\text{C}$  NMR (101 MHz,  $\text{CDCl}_3$ )  $\delta$  151.0 (q,  $J = 44.2$  Hz), 141.9 (s), 141.8 (s), 140.3 (s), 135.4 (q,  $J = 1.2$  Hz), 128.9 (s), 128.2 (s), 127.7 (s), 127.6 (s), 127.1 (s), 126.3 (s), 116.5 (q,  $J = 270.6$  Hz). IR (KBr):  $\nu$  3036, 2209, 2013, 1581, 1483, 1385, 1245, 1202, 1130, 957, 841, 761, 551  $\text{cm}^{-1}$ . GC-MS  $m/z$  289 ( $\text{M}^+$ ). HRMS (EI)  $m/z$ : calcd. for  $\text{C}_{16}\text{H}_{10}\text{F}_3\text{NO}$ : 289.0714; found: 289.0711.

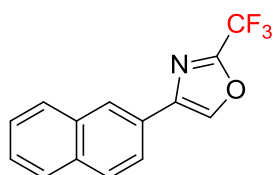

**4-(Naphthalen-2-yl)-2-(trifluoromethyl)oxazole (30)**

Obtained as a white solid in 64% yield (168 mg). M.p. 99–100 °C.  $R_f$  (*n*-pentane) = 0.42.  $^1\text{H}$  NMR (400 MHz,  $\text{CDCl}_3$ )  $\delta$  8.35 (s, 1H), 8.15 (s, 1H), 7.98 – 7.86 (m, 3H), 7.80 (d,  $J = 8.5$  Hz, 1H), 7.62 – 7.50 (m, 2H).  $^{19}\text{F}$  NMR (376 MHz,  $\text{CDCl}_3$ )  $\delta$  -65.8 (s, 3F).  $^{13}\text{C}$  NMR (101 MHz,  $\text{CDCl}_3$ )  $\delta$  151.1 (q,  $J = 44.2$  Hz), 142.2 (s), 135.7 (q,  $J = 1.2$  Hz), 133.5 (s), 133.4 (s), 128.8 (s), 128.4 (s), 127.8 (s), 126.8 (s), 126.7 (s), 126.5 (s), 125.2 (s), 123.2 (s), 116.5 (q,  $J = 270.7$  Hz). IR (KBr):  $\nu$  2251, 2155, 1381, 1247, 1209, 1163, 1124, 953, 902, 811, 476  $\text{cm}^{-1}$ . GC-MS  $m/z$  263 ( $\text{M}^+$ ). HRMS (EI)  $m/z$ : calcd. for  $\text{C}_{14}\text{H}_8\text{F}_3\text{NO}$ : 263.0558; found: 263.0564.

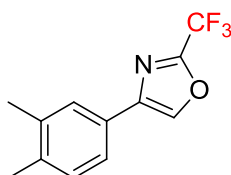

**4-(3,4-Dimethylphenyl)-2-(trifluoromethyl)oxazole (3p)**

Obtained as a white solid in 56% yield (136 mg). M.p. 28–29 °C.  $R_f$  (*n*-pentane) = 0.67.  $^1\text{H}$  NMR (400 MHz,  $\text{CDCl}_3$ )  $\delta$  8.00 (s, 1H), 7.58 (s, 1H), 7.50 (dd,  $J = 7.8, 1.6$

Hz, 1H), 7.22 (d,  $J = 7.8$  Hz, 1H), 2.34 (s, 3H), 2.33 (s, 3H).  $^{19}\text{F}$  NMR (376 MHz,  $\text{CDCl}_3$ )  $\delta$  -65.8 (s, 3F).  $^{13}\text{C}$  NMR (101 MHz,  $\text{CDCl}_3$ )  $\delta$  150.8 (q,  $J = 43.9$  Hz), 142.2 (s), 137.8 (s), 137.3 (s), 134.9 (q,  $J = 1.3$  Hz), 130.2 (s), 126.9 (s), 126.7 (s), 123.2 (s), 116.5 (q,  $J = 270.7$  Hz), 19.7 (s), 19.6 (s). IR (KBr):  $\nu$  2973, 2195, 1583, 1492, 1385, 1242, 1206, 1158, 1123, 952, 862, 820, 548  $\text{cm}^{-1}$ . GC-MS  $m/z$  241 ( $\text{M}^+$ ). HRMS (EI)  $m/z$ : calcd. for  $\text{C}_{12}\text{H}_{10}\text{F}_3\text{NO}$ : 241.0714; found: 241.0718.

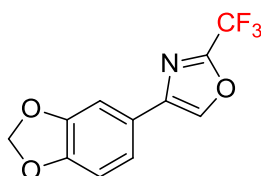

**4-(Benzo[*d*][1,3]dioxol-5-yl)-2-(trifluoromethyl)oxazole (3q)**

Obtained as a white solid in 89% yield (229 mg). M.p. 79–80 °C.  $R_f$  (*n*-pentane/ethyl acetate = 15:1) = 0.57.  $^1\text{H}$  NMR (400 MHz,  $\text{CDCl}_3$ )  $\delta$  7.94 (s, 1H), 7.32 – 7.27 (m, 1H), 7.23 (s, 1H), 6.89 (d,  $J = 8.1$  Hz, 1H), 6.04 (s, 2H).  $^{19}\text{F}$  NMR (376 MHz,  $\text{CDCl}_3$ )  $\delta$  -65.9 (s, 3F).  $^{13}\text{C}$  NMR (101 MHz,  $\text{CDCl}_3$ )  $\delta$  150.8 (q,  $J = 43.9$  Hz), 148.3 (s), 148.2 (s), 141.9 (s), 134.6 (q,  $J = 1.2$  Hz), 123.3 (s), 119.9 (s), 116.4 (q,  $J = 270.7$  Hz), 108.8 (s), 106.3 (s), 101.4 (s). IR (KBr):  $\nu$  2853, 1586, 1505, 1483, 1448, 1383, 1287, 1235, 1198, 1124, 951, 873, 767, 682  $\text{cm}^{-1}$ . GC-MS  $m/z$  257 ( $\text{M}^+$ ). HRMS (EI)  $m/z$ : calcd. for  $\text{C}_{11}\text{H}_6\text{F}_3\text{NO}_3$ : 257.0300; found: 257.0304.

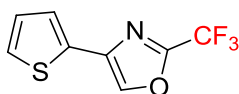

**4-(Thiophen-2-yl)-2-(trifluoromethyl)oxazole (3r)**

Obtained as a white solid in 72% yield (158 mg). M.p. 45–46 °C.  $R_f$  (*n*-pentane) = 0.52.  $^1\text{H}$  NMR (400 MHz,  $\text{CDCl}_3$ )  $\delta$  7.96 (s, 1H), 7.50 – 7.43 (m, 1H), 7.39 (d,  $J = 5.0$  Hz, 1H), 7.12 (dd,  $J = 4.7, 3.9$  Hz, 1H).  $^{19}\text{F}$  NMR (376 MHz,  $\text{CDCl}_3$ )  $\delta$  -65.8 (s, 3F).  $^{13}\text{C}$  NMR (101 MHz,  $\text{CDCl}_3$ )  $\delta$  150.9 (q,  $J = 44.3$  Hz), 137.2 (s), 134.5 (q,  $J = 1.2$  Hz), 131.4 (s), 127.9 (s), 126.3 (s), 125.6 (s), 116.3 (q,  $J = 271.0$  Hz). IR (KBr):  $\nu$  3160,

2926, 2189, 1381, 1251, 1206, 1160, 1100, 952, 849, 701, 489  $\text{cm}^{-1}$ . GC-MS  $m/z$  218 ( $\text{M}^+$ ). HRMS (EI)  $m/z$ : calcd. for  $\text{C}_8\text{H}_4\text{F}_3\text{NOS}$ : 218.9966; found: 218.9962.

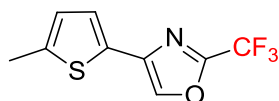

**4-(5-Methylthiophen-2-yl)-2-(trifluoromethyl)oxazole (3s)**

Obtained as a white solid in 66% yield (154 mg). M.p. 46–47 °C.  $R_f$  (*n*-pentane) = 0.42.  $^1\text{H}$  NMR (400 MHz,  $\text{CDCl}_3$ )  $\delta$  7.87 (s, 1H), 7.25 (d,  $J = 3.5$  Hz, 1H), 6.76 (d,  $J = 3.5$  Hz, 1H), 2.54 (s, 3H).  $^{19}\text{F}$  NMR (376 MHz,  $\text{CDCl}_3$ )  $\delta$  -65.8 (s, 3F).  $^{13}\text{C}$  NMR (101 MHz,  $\text{CDCl}_3$ )  $\delta$  150.7 (q,  $J = 44.2$  Hz), 141.1 (s), 137.4 (s), 133.9 (q,  $J = 1.3$  Hz), 128.9 (s), 126.0 (s), 125.7 (s), 116.4 (q,  $J = 270.9$  Hz), 15.3 (s). IR (KBr):  $\nu$  3139, 2926, 2050, 1979, 1585, 1467, 1394, 1254, 1140, 1096, 955, 811, 786, 512  $\text{cm}^{-1}$ . GC-MS  $m/z$  233 ( $\text{M}^+$ ). HRMS (EI)  $m/z$ : calcd. for  $\text{C}_9\text{H}_6\text{F}_3\text{NOS}$ : 233.0122; found: 233.0124.

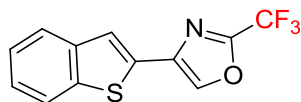

**4-(Benzo[*b*]thiophen-2-yl)-2-(trifluoromethyl)oxazole (3t)**

Obtained as a white solid in 62% yield (167 mg). M. p. 118–119 °C.  $R_f$  (*n*-pentane) = 0.35.  $^1\text{H}$  NMR (400 MHz, acetone- $d_6$ )  $\delta$  8.79 (s, 1H), 8.00 – 7.95 (m, 1H), 7.92 – 7.88 (m, 1H), 7.87 (s, 1H), 7.55 – 7.36 (m, 2H).  $^{19}\text{F}$  NMR (376 MHz, acetone- $d_6$ )  $\delta$  -66.7 (s, 3F).  $^{13}\text{C}$  NMR (101 MHz, acetone- $d_6$ )  $\delta$  150.3 (q,  $J = 44.0$  Hz), 139.9 (s), 139.5 (s), 137.8 (q,  $J = 1.0$  Hz), 137.0 (s), 131.6 (s), 125.3 (s), 124.9 (s), 124.1 (s), 122.4 (s), 122.3 (s), 116.6 (q,  $J = 269.9$  Hz). IR (KBr):  $\nu$  2253, 1637, 1517, 1380, 1208, 1126, 1100, 953, 867, 525, 478  $\text{cm}^{-1}$ . GC-MS  $m/z$  269 ( $\text{M}^+$ ). HRMS (EI)  $m/z$ : calcd. for  $\text{C}_{12}\text{H}_6\text{F}_3\text{NOS}$ : 269.0122; found: 269.0123.

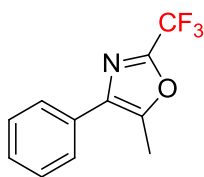

**5-Methyl-4-phenyl-2-(trifluoromethyl)oxazole (3u)**

Obtained as a white liquid in 76% yield (173 mg).  $R_f$  (*n*-pentane) = 0.65.  $^1\text{H}$  NMR (400 MHz,  $\text{CDCl}_3$ )  $\delta$  7.71 (d,  $J = 7.4$  Hz, 2H), 7.49 (t,  $J = 7.4$  Hz, 2H), 7.40 (t,  $J = 7.4$  Hz, 1H), 2.63 (s, 3H).  $^{19}\text{F}$  NMR (376 MHz,  $\text{CDCl}_3$ )  $\delta$  -65.8 (s, 3F).  $^{13}\text{C}$  NMR (101 MHz,  $\text{CDCl}_3$ )  $\delta$  148.5 (q,  $J = 43.8$  Hz), 146.7 (q,  $J = 0.9$  Hz), 136.0 (s), 130.6 (s), 128.8 (s), 128.2 (s), 126.9 (s), 116.7 (q,  $J = 270.3$  Hz), 11.8 (s). IR (KBr):  $\nu$  2927, 1587, 1495, 1446, 1397, 1371, 1349, 1198, 1144, 1118, 972, 771, 734, 662  $\text{cm}^{-1}$ . GC-MS  $m/z$  227 ( $\text{M}^+$ ). HRMS (EI)  $m/z$ : calcd. for  $\text{C}_{11}\text{H}_8\text{F}_3\text{NO}$ : 227.0558; found: 227.0553.

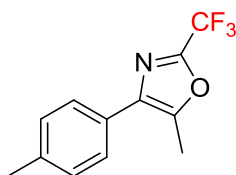

**5-Methyl-4-(*p*-tolyl)-2-(trifluoromethyl)oxazole (3v)**

Obtained as a white liquid in 82% yield (198 mg).  $R_f$  (*n*-pentane) = 0.72.  $^1\text{H}$  NMR (400 MHz,  $\text{CDCl}_3$ )  $\delta$  7.59 (d,  $J = 8.1$  Hz, 2H), 7.29 (d,  $J = 8.1$  Hz, 2H), 2.62 (s, 3H), 2.43 (s, 3H).  $^{19}\text{F}$  NMR (376 MHz,  $\text{CDCl}_3$ )  $\delta$  -65.8 (s, 3F).  $^{13}\text{C}$  NMR (101 MHz,  $\text{CDCl}_3$ )  $\delta$  148.4 (q,  $J = 43.7$  Hz), 146.3 (q,  $J = 1.2$  Hz), 138.1 (s), 136.1 (s), 129.5 (s), 127.7 (s), 126.8 (s), 116.7 (q,  $J = 270.3$  Hz), 21.2 (s), 11.8 (s). IR (KBr):  $\nu$  2926, 1589, 1513, 1399, 1371, 1346, 1199, 1149, 1121, 1031, 972, 759, 733, 692  $\text{cm}^{-1}$ . GC-MS  $m/z$  241 ( $\text{M}^+$ ). HRMS (EI)  $m/z$ : calcd. for  $\text{C}_{12}\text{H}_{10}\text{F}_3\text{NO}$ : 241.0714; found: 241.0710.

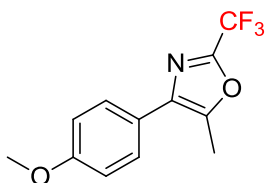

#### 4-(4-Methoxyphenyl)-5-methyl-2-(trifluoromethyl)oxazole (3w)

Obtained as a white solid in 82% yield (212mg). M.p. 62–63 °C.  $R_f$  (n-pentane) = 0.60.  $^1\text{H}$  NMR (400 MHz,  $\text{CDCl}_3$ )  $\delta$  7.61 (d,  $J = 8.6$  Hz, 2H), 6.99 (d,  $J = 8.6$  Hz, 2H), 3.86 (s, 3H), 2.59 (s, 3H).  $^{19}\text{F}$  NMR (376 MHz,  $\text{CDCl}_3$ )  $\delta$  -65.9 (s, 3F).  $^{13}\text{C}$  NMR (101 MHz,  $\text{CDCl}_3$ )  $\delta$  159.6 (s), 148.3 (q,  $J = 43.6$  Hz), 145.7 (q,  $J = 1.0$  Hz), 135.8 (s), 128.2 (s), 123.1 (s), 116.7 (q,  $J = 270.2$  Hz), 114.2 (s), 55.2 (s), 11.7 (s). IR (KBr):  $\nu$  2749, 2243, 1607, 1590, 1511, 1464, 1309, 1295, 1175, 1106, 956, 834, 786, 534  $\text{cm}^{-1}$ . GC-MS  $m/z$  257 ( $\text{M}^+$ ). HRMS (EI)  $m/z$ : calcd. for  $\text{C}_{12}\text{H}_{10}\text{F}_3\text{NO}_2$ : 257.0664; found: 257.0662.

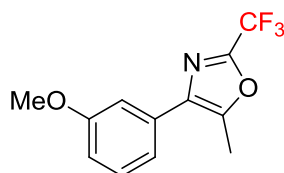

#### 4-(3-Methoxyphenyl)-5-methyl-2-(trifluoromethyl)oxazole (3x)

Obtained as a white liquid in 68% yield (175 mg).  $R_f$  (n-pentane) = 0.45.  $^1\text{H}$  NMR (400 MHz,  $\text{CDCl}_3$ )  $\delta$  7.39 (t,  $J = 7.9$  Hz, 1H), 7.26 (s, 1H), 7.25 (d,  $J = 7.3$  Hz, 1H), 7.00 – 6.89 (m, 1H), 3.89 (s, 3H), 2.64 (s, 3H).  $^{19}\text{F}$  NMR (376 MHz,  $\text{CDCl}_3$ )  $\delta$  -65.8 (s, 3F).  $^{13}\text{C}$  NMR (101 MHz,  $\text{CDCl}_3$ )  $\delta$  159.9 (s), 148.4 (q,  $J = 43.8$  Hz), 146.9 (q,  $J = 1.2$  Hz), 135.9 (s), 131.9 (s), 129.8 (s), 119.2 (s), 116.6 (q,  $J = 270.4$  Hz), 113.9 (s), 112.4 (s), 55.4 (s), 12.2 (s). IR (KBr):  $\nu$  2926, 2623, 1579, 1492, 1465, 1447, 1396, 1370, 1287, 1144, 1028, 972, 849, 738, 553  $\text{cm}^{-1}$ . GC-MS  $m/z$  257 ( $\text{M}^+$ ). HRMS (EI)  $m/z$ : calcd. for  $\text{C}_{12}\text{H}_{10}\text{F}_3\text{NO}_2$ : 257.0664; found: 257.0671.

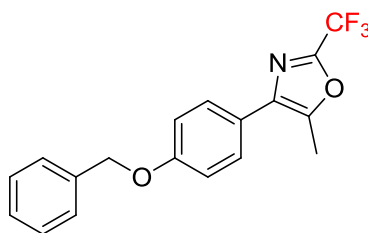

#### 4-(4-(Benzyloxy)phenyl)-5-methyl-2-(trifluoromethyl)oxazole (3y)



Obtained as a white solid in 74% yield (229 mg). M.p. 87–88 °C.  $R_f$  (*n*-pentane/ethyl acetate = 15:1) = 0.65.  $^1\text{H}$  NMR (400 MHz,  $\text{CDCl}_3$ )  $\delta$  7.63 (d,  $J$  = 8.5 Hz, 2H), 7.53 – 7.34 (m, 5H), 7.09 (d,  $J$  = 8.5 Hz, 2H), 5.14 (s, 2H), 2.61 (s, 3H).  $^{19}\text{F}$  NMR (376 MHz,  $\text{CDCl}_3$ )  $\delta$  -65.8 (s, 3F).  $^{13}\text{C}$  NMR (101 MHz,  $\text{CDCl}_3$ )  $\delta$  158.8 (s), 148.4 (q,  $J$  = 43.7 Hz), 145.7 (q,  $J$  = 1.1 Hz), 136.8 (s), 135.8 (s), 128.7 (s), 128.2 (s), 128.1 (s), 127.5 (s), 123.4 (s), 116.7 (q,  $J$  = 270.2 Hz), 115.2 (s), 70.1 (s), 11.8 (s). IR (KBr):  $\nu$  2978, 2235, 1606, 1590, 1509, 1454, 1371, 1349, 1291, 1123, 957, 833, 761, 534  $\text{cm}^{-1}$ . GC-MS  $m/z$  333 ( $\text{M}^+$ ). HRMS (EI)  $m/z$ : calcd. for  $\text{C}_{18}\text{H}_{14}\text{F}_3\text{NO}_2$ : 333.0977; found: 333.0969.

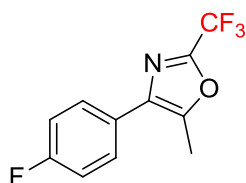

**4-(4-Fluorophenyl)-5-methyl-2-(trifluoromethyl)oxazole (3z)**

Obtained as a white solid in 47% yield (116 mg). M.p. 29–30 °C.  $R_f$  (*n*-pentane) = 0.75.  $^1\text{H}$  NMR (400 MHz,  $\text{CDCl}_3$ )  $\delta$  7.71 – 7.58 (m, 2H), 7.24 – 7.08 (m, 2H), 2.60 (s, 3H).  $^{19}\text{F}$  NMR (376 MHz,  $\text{CDCl}_3$ )  $\delta$  -65.9 (s, 3F), -113.2 – -113.3 (m, 1F).  $^{13}\text{C}$  NMR (101 MHz,  $\text{CDCl}_3$ )  $\delta$  163.8 (s), 161.3 (s), 148.5 (q,  $J$  = 43.9 Hz), 146.5 (q,  $J$  = 1.2 Hz), 135.2 (s), 128.6 (d,  $J$  = 8.3 Hz), 126.7 (d,  $J$  = 3.3 Hz), 116.6 (q,  $J$  = 270.3 Hz), 115.9 (s), 115.7 (s), 11.7 (s). IR (KBr):  $\nu$  2183, 2050, 1607, 1592, 1399, 1371, 1346, 1204, 1152, 1120, 1025, 973, 840, 760, 528  $\text{cm}^{-1}$ . GC-MS  $m/z$  245 ( $\text{M}^+$ ). HRMS (EI)  $m/z$ : calcd. for  $\text{C}_{11}\text{H}_7\text{F}_4\text{NO}$ : 245.0464; found: 245.0458.

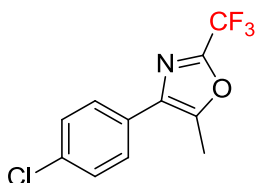

**4-(4-Chlorophenyl)-5-methyl-2-(trifluoromethyl)oxazole (3aa)**

Obtained as a white solid in 74% yield (194 mg). M.p. 42–43 °C.  $R_f$  (*n*-pentane) = 0.68.  $^1\text{H}$  NMR (400 MHz,  $\text{CDCl}_3$ )  $\delta$  7.61 (d,  $J$  = 8.5 Hz, 2H), 7.42 (d,  $J$  = 8.5 Hz, 2H),

2.61 (s, 3H).  $^{19}\text{F}$  NMR (376 MHz,  $\text{CDCl}_3$ )  $\delta$  -65.9 (s, 3F).  $^{13}\text{C}$  NMR (101 MHz,  $\text{CDCl}_3$ )  $\delta$  148.6 (q,  $J = 43.9$  Hz), 146.9 (q,  $J = 1.2$  Hz), 135.1 (s), 134.1 (s), 129.1 (s), 128.9 (s), 128.0 (s), 116.6 (q,  $J = 270.4$  Hz), 11.8 (s). IR (KBr):  $\nu$  2250, 1604, 1588, 1584, 1492, 1379, 1371, 1345, 1200, 1150, 1120, 972, 833, 762, 554  $\text{cm}^{-1}$ . GC-MS  $m/z$  261 ( $\text{M}^+$ ). HRMS (EI)  $m/z$ : calcd. for  $\text{C}_{11}\text{H}_7\text{ClF}_3\text{NO}$ : 261.0168; found: 261.0164.

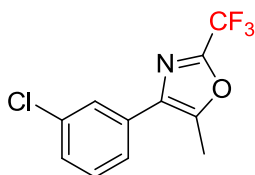

#### 4-(3-Chlorophenyl)-5-methyl-2-(trifluoromethyl)oxazole (**3ab**)

Obtained as a white liquid in 35% yield (92 mg).  $R_f$  ( $n$ -pentane) = 0.70.  $^1\text{H}$  NMR (400 MHz,  $\text{CDCl}_3$ )  $\delta$  7.69 (s, 1H), 7.55 (d,  $J = 7.5$  Hz, 1H), 7.44 – 7.31 (m, 2H), 2.63 (s, 3H).  $^{19}\text{F}$  NMR (376 MHz,  $\text{CDCl}_3$ )  $\delta$  -65.9 (s, 3F).  $^{13}\text{C}$  NMR (101 MHz,  $\text{CDCl}_3$ )  $\delta$  148.6 (q,  $J = 44.0$  Hz), 147.3 (q,  $J = 0.9$  Hz), 134.8 (s), 132.3 (s), 130.0 (s), 128.2 (s), 126.8 (s), 124.8 (s), 116.5 (q,  $J = 270.4$  Hz), 11.9 (s). IR (KBr):  $\nu$  2250, 1608, 1598, 1580, 1472, 1369, 1348, 1205, 1145, 952, 853, 755, 558  $\text{cm}^{-1}$ . GC-MS  $m/z$  261 ( $\text{M}^+$ ) HRMS (ESI)  $m/z$ : calcd. for  $\text{C}_{11}\text{H}_7\text{ClF}_3\text{NO}$ : 261.0168; found: 261.0164.

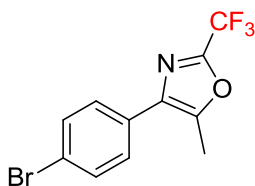

#### 4-(4-Bromophenyl)-5-methyl-2-(trifluoromethyl)oxazole (**3ac**)

Obtained as a white solid in 66% yield (210 mg). M.p. 53–54 °C.  $R_f$  ( $n$ -pentane) = 0.72.  $^1\text{H}$  NMR (400 MHz,  $\text{CDCl}_3$ )  $\delta$  7.63 – 7.48 (m, 4H), 2.61 (s, 3H).  $^{19}\text{F}$  NMR (376 MHz,  $\text{CDCl}_3$ )  $\delta$  -65.9 (s, 3F).  $^{13}\text{C}$  NMR (101 MHz,  $\text{CDCl}_3$ )  $\delta$  148.6 (q,  $J = 44.0$  Hz), 146.9 (q,  $J = 1.1$  Hz), 135.1 (s), 131.9 (s), 129.5 (s), 128.3 (s), 122.3 (s), 116.5 (q,  $J = 270.4$  Hz), 11.9 (s). IR (KBr):  $\nu$  2842, 2236, 1819, 1602, 1582, 1487, 1394, 1346, 1202, 1007, 957, 831, 765, 521  $\text{cm}^{-1}$ . GC-MS  $m/z$  304 ( $\text{M}^+$ ). HRMS (EI)  $m/z$ : calcd. for  $\text{C}_{11}\text{H}_7\text{BrF}_3\text{NO}$ : 304.9663; found: 304.9668.

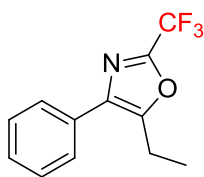

#### 5-Ethyl-4-phenyl-2-(trifluoromethyl)oxazole (3ad)

Obtained as a white liquid in 56% yield (135 mg).  $R_f$  (*n*-pentane) = 0.52.  $^1\text{H}$  NMR (400 MHz,  $\text{CDCl}_3$ )  $\delta$  7.72 – 7.66 (m, 2H), 7.50 (t,  $J$  = 7.6 Hz, 2H), 7.40 (t,  $J$  = 7.6 Hz, 1H), 3.01 (q,  $J$  = 7.5 Hz, 2H), 1.40 (t,  $J$  = 7.5 Hz, 2H).  $^{19}\text{F}$  NMR (376 MHz,  $\text{CDCl}_3$ )  $\delta$  -65.8 (s, 3F).  $^{13}\text{C}$  NMR (101 MHz,  $\text{CDCl}_3$ )  $\delta$  151.7 (q,  $J$  = 1.2 Hz), 148.6 (q,  $J$  = 43.7 Hz), 135.4 (s), 130.7 (s), 128.8 (s), 128.3 (s), 127.1 (s), 116.7 (q,  $J$  = 270.3 Hz), 19.5 (s), 12.1 (s). IR (KBr):  $\nu$  2981, 2875, 2164, 1584, 1495, 1447, 1391, 1377, 1271, 1148, 1072, 989, 969, 772, 562  $\text{cm}^{-1}$ . GC-MS  $m/z$  241 ( $\text{M}^+$ ). HRMS (EI)  $m/z$ : calcd. for  $\text{C}_{12}\text{H}_{10}\text{F}_3\text{NO}$ : 241.0714; found: 241.0717.

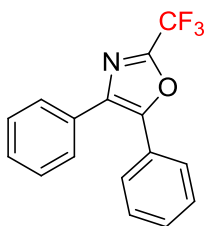

#### 4-(4-Methoxyphenyl)-5-phenyl-2-(trifluoromethyl)oxazole (3ae)

Obtained as a colorless oil in 48% yield (138 mg). M.p. 73–74 °C.  $R_f$  (*n*-pentane/ethyl acetate = 15:1) = 0.50.  $^1\text{H}$  NMR (400 MHz,  $\text{CDCl}_3$ )  $\delta$  7.76 – 7.64 (m, 4H), 7.50 – 7.41 (m, 6H).  $^{19}\text{F}$  NMR (376 MHz,  $\text{CDCl}_3$ )  $\delta$  -65.7 (s, 3F).  $^{13}\text{C}$  NMR (101 MHz,  $\text{CDCl}_3$ )  $\delta$  149.2 (q,  $J$  = 43.9 Hz), 148.0 (q,  $J$  = 1.2 Hz), 136.0 (s), 130.8 (s), 129.9 (s), 129.0 (s), 128.9 (s), 128.8 (s), 128.0 (s), 127.3 (s), 127.1 (s), 116.7 (q,  $J$  = 270.7 Hz). IR (KBr):  $\nu$  3062, 1580, 1504, 1482, 1445, 1383, 1354, 1206, 1145, 1120, 1073, 970, 763, 734, 690, 565  $\text{cm}^{-1}$ . GC-MS  $m/z$  288 ( $\text{M}^+$ ). HRMS (EI)  $m/z$ : calcd. for  $\text{C}_{16}\text{H}_{10}\text{F}_3\text{NO}$ : 289.0714; found: 289.0711.

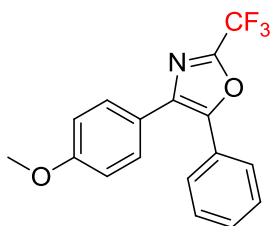

#### 4-(4-Methoxyphenyl)-5-phenyl-2-(trifluoromethyl)oxazole (3af)

Obtained as a white solid in 52% yield (166 mg). M.p. 113–114 °C.  $R_f$  (*n*-pentane/ethyl acetate = 15:1) = 0.63.  $^1\text{H}$  NMR (400 MHz,  $\text{CDCl}_3$ )  $\delta$  7.76 – 7.55 (m, 4H), 7.51 – 7.37 (m, 3H), 6.96 (d,  $J$  = 8.6 Hz, 2H), 3.88 (s, 3H).  $^{19}\text{F}$  NMR (376 MHz,  $\text{CDCl}_3$ )  $\delta$  -65.7 (s, 3F).  $^{13}\text{C}$  NMR (101 MHz,  $\text{CDCl}_3$ )  $\delta$  160.1 (s), 149.0 (q,  $J$  = 44.0 Hz), 147.2 (q,  $J$  = 1.0 Hz), 135.7 (s), 129.7 (s), 129.4 (s), 128.9 (s), 127.5 (s), 126.9 (s), 123.1 (s), 116.7 (q,  $J$  = 270.6 Hz), 114.2 (s), 55.3 (s). IR (KBr):  $\nu$  2839, 2182, 2025, 1616, 1515, 1447, 1355, 1251, 1209, 972, 836, 718, 565  $\text{cm}^{-1}$ . GC-MS  $m/z$  319 ( $\text{M}^+$ ). HRMS (EI)  $m/z$ : calcd. for  $\text{C}_{17}\text{H}_{12}\text{F}_3\text{NO}_2$ : 319.0820; found: 319.0824.

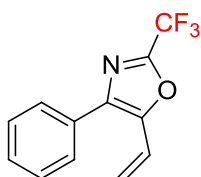

#### 4-Phenyl-2-(trifluoromethyl)-5-vinyloxazole (3ag)

Obtained as a colorless oil in 38% yield (90 mg).  $R_f$  (*n*-pentane) = 0.55.  $^1\text{H}$  NMR (400 MHz,  $\text{CDCl}_3$ )  $\delta$  7.44 – 7.34 (m, 5H), 7.31 (s, 1H), 6.44 (d,  $J$  = 21.7 Hz, 2H).  $^{19}\text{F}$  NMR (376 MHz,  $\text{CDCl}_3$ )  $\delta$  -68.9 (s, 3F).  $^{13}\text{C}$  NMR (101 MHz,  $\text{CDCl}_3$ )  $\delta$  137.2 (s), 132.3 (s), 128.9 (s), 128.1 (s), 127.9 (s), 121.4 (q,  $J$  = 4.7 Hz), 117.3 (s), 115.5 (q,  $J$  = 288.0 Hz), 114.6 (s). IR (KBr):  $\nu$  2925, 1752, 1602, 1511, 1477, 1404, 1363, 1293, 1217, 1153, 1110, 892, 865, 824, 757, 694, 675, 586  $\text{cm}^{-1}$ . GC-MS  $m/z$  239 ( $\text{M}^+$ ). HRMS (EI)  $m/z$ : calcd. for  $\text{C}_{12}\text{H}_8\text{F}_3\text{NO}$ : 239.0558; found: 239.0553.

## Crystal structure analyses

The suitable crystals of **3j** (CCDC 1835965) were mounted on quartz fibers and X-ray data collected on a Bruker AXS APEX diffractometer, equipped with a CCD detector at -50 °C, using MoK $\alpha$  radiation ( $\lambda$  0.71073 Å). The data was corrected for Lorentz and polarisation effect with the **SMART** suite of programs and for absorption effects with SADABS.<sup>7</sup> Structure solution and refinement were carried out with the SHELXTL suite of programs.<sup>7</sup> The structure was solved by direct methods to locate the heavy atoms, followed by difference maps for the light non-hydrogen atoms.

## ORTEP diagrams

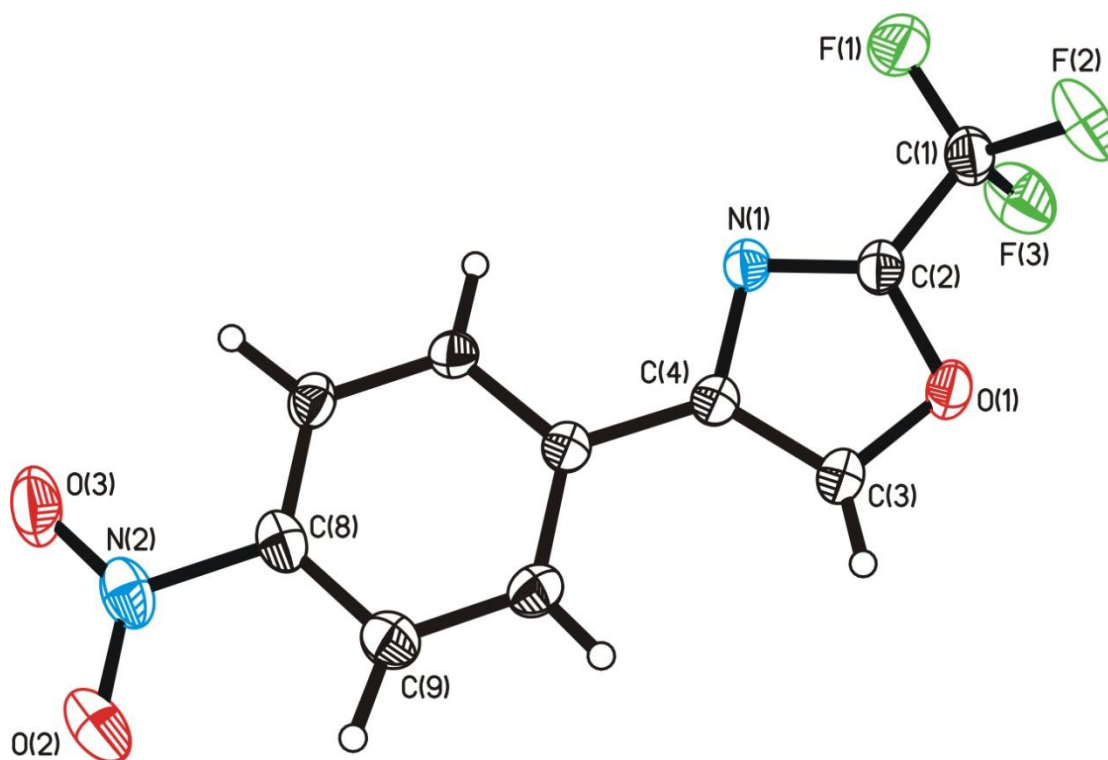

ORTEP diagram of compound 3j. Thermal ellipsoids are drawn at 40% probability

## References:

1. P. C. Too, Y.-F. Wang and S. Chiba, *Org. Lett.*, 2010, **12**, 5688-5691.
2. J. Ke, Y. Tang, H. Yi, Y. Li, Y. Cheng, C. Liu and A. Lei, *Angew. Chem. Int. Ed.*, 2015, **54**, 6604-6607.
3. H. Huang, J. Cai, X. Ji, F. Xiao, Y. Chen and G.-J. Deng, *Angew. Chem. Int. Ed.*, 2016, **55**, 307-311.
4. X. Tang, J. Yang, Z. Zhu, M. Zheng, W. Wu and H. Jiang, *J. Org. Chem.*, 2016, **81**, 11461-11466.
5. C. Zhu, R. Zhu, H. Zeng, F. Chen, C. Liu, W. Wu and H. Jiang, *Angew. Chem. Int. Ed.*, 2017, **56**, 13324-13328.
6. H. Huang, J. Cai, H. Xie, J. Tan, F. Li and G.-J. Deng, *Org. Lett.*, 2017, **19**, 3743-3746.
7. SHELXTL version 5.03; Bruker Analytical X-ray Systems, Madison, WI, 1997.

# Copies of $^1\text{H}$ NMR, $^{13}\text{C}$ NMR and $^{19}\text{F}$ NMR spectra

$^{19}\text{F}$  NMR spectrum of **3a** in  $\text{CDCl}_3$

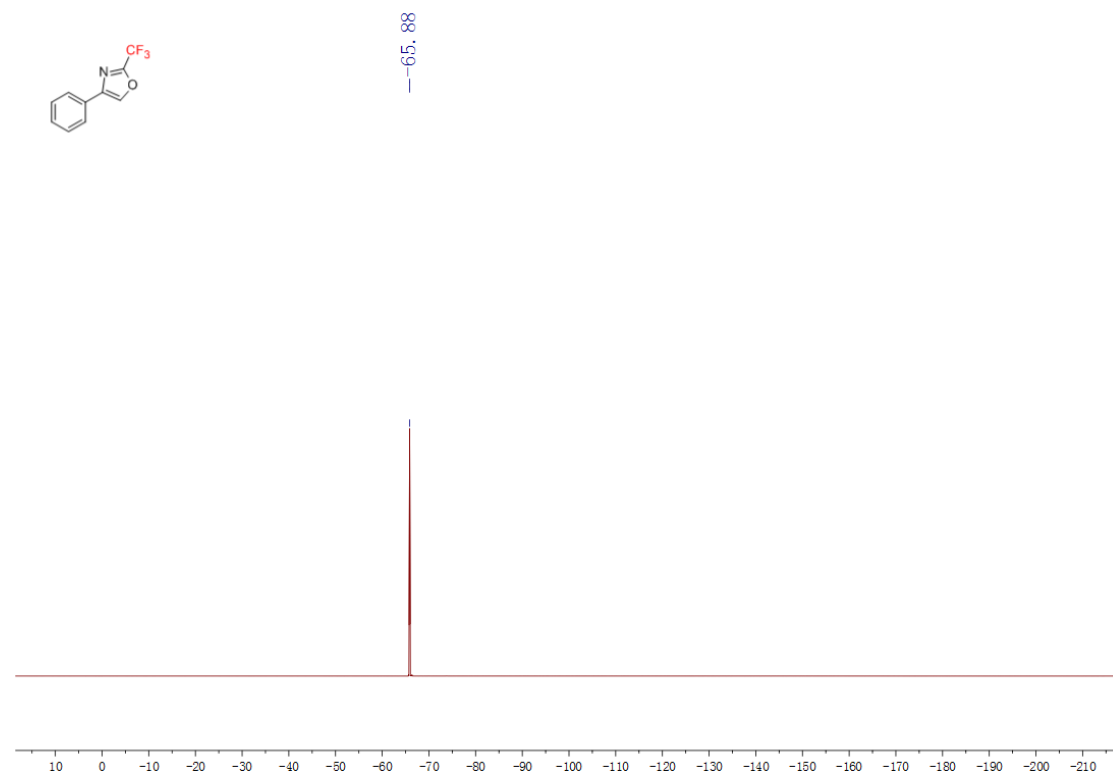

$^1\text{H}$  NMR spectrum of **3a** in  $\text{CDCl}_3$

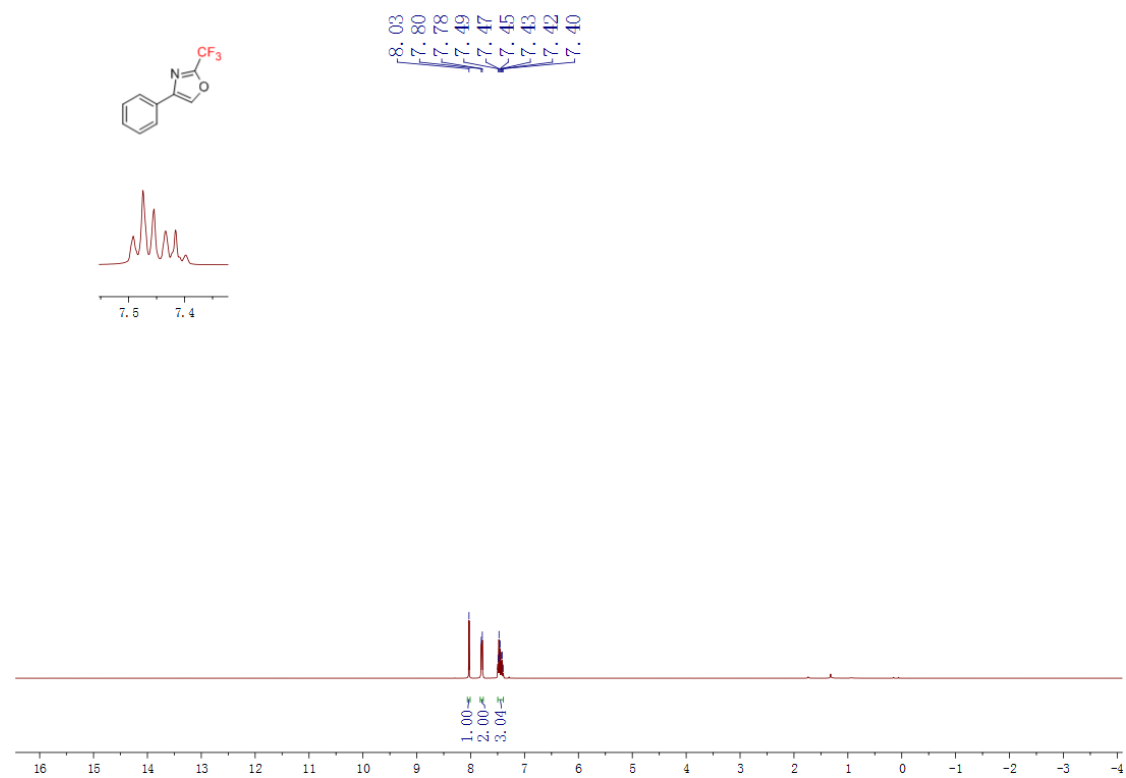



**<sup>13</sup>C NMR spectrum of 3a in CDCl<sub>3</sub>**

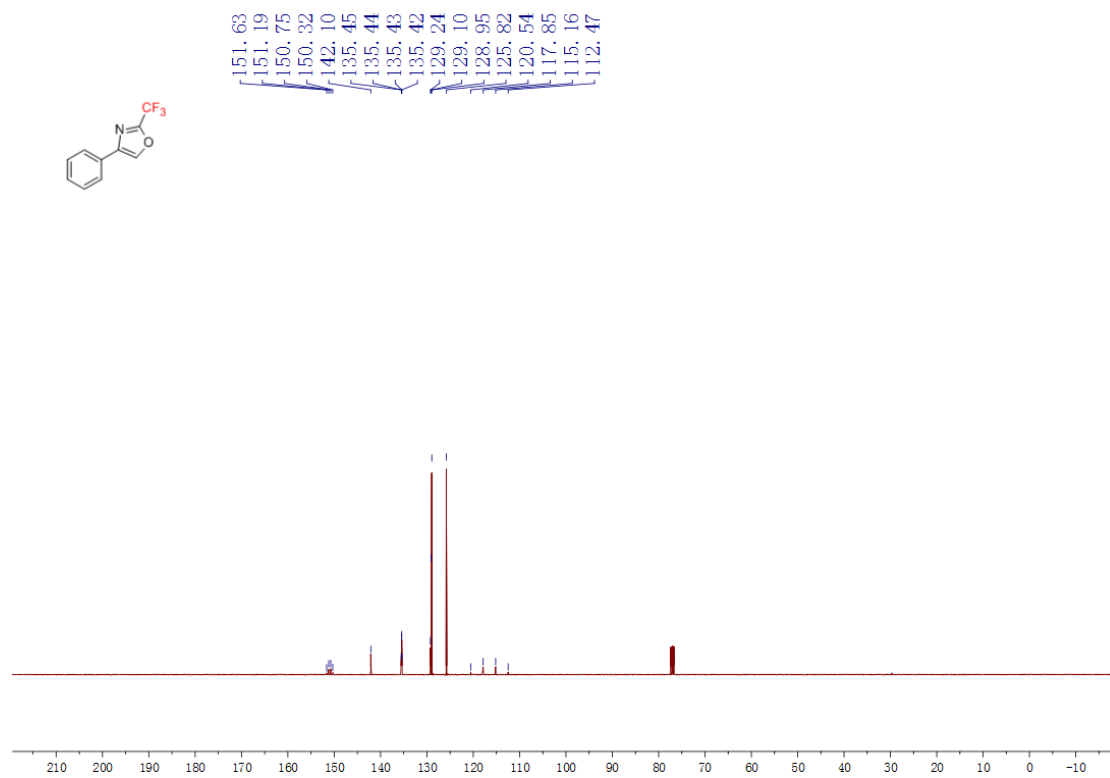

**<sup>19</sup>F NMR spectrum of 3b in CDCl<sub>3</sub>**

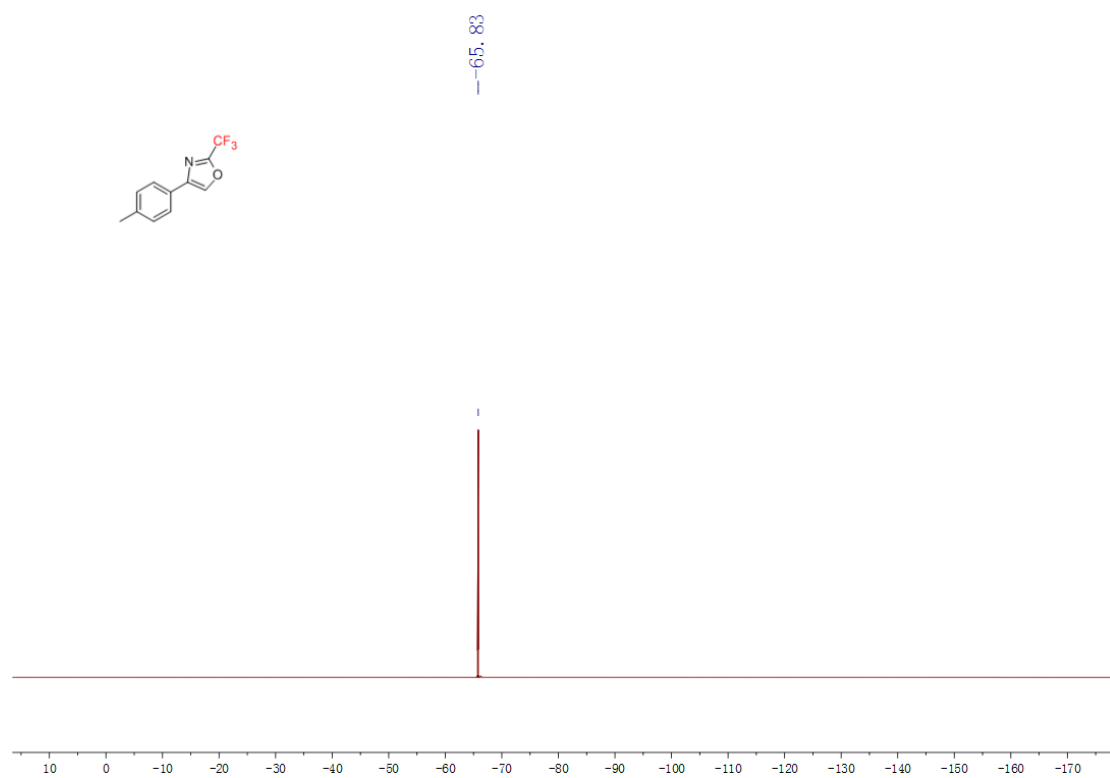

**<sup>1</sup>H NMR spectrum of 3b in CDCl<sub>3</sub>**

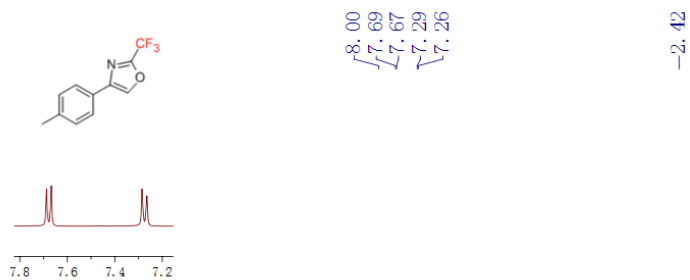

**<sup>13</sup>C NMR spectrum of 3b in CDCl<sub>3</sub>**

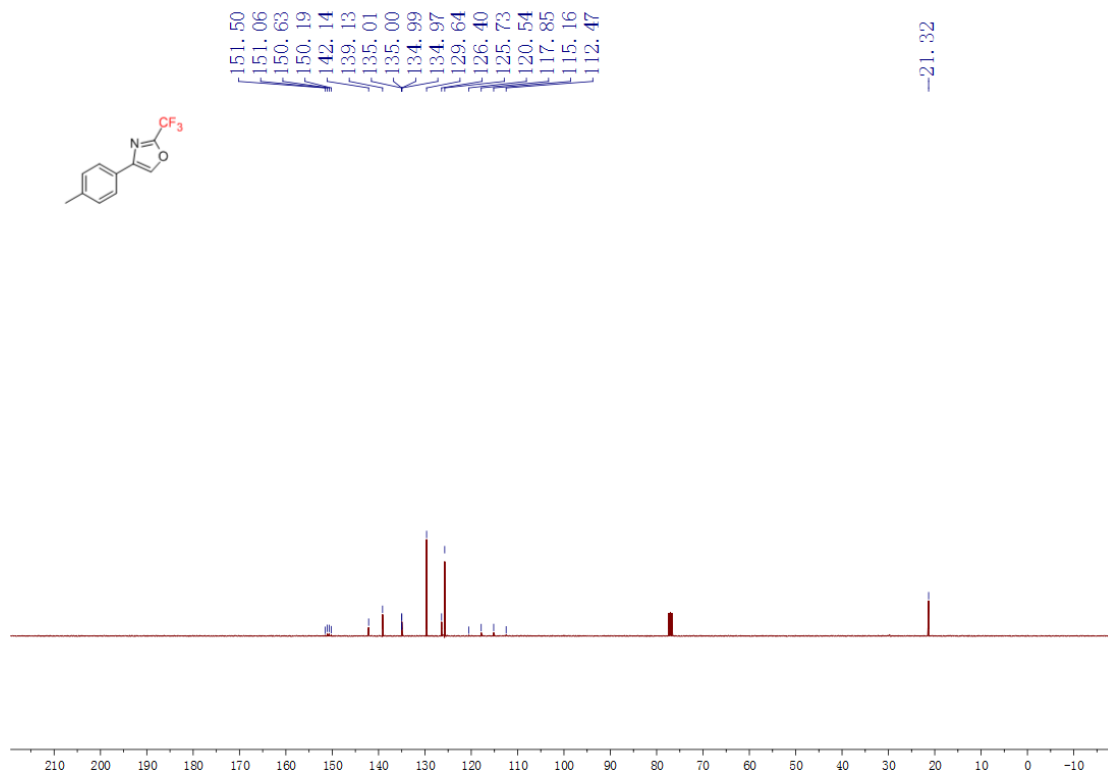

**<sup>19</sup>F NMR spectrum of 3c in CDCl<sub>3</sub>**

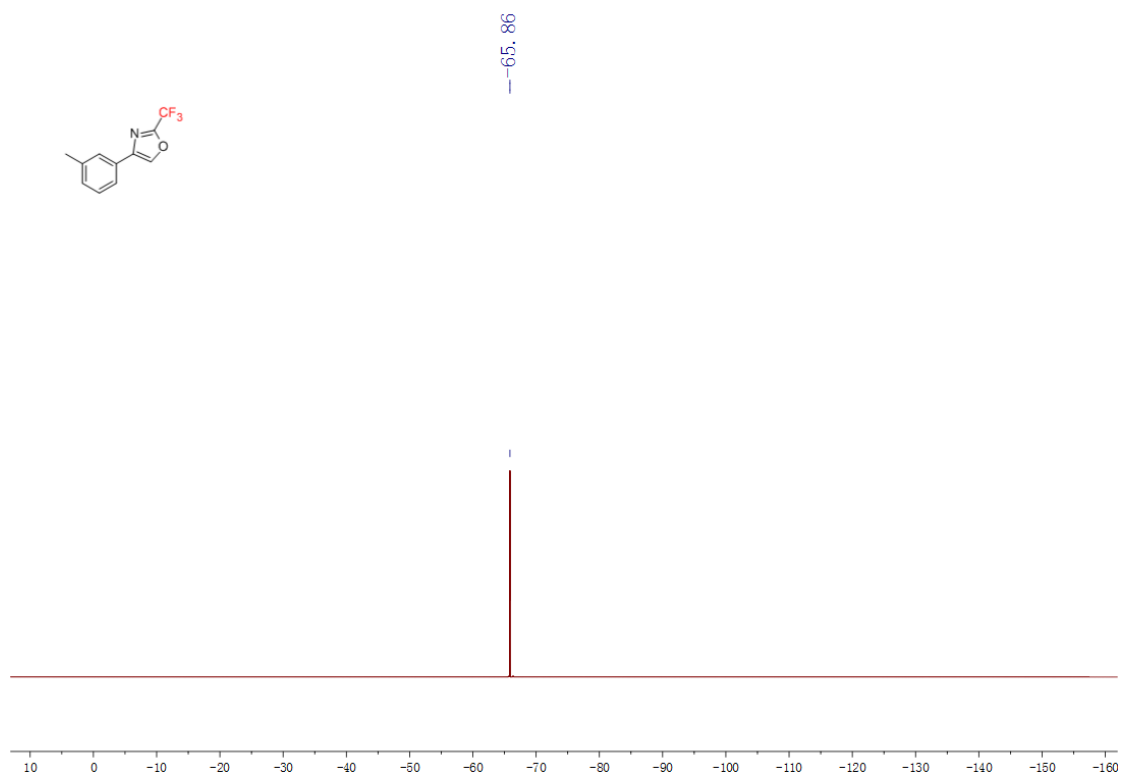

**<sup>1</sup>H NMR spectrum of 3c in CDCl<sub>3</sub>**

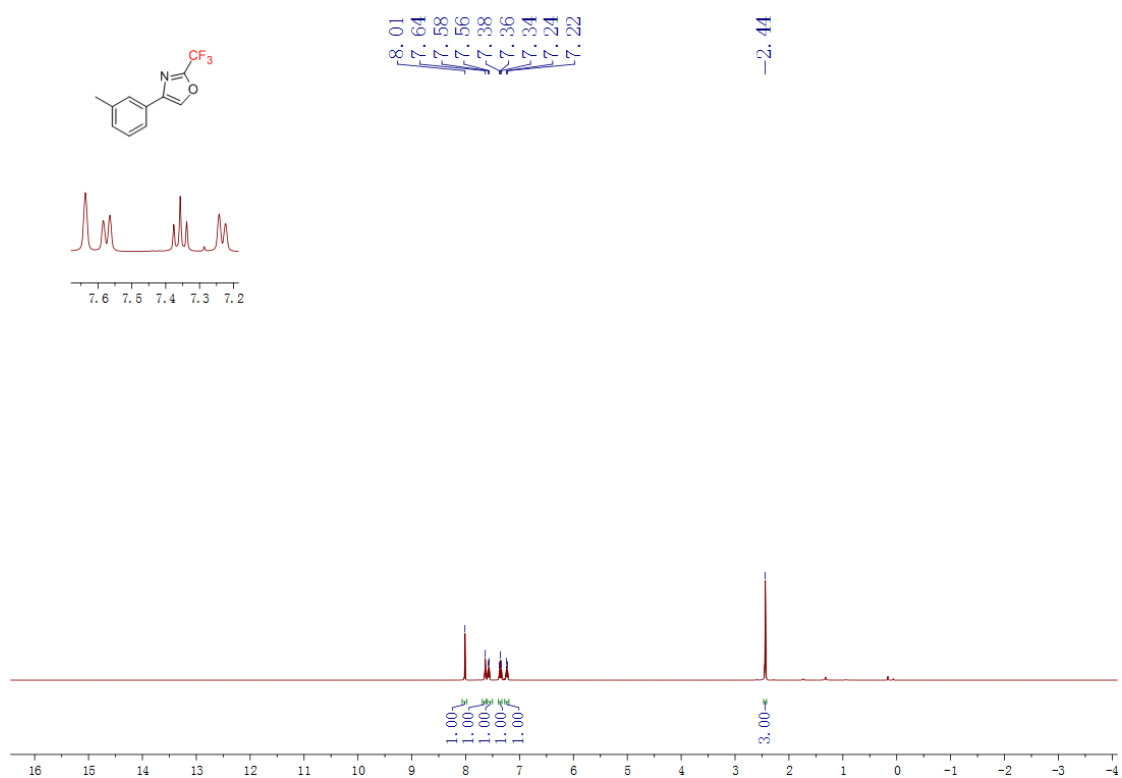

**<sup>13</sup>C NMR spectrum of 3c in CDCl<sub>3</sub>**

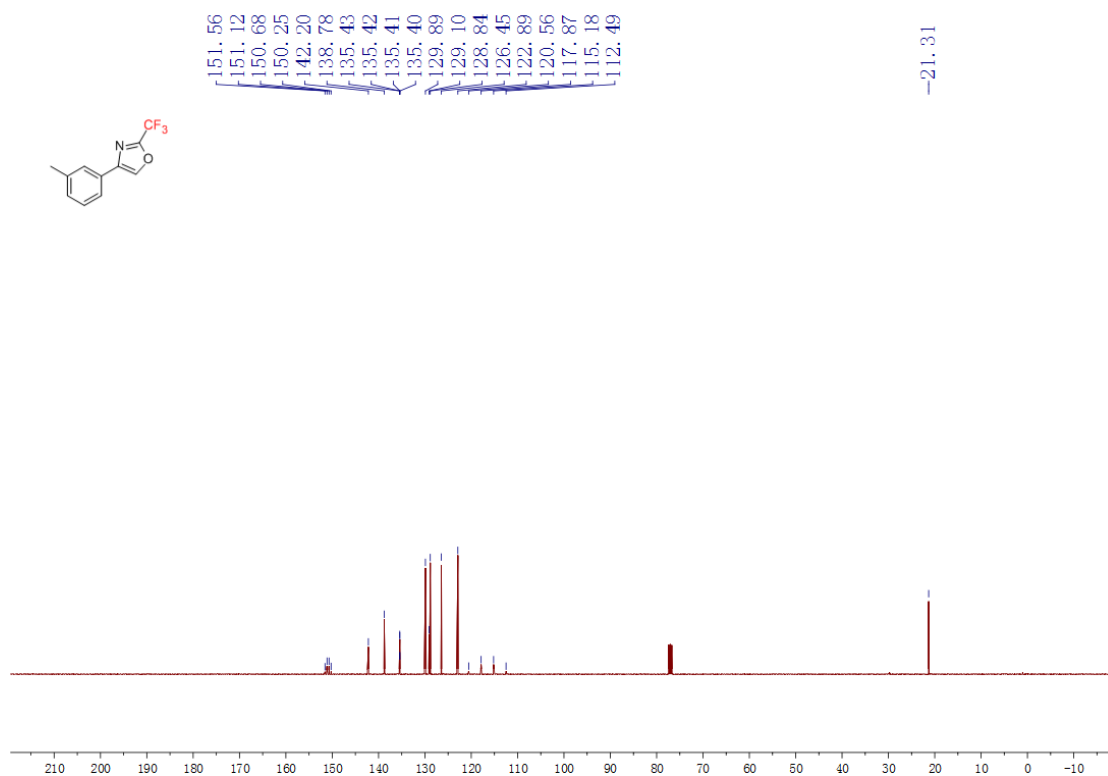

**<sup>19</sup>F NMR spectrum of 3d in CDCl<sub>3</sub>**

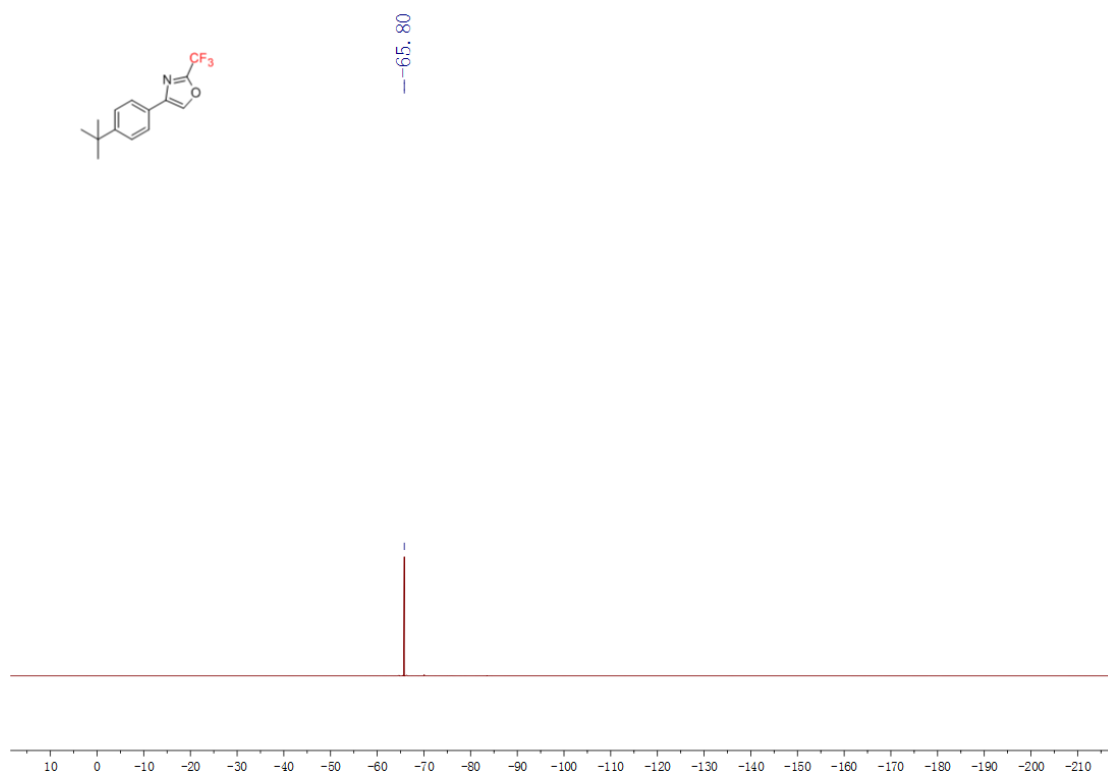

$^1\text{H}$  NMR spectrum of **3d** in  $\text{CDCl}_3$

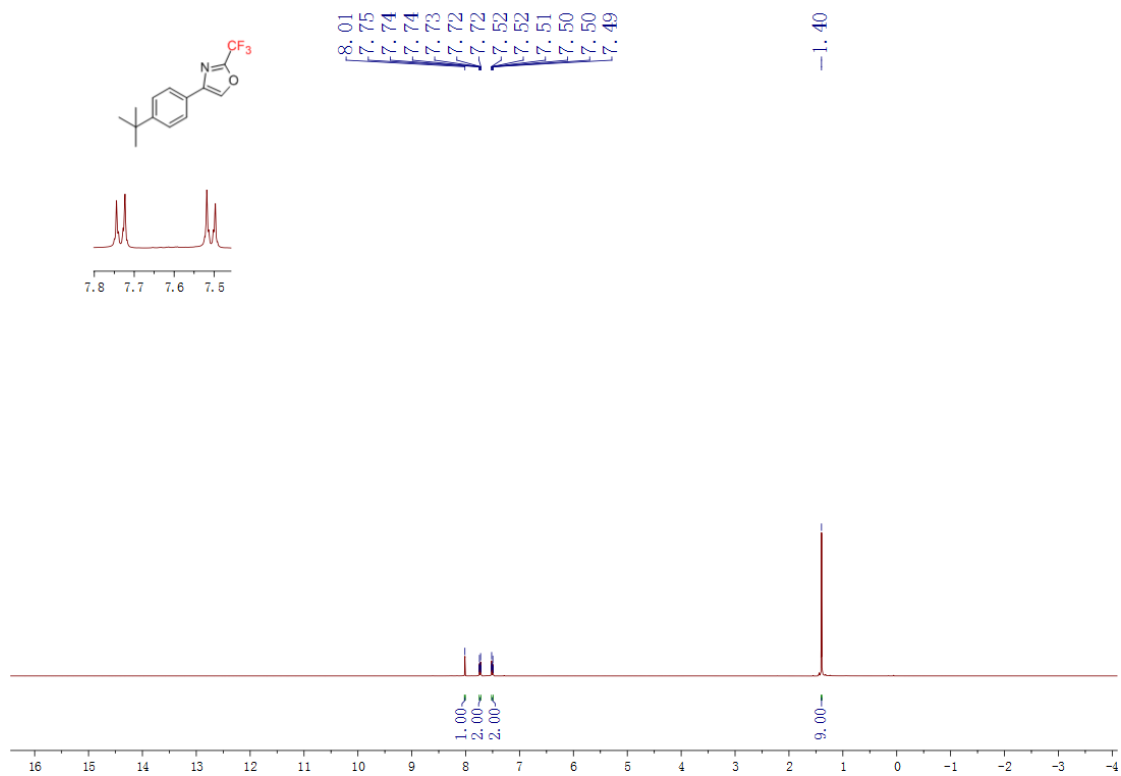

$^{13}\text{C}$  NMR spectrum of **3d** in  $\text{CDCl}_3$

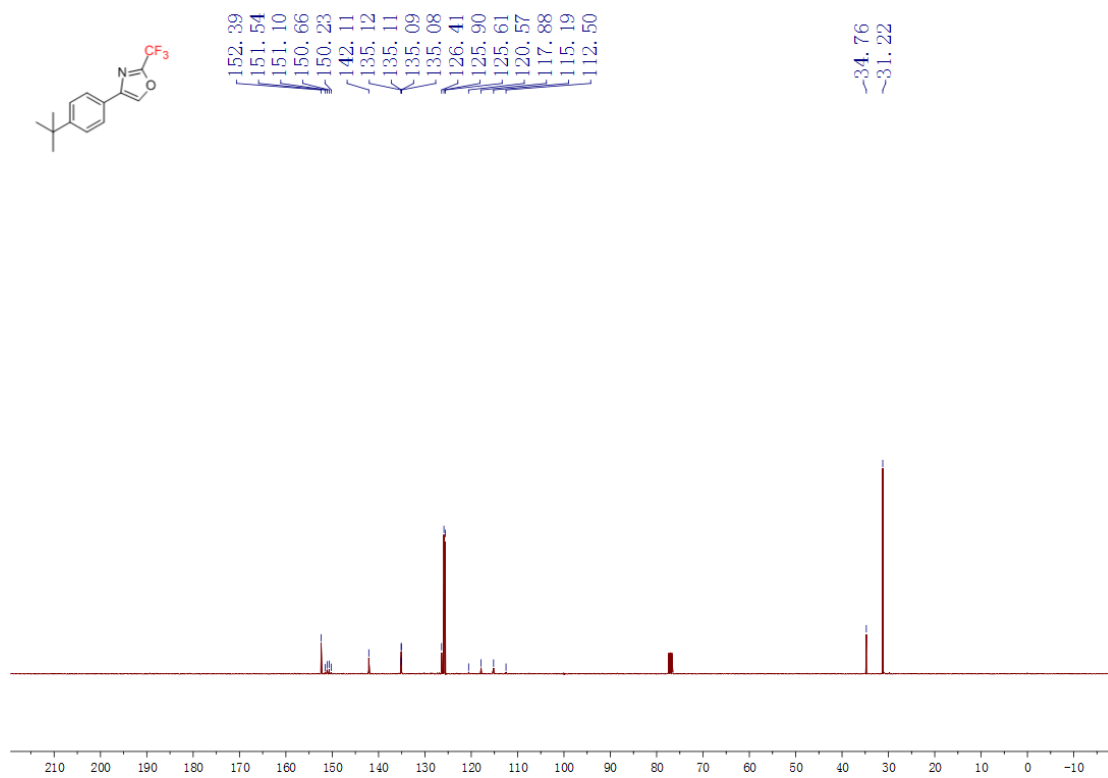

**<sup>19</sup>F NMR spectrum of 3e in CDCl<sub>3</sub>**

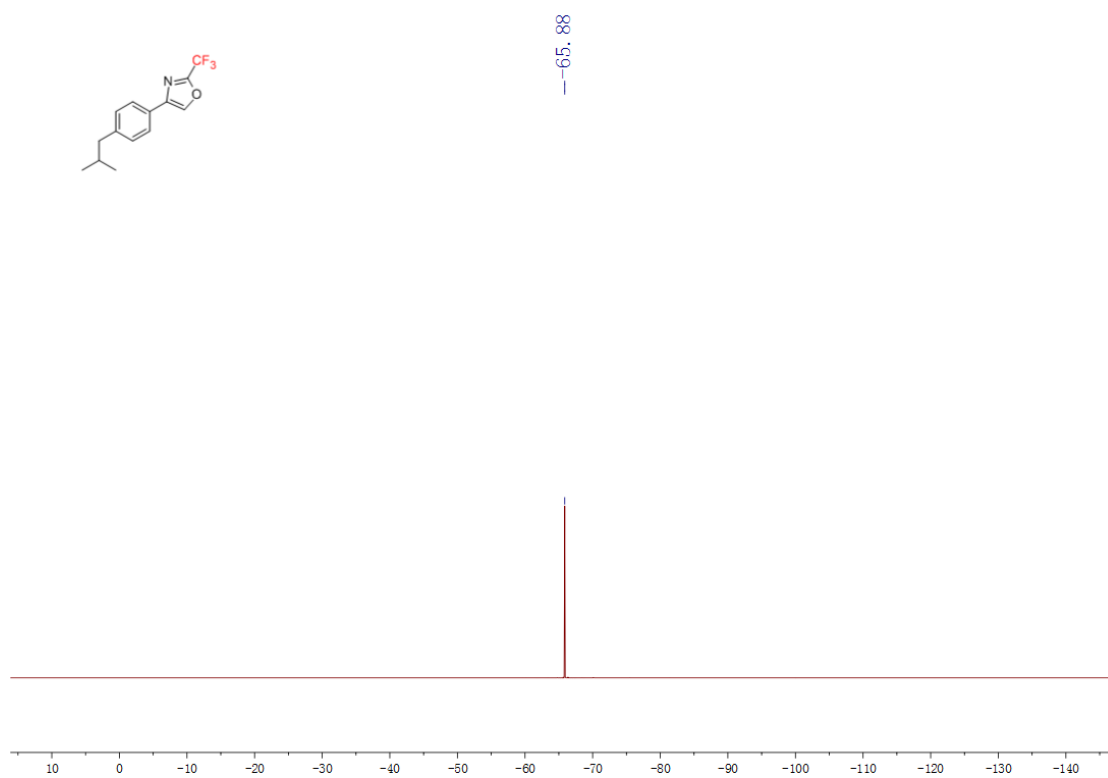

**<sup>1</sup>H NMR spectrum of 3e in CDCl<sub>3</sub>**

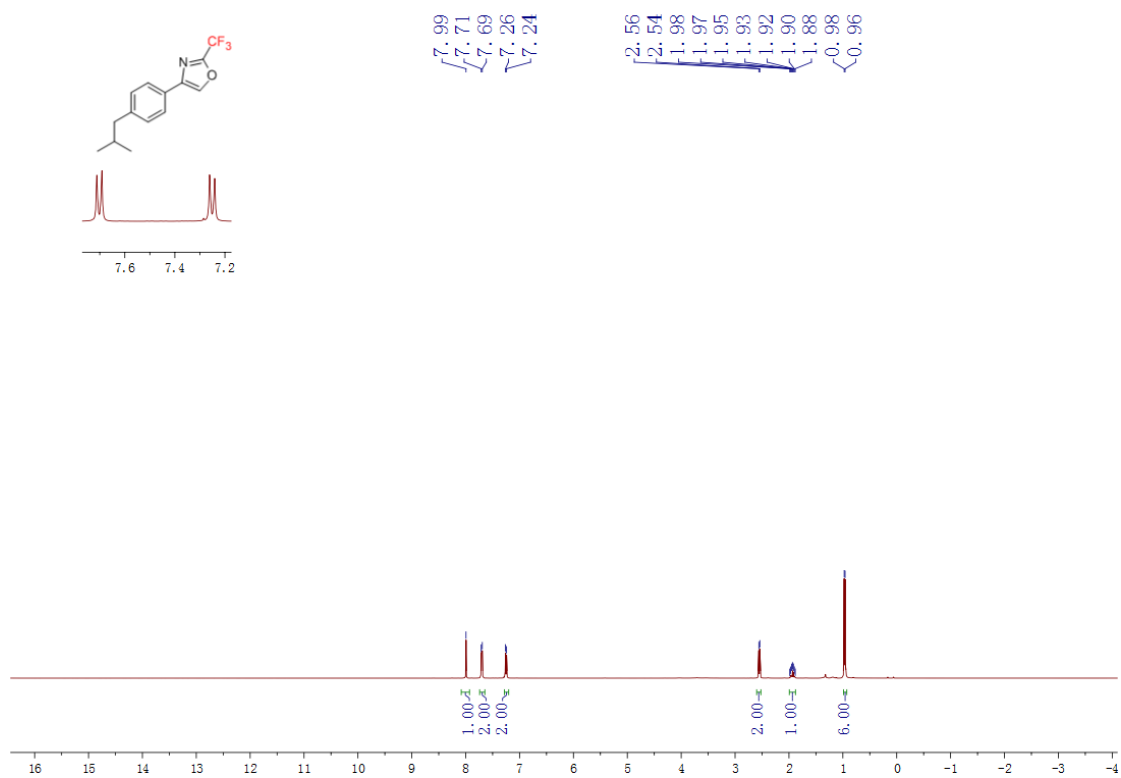

**<sup>13</sup>C NMR spectrum of 3e in CDCl<sub>3</sub>**

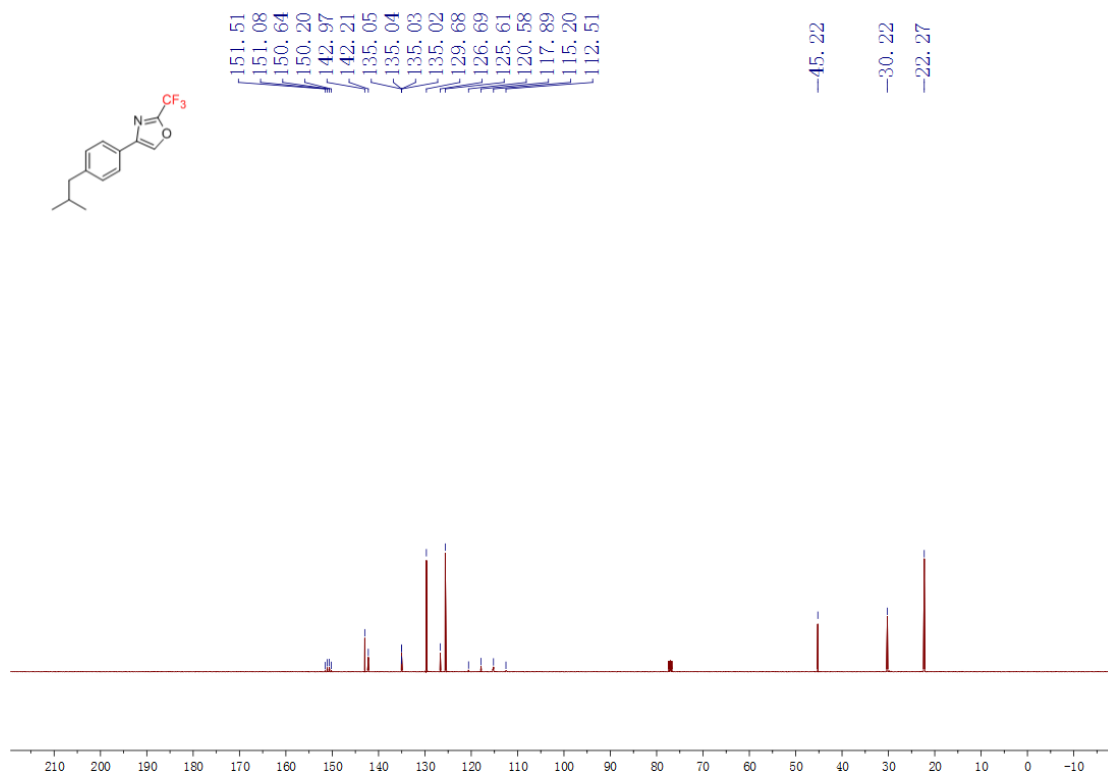

**<sup>19</sup>F NMR spectrum of 3f in CDCl<sub>3</sub>**

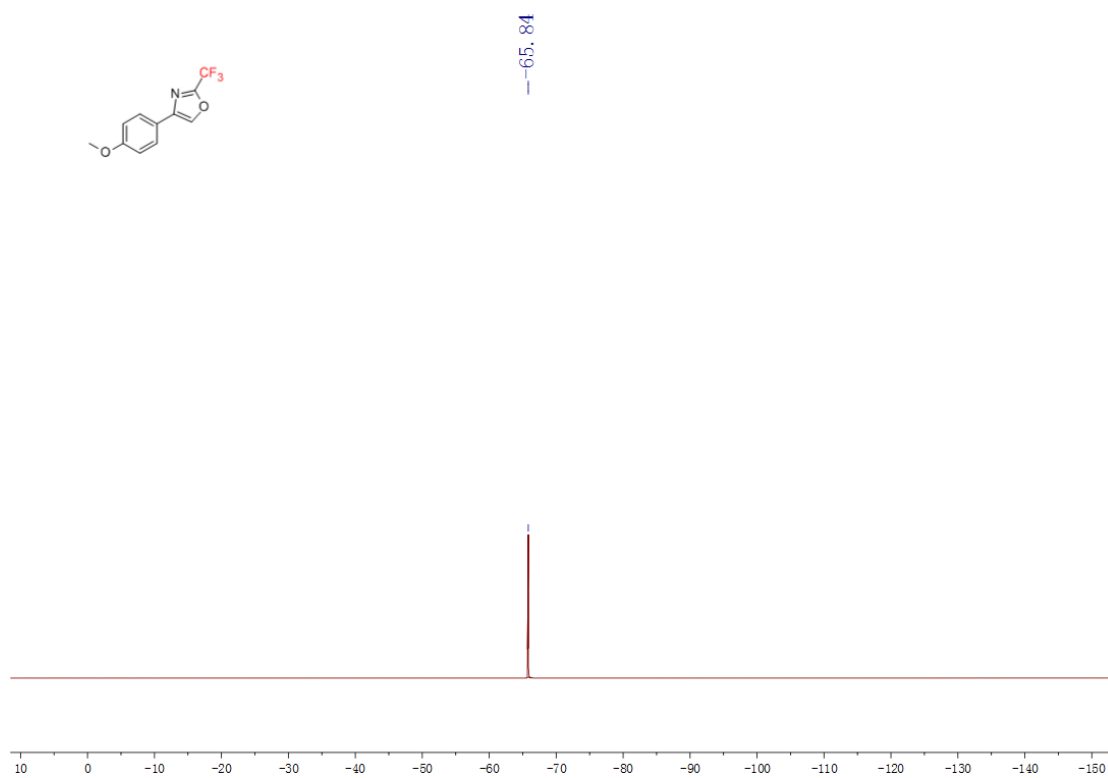

<sup>1</sup>H NMR spectrum of **3f** in CDCl<sub>3</sub>

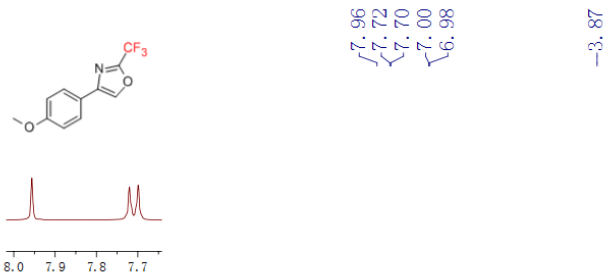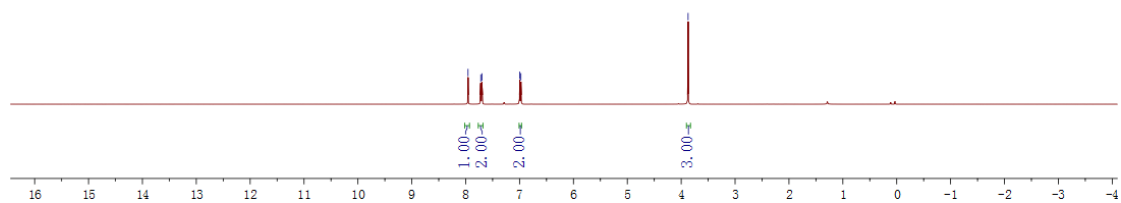

<sup>13</sup>C NMR spectrum of **3f** in CDCl<sub>3</sub>

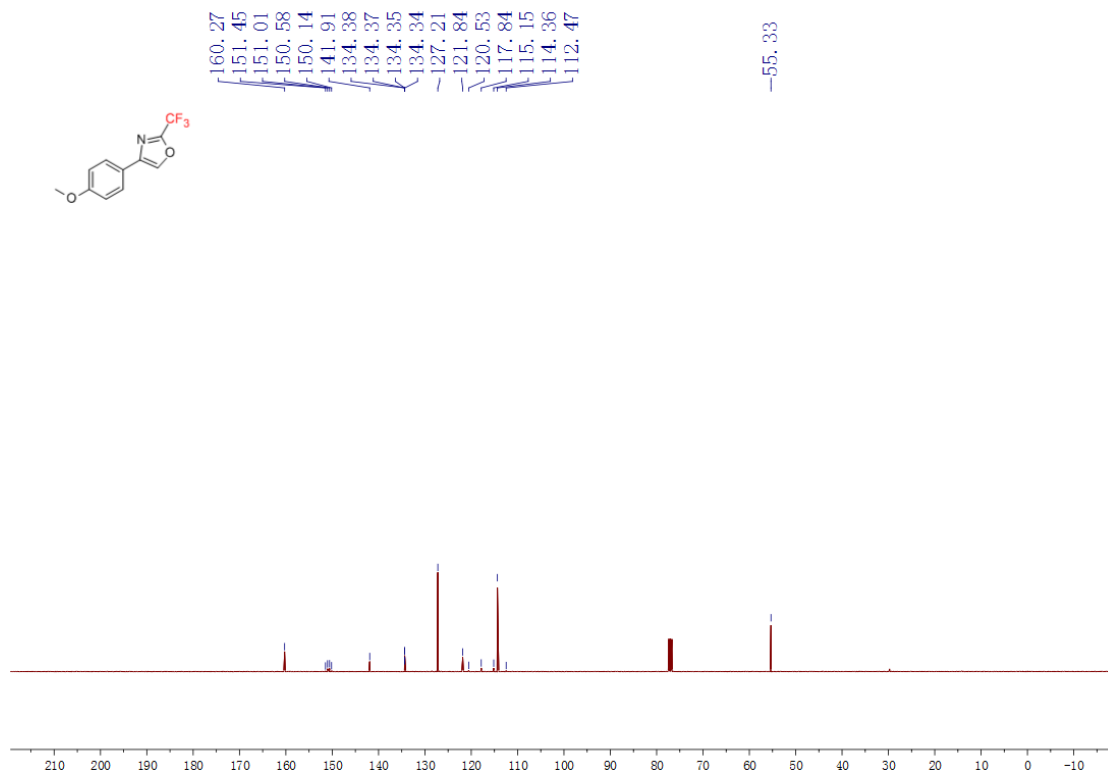



**<sup>19</sup>F NMR spectrum of 3g in CDCl<sub>3</sub>**

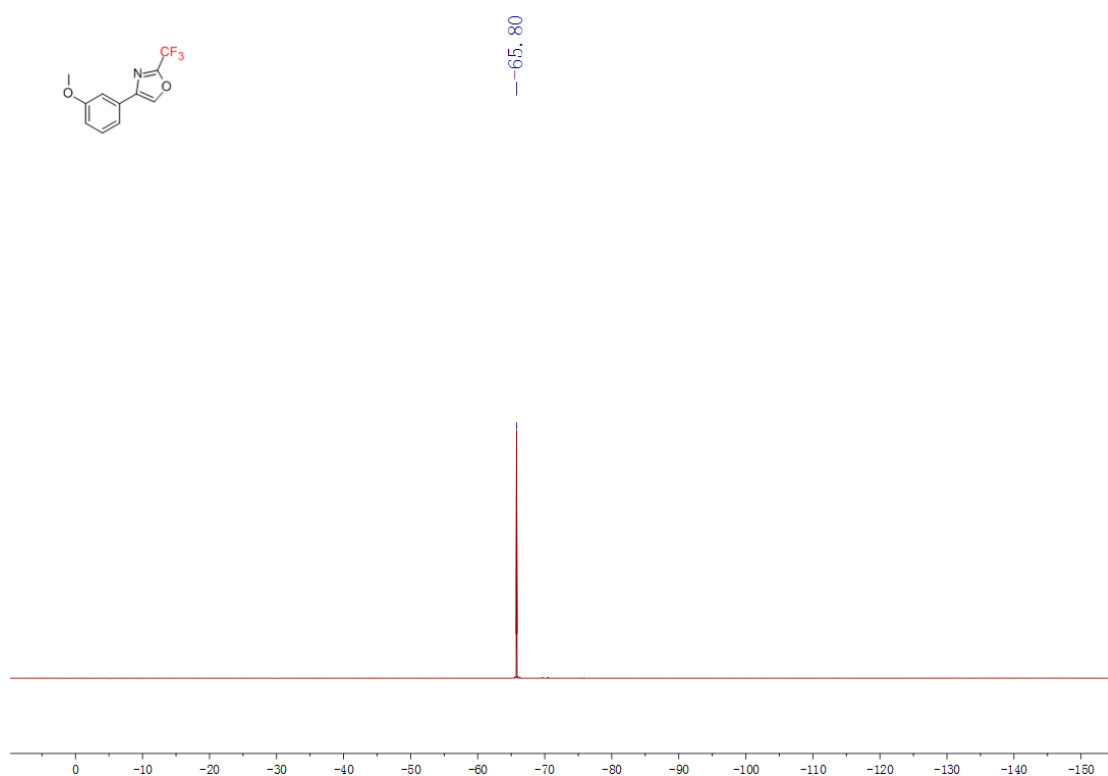

**<sup>1</sup>H NMR spectrum of 3g in CDCl<sub>3</sub>**

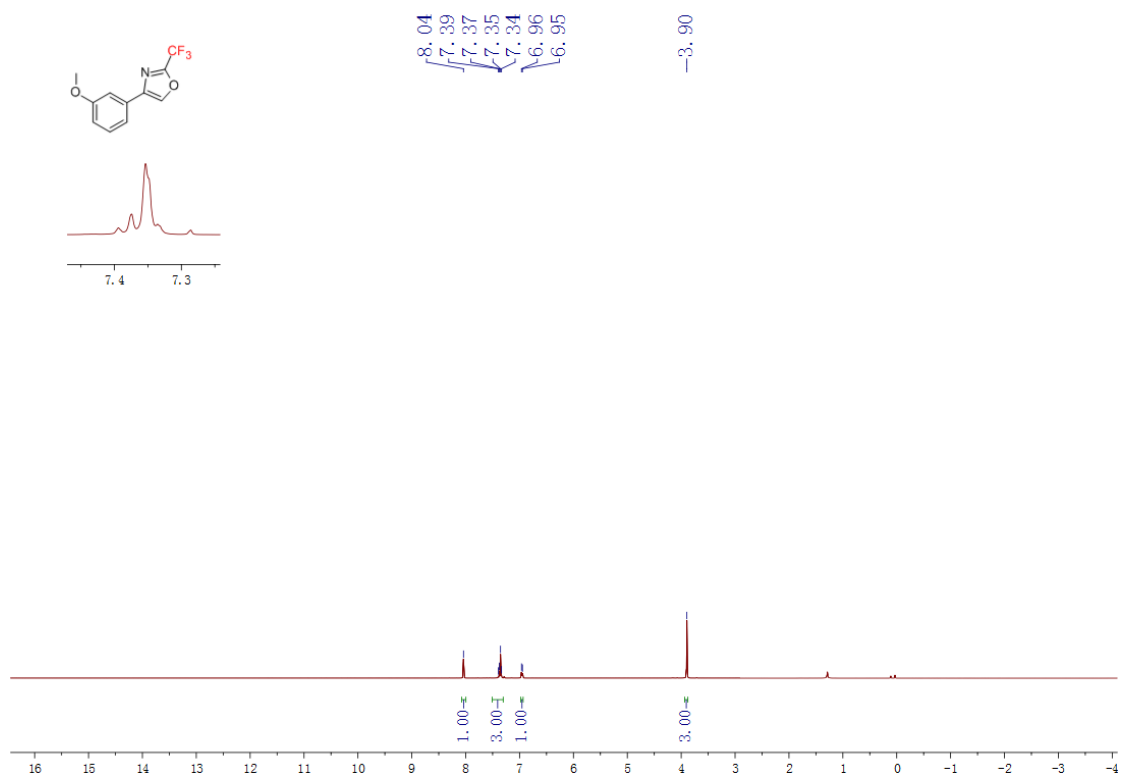

<sup>13</sup>C NMR spectrum of **3g** in CDCl<sub>3</sub>

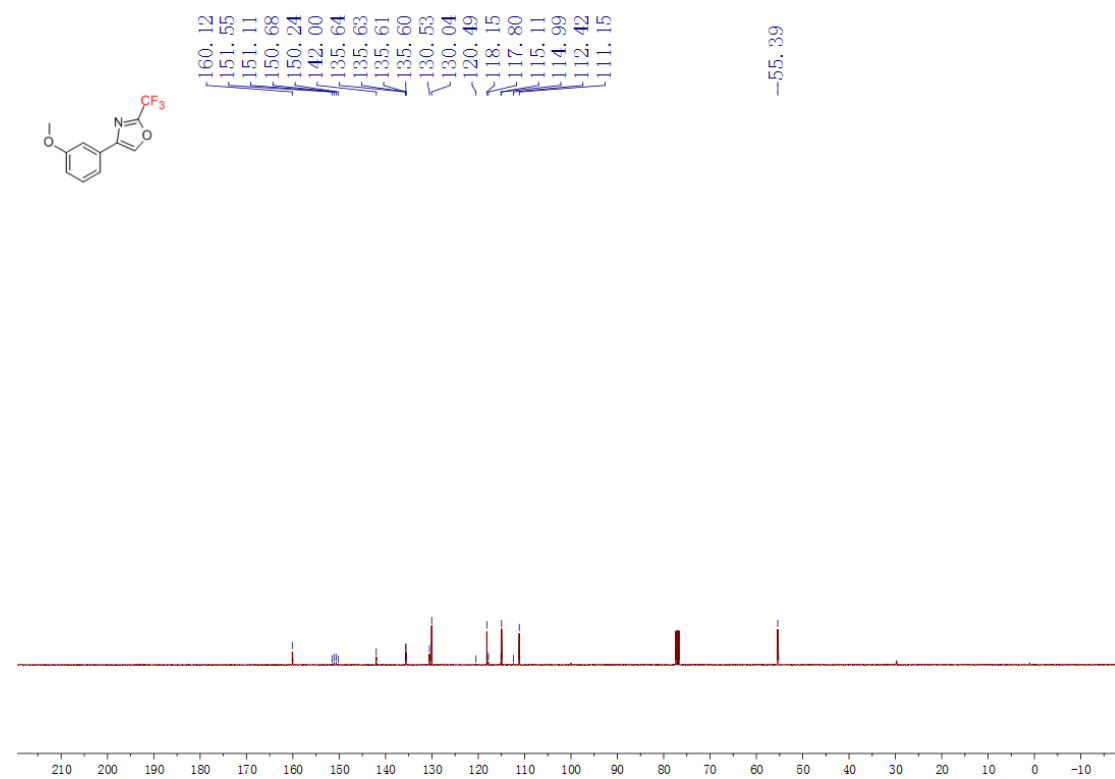

<sup>19</sup>F NMR spectrum of **3h** in CDCl<sub>3</sub>

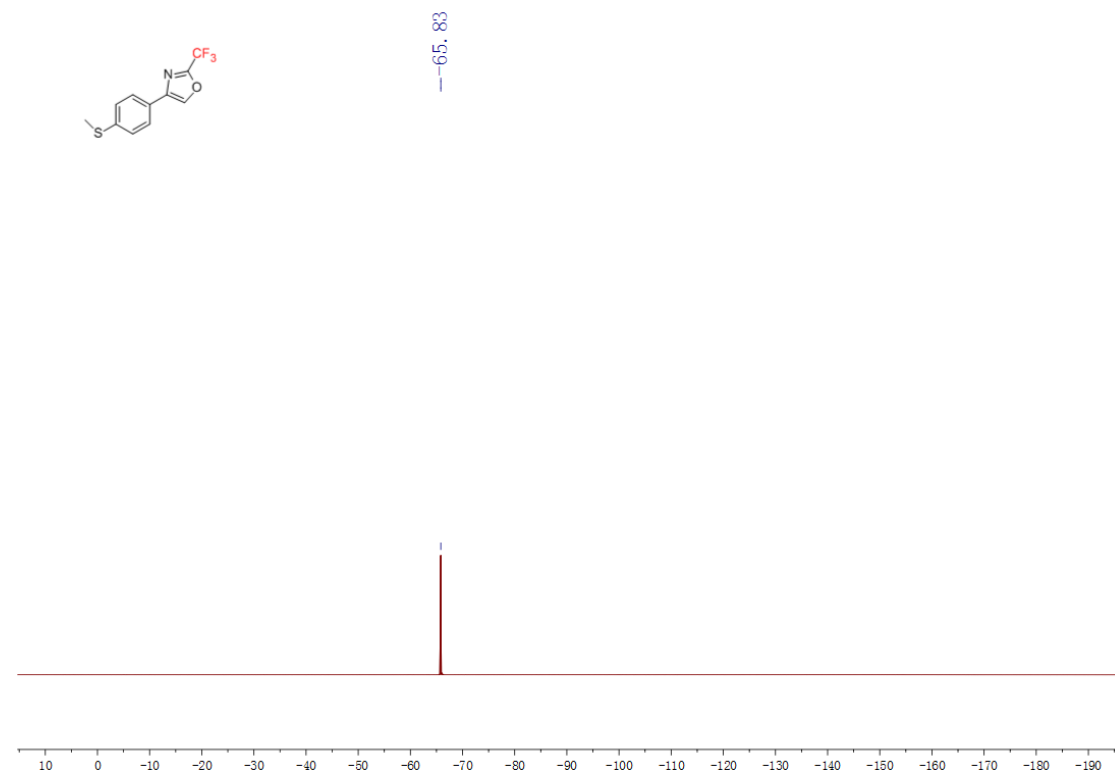

<sup>1</sup>H NMR spectrum of **3h** in CDCl<sub>3</sub>

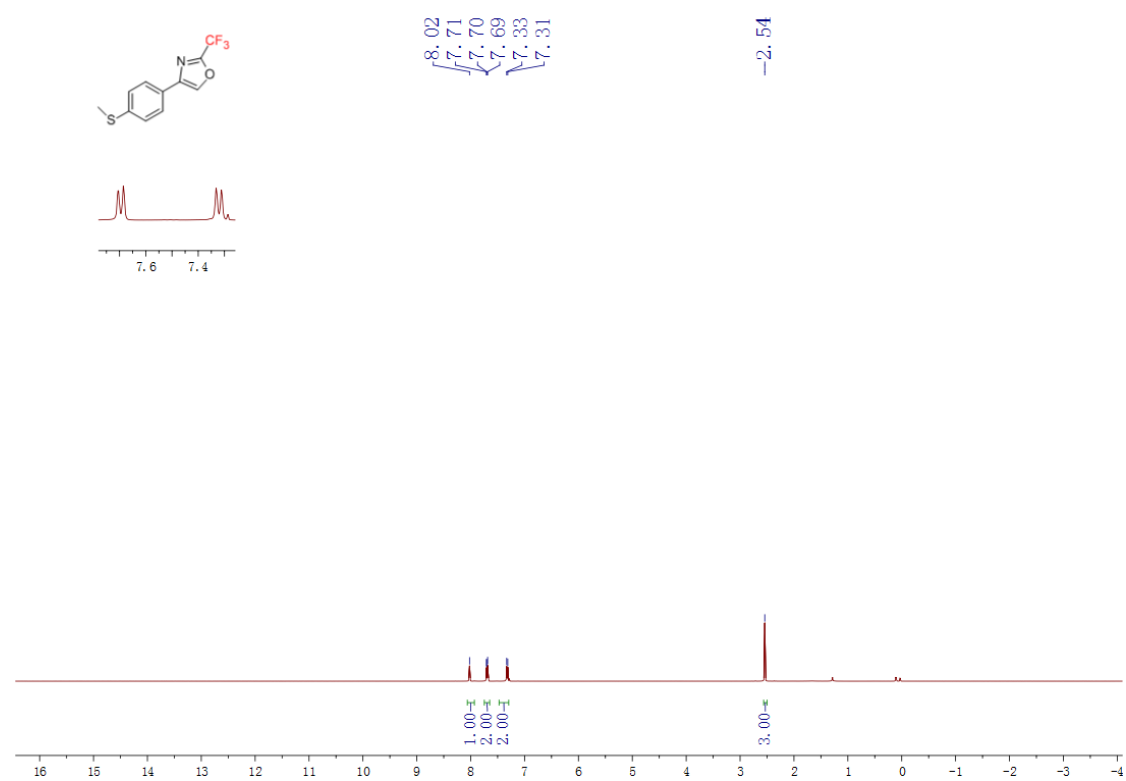

<sup>13</sup>C NMR spectrum of **3h** in CDCl<sub>3</sub>

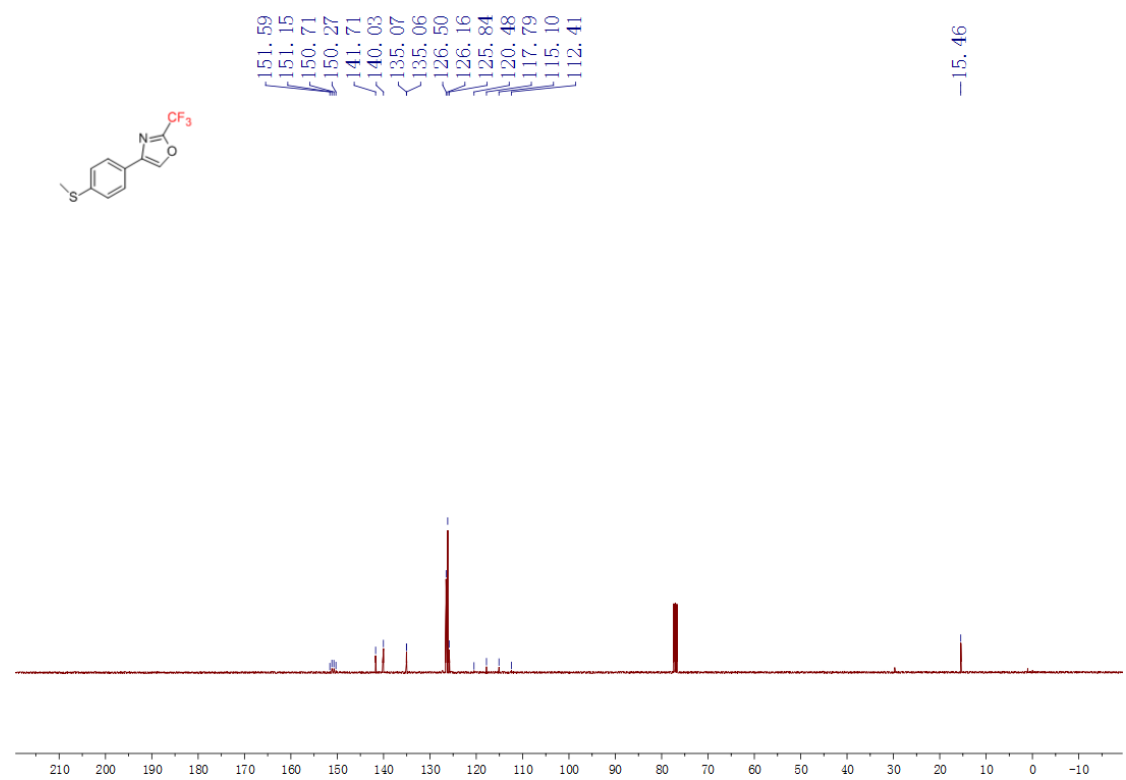

**<sup>19</sup>F NMR spectrum of 3i in CDCl<sub>3</sub>**

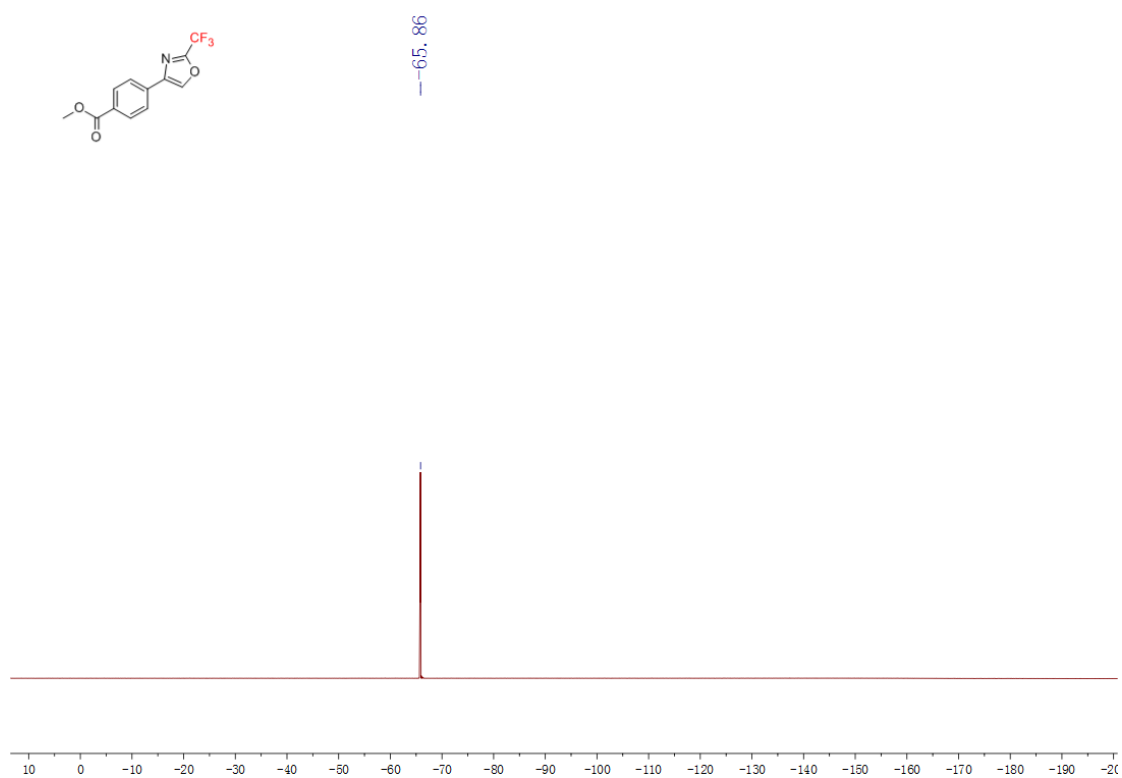

**<sup>1</sup>H NMR spectrum of 3i in CDCl<sub>3</sub>**

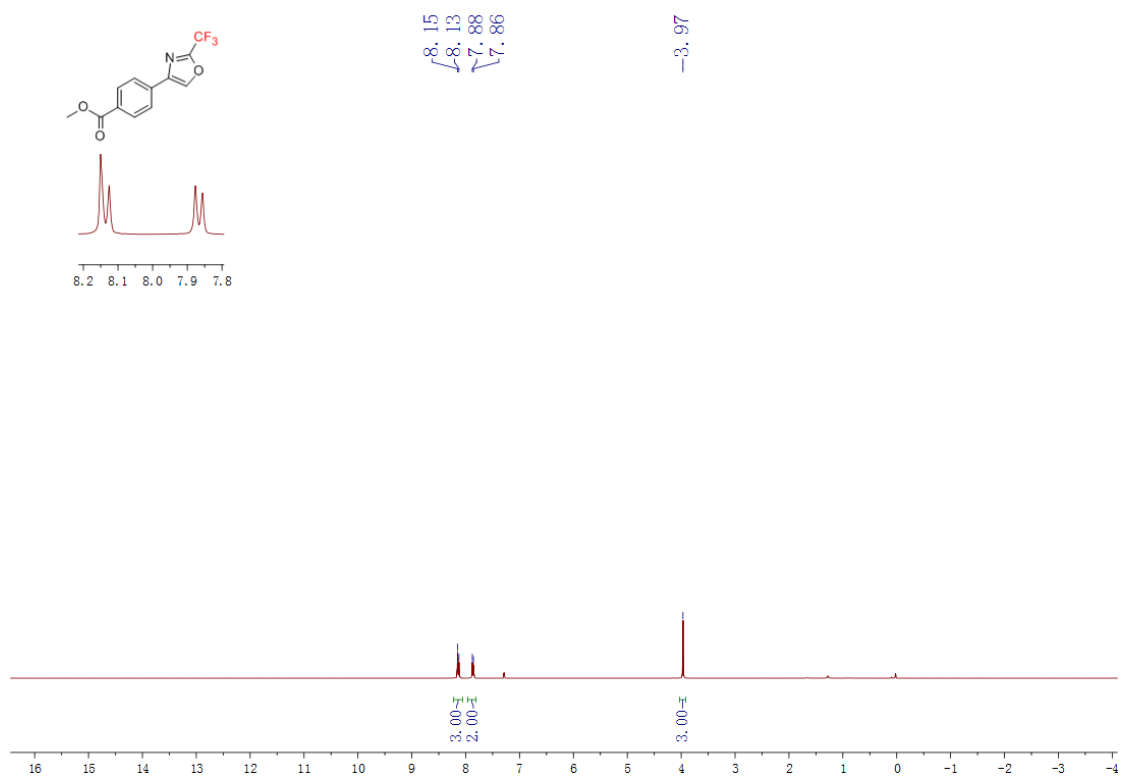

**<sup>13</sup>C NMR spectrum of 3i in CDCl<sub>3</sub>**

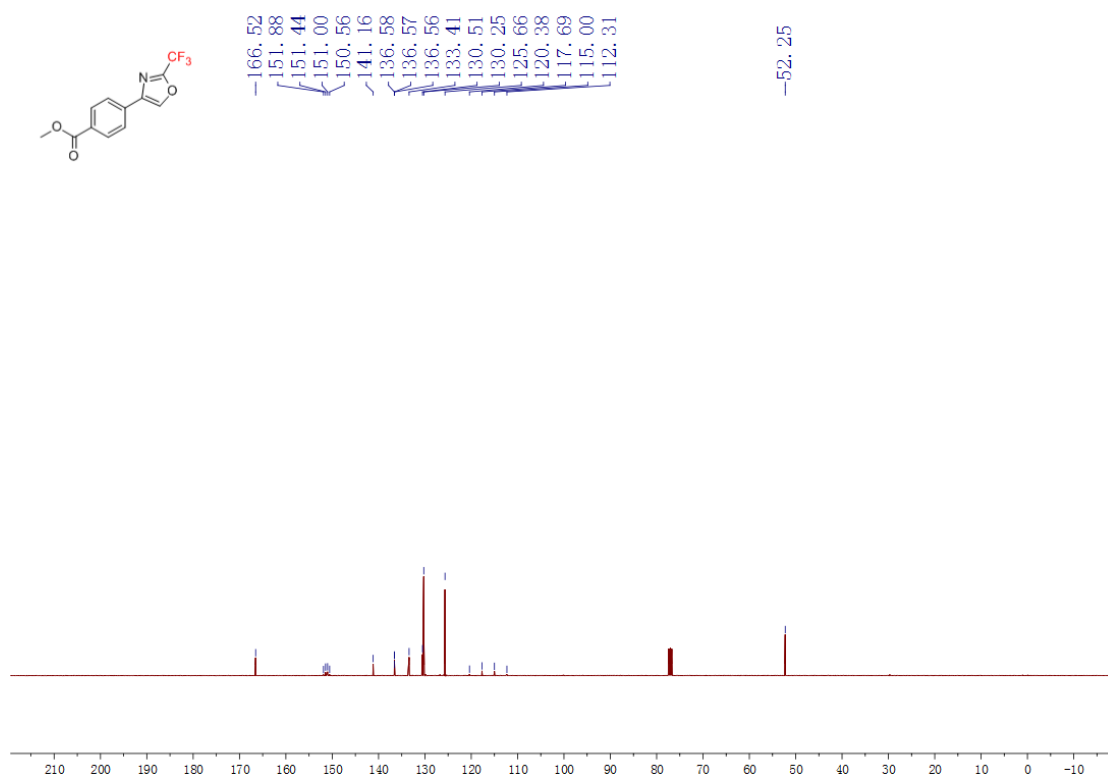

**<sup>19</sup>F NMR spectrum of 3j in CDCl<sub>3</sub>**

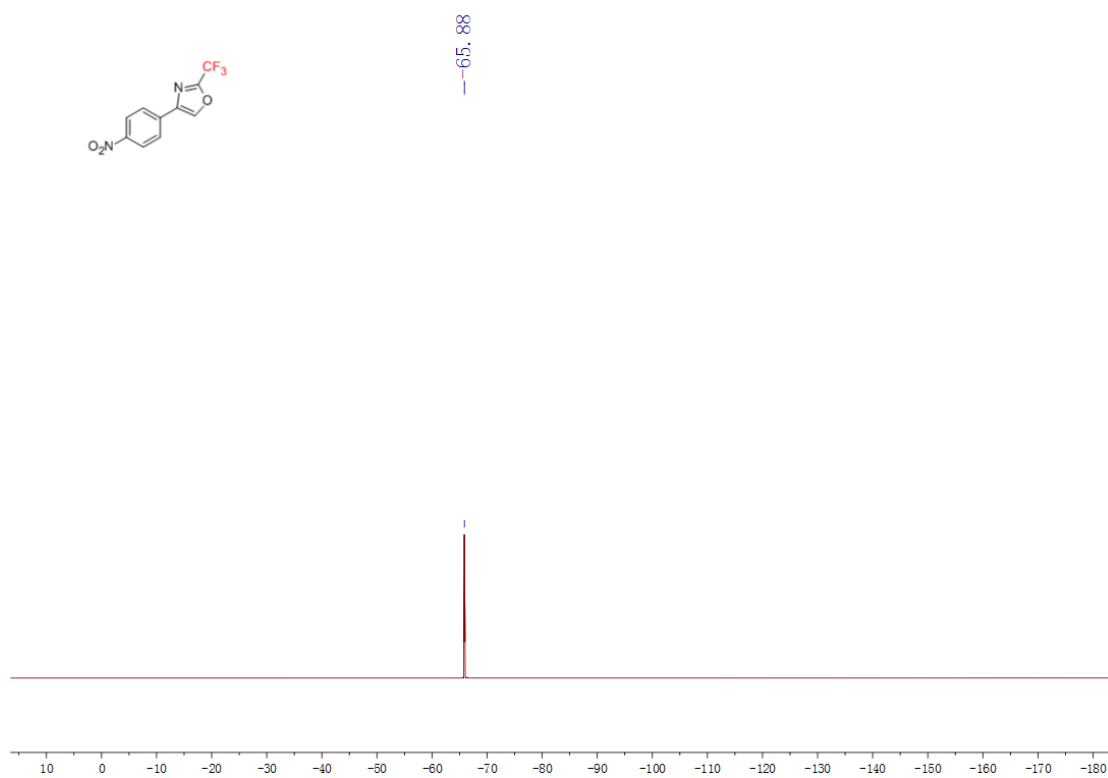

**<sup>1</sup>H NMR spectrum of 3j in CDCl<sub>3</sub>**

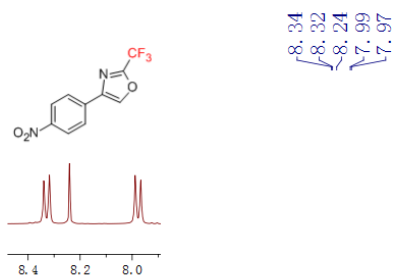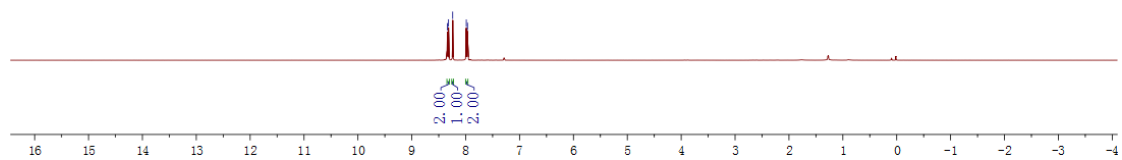

**<sup>13</sup>C NMR spectrum of 3j in CDCl<sub>3</sub>**

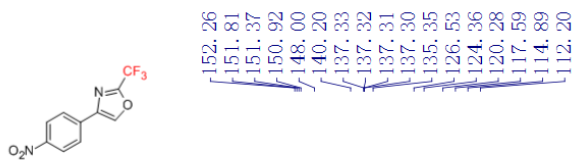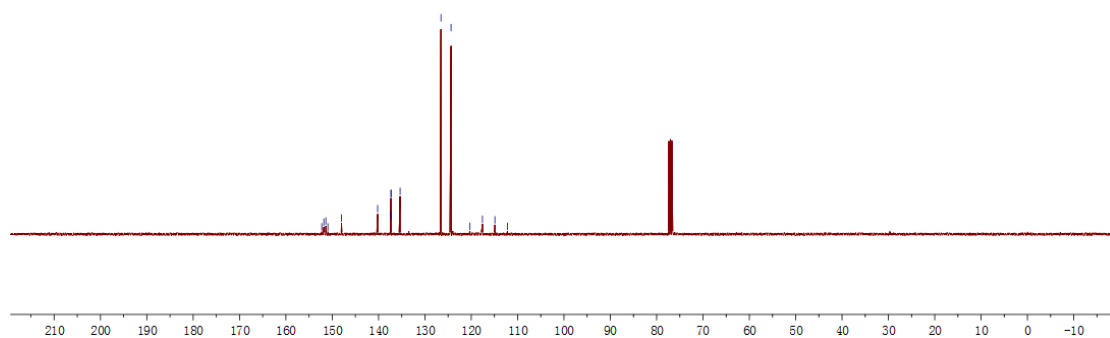

<sup>19</sup>F NMR spectrum of **3k** in CDCl<sub>3</sub>

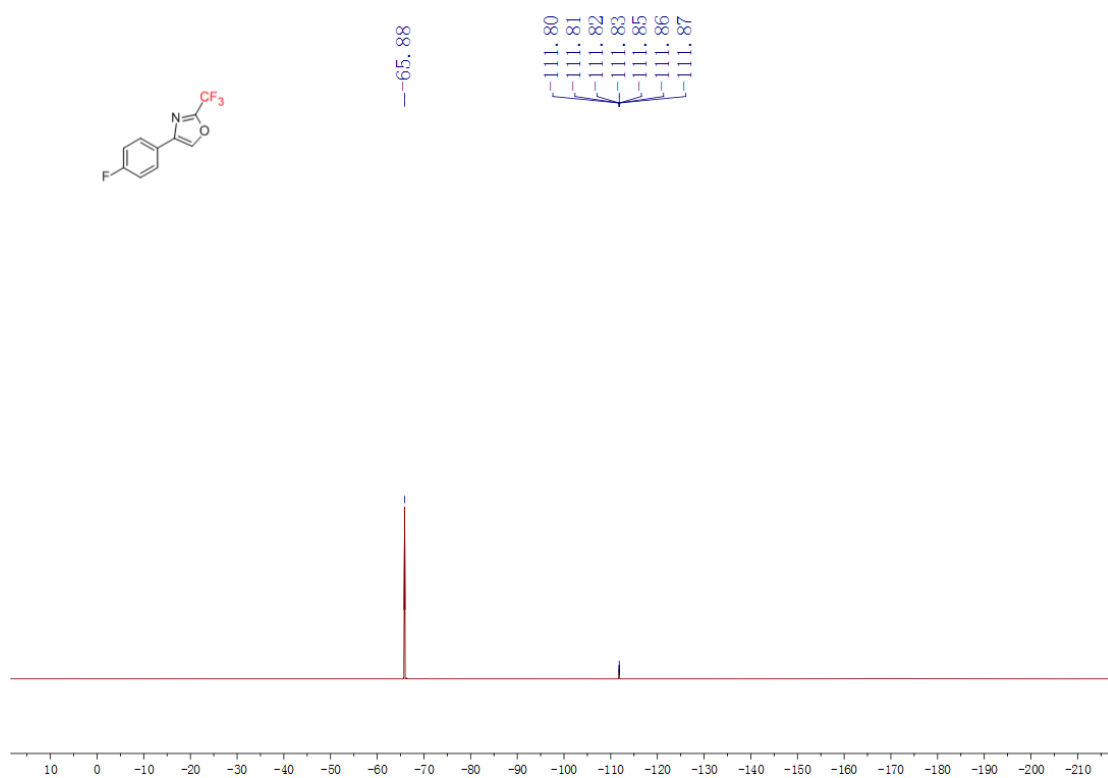

<sup>1</sup>H NMR spectrum of **3k** in CDCl<sub>3</sub>

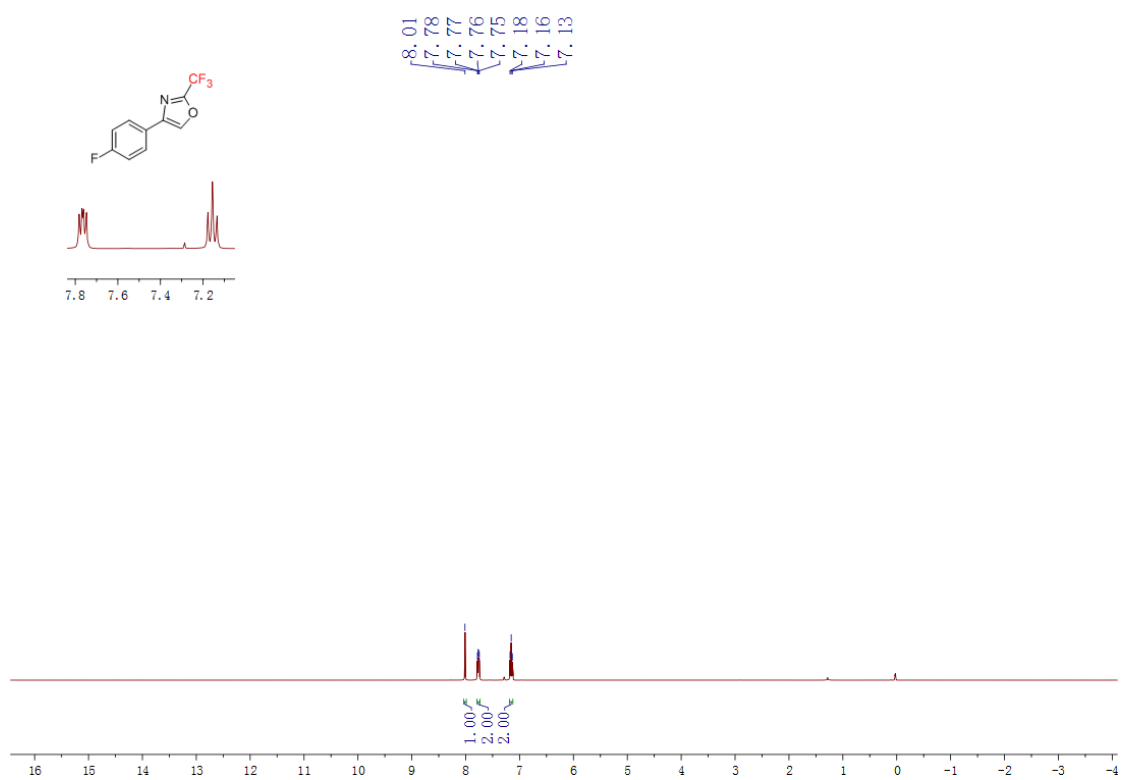

<sup>13</sup>C NMR spectrum of **3k** in CDCl<sub>3</sub>

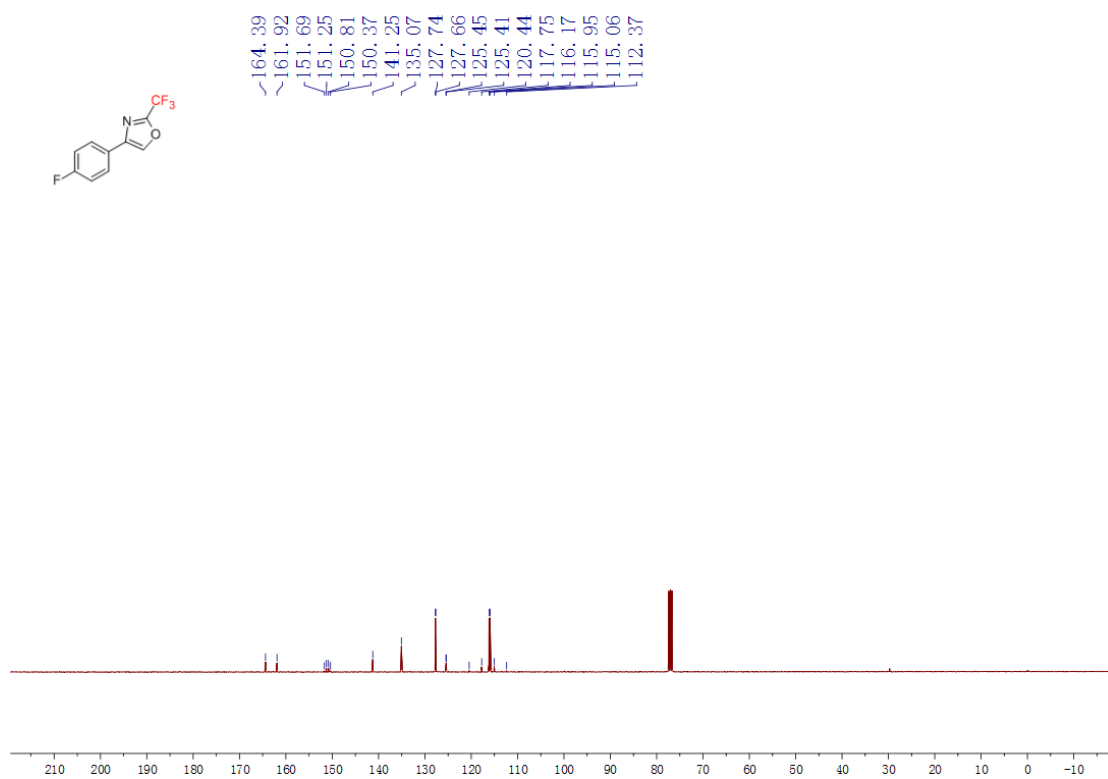

<sup>19</sup>F NMR spectrum of **3l** in CDCl<sub>3</sub>

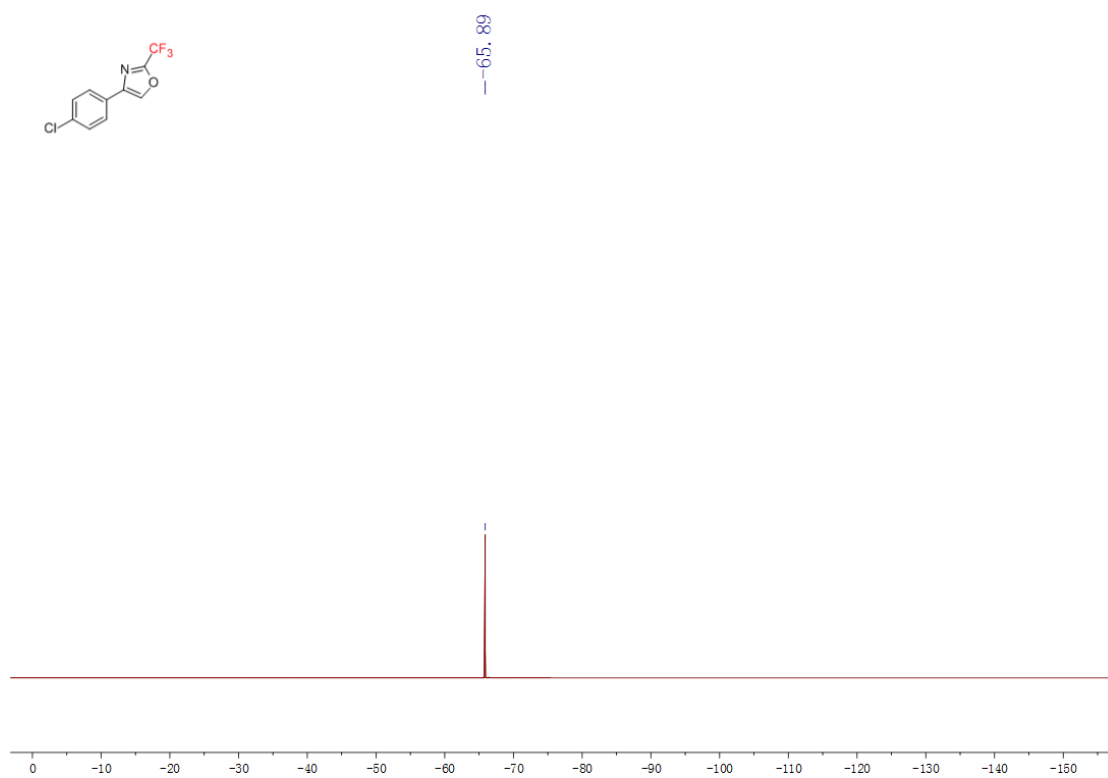



**<sup>1</sup>H NMR spectrum of 31 in CDCl<sub>3</sub>**

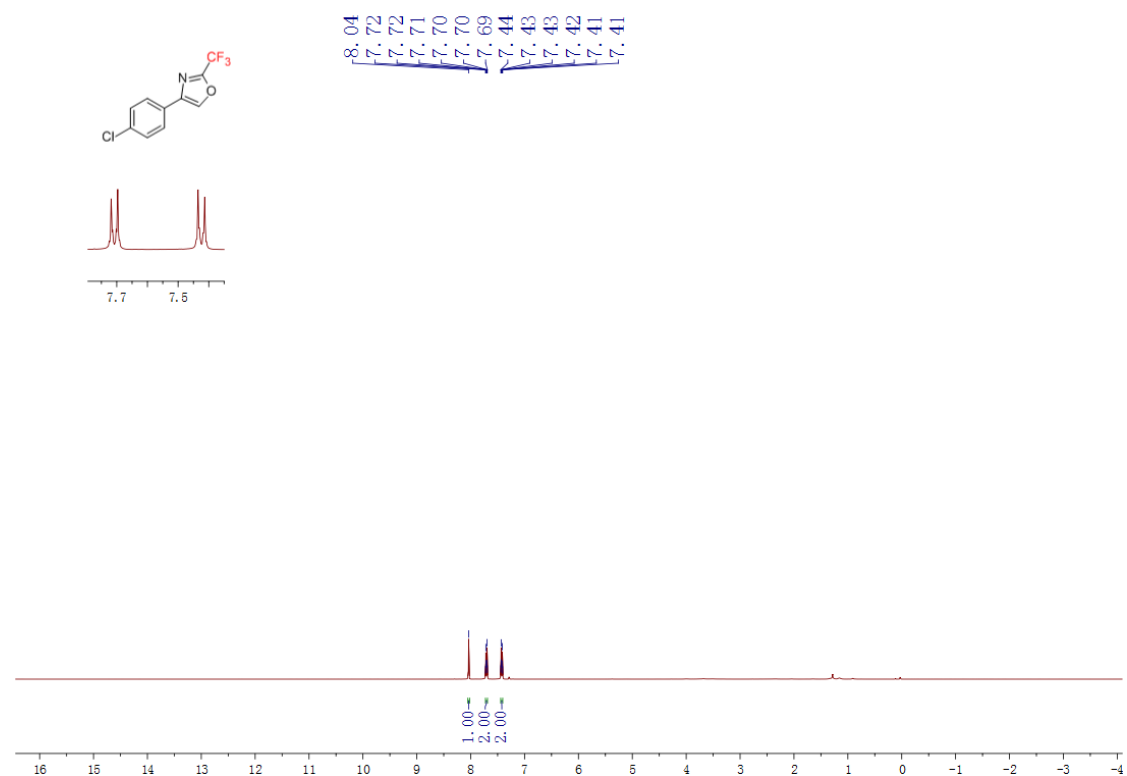

**<sup>13</sup>C NMR spectrum of 31 in CDCl<sub>3</sub>**

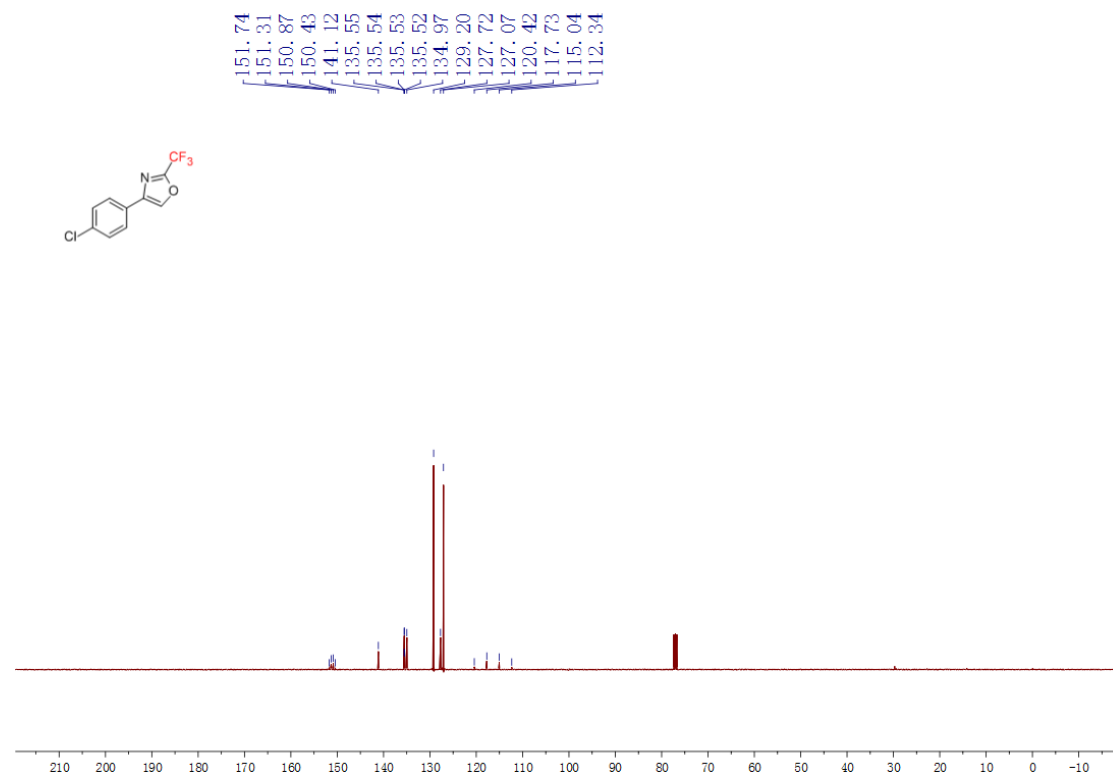

**<sup>19</sup>F NMR spectrum of 3m in CDCl<sub>3</sub>**

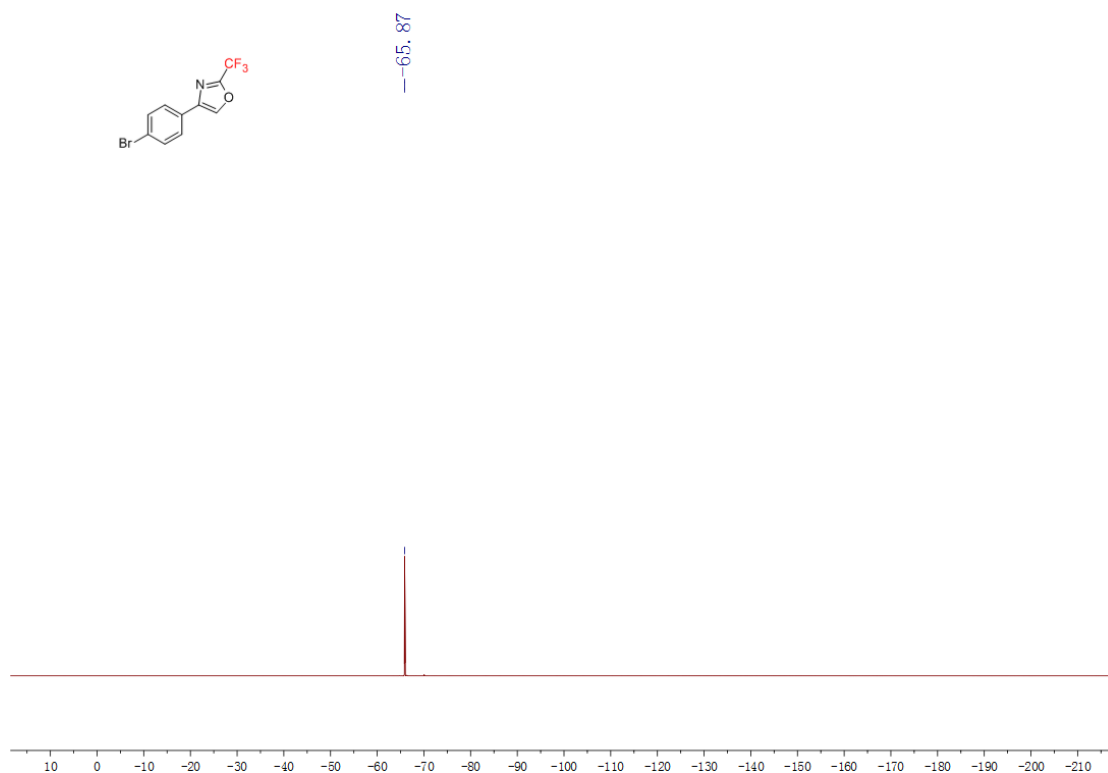

**<sup>1</sup>H NMR spectrum of 3m in CDCl<sub>3</sub>**

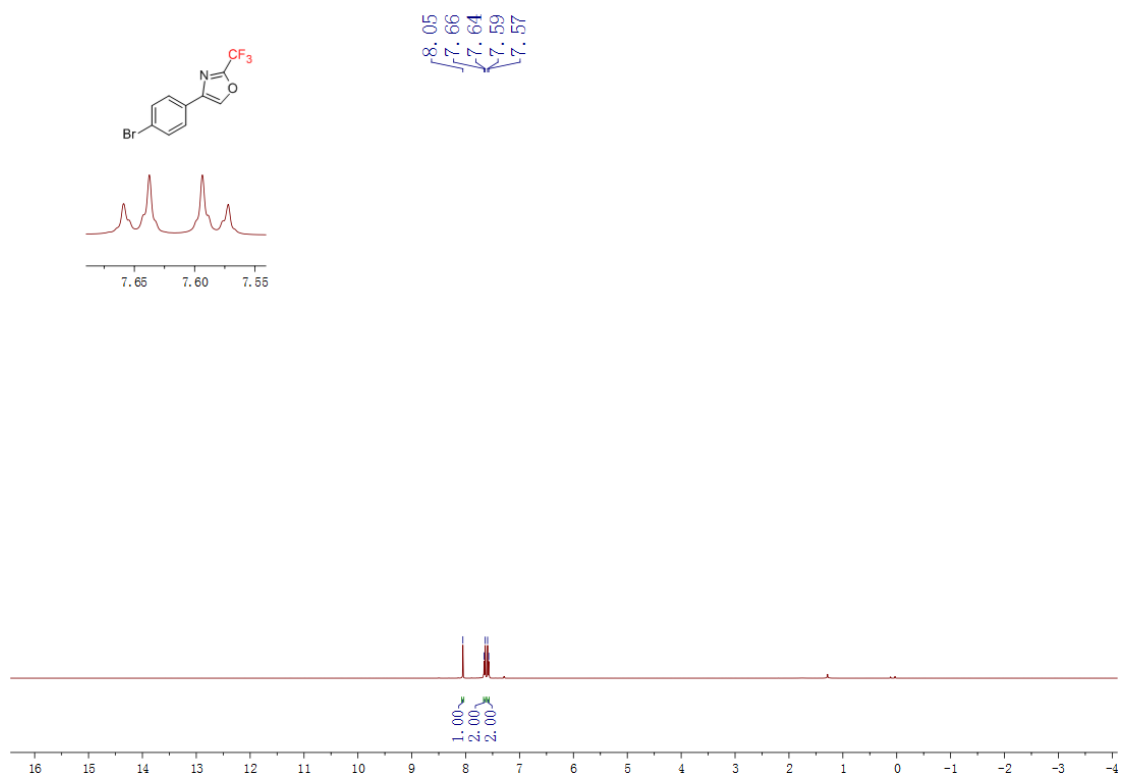

**<sup>13</sup>C NMR spectrum of 3m in CDCl<sub>3</sub>**

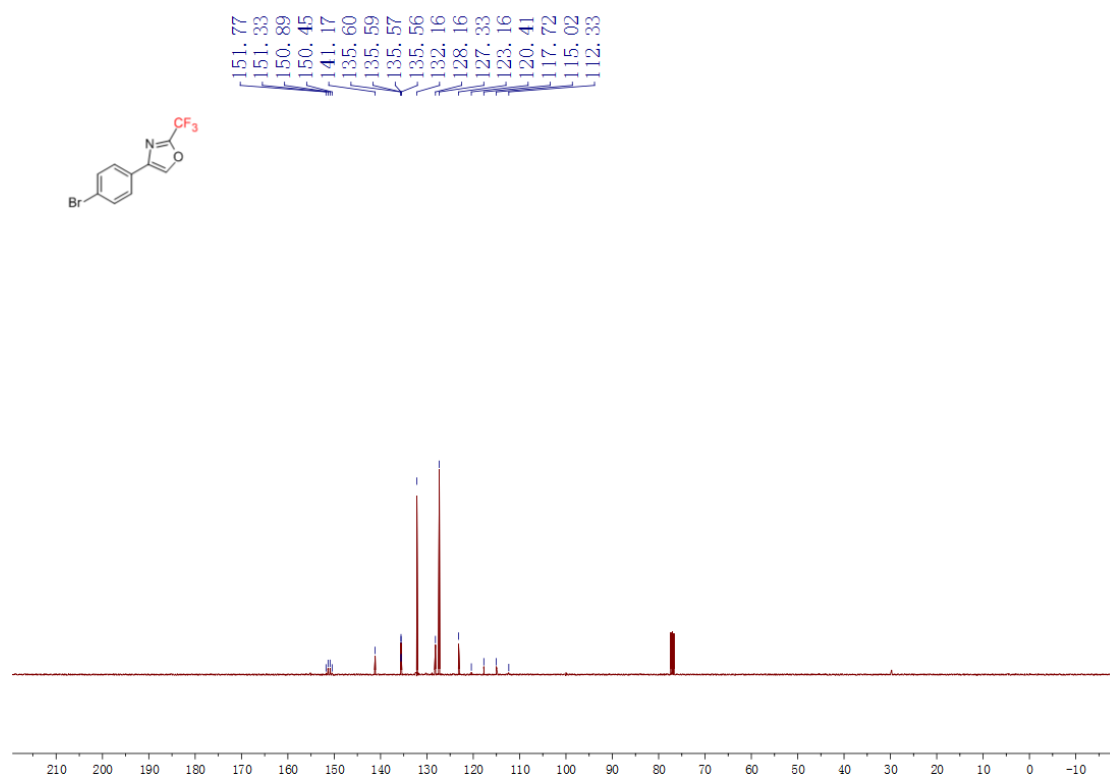

**<sup>19</sup>F NMR spectrum of 3n in CDCl<sub>3</sub>**

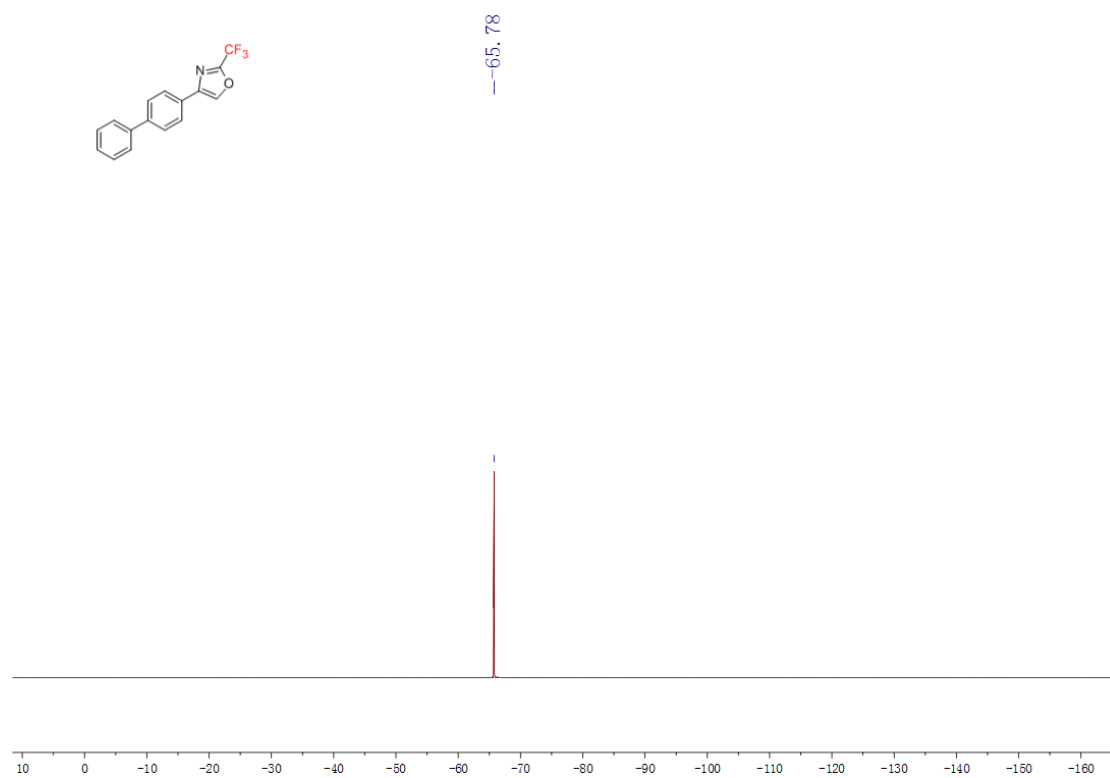

**<sup>1</sup>H NMR spectrum of 3n in CDCl<sub>3</sub>**

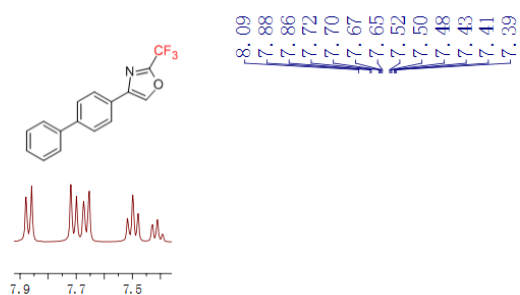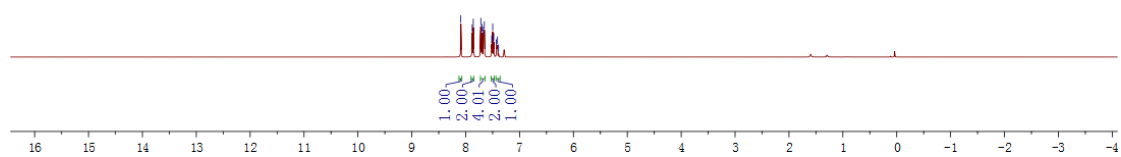

**<sup>13</sup>C NMR spectrum of 3n in CDCl<sub>3</sub>**

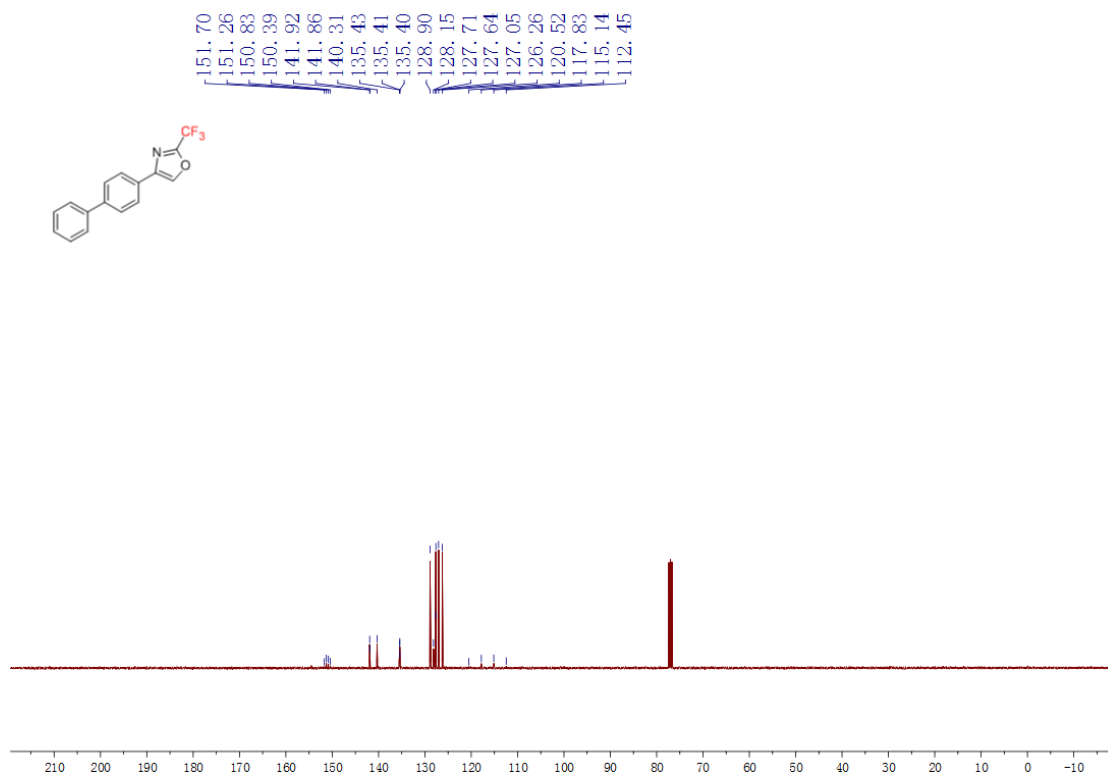

**<sup>19</sup>F NMR spectrum of 3o in CDCl<sub>3</sub>**

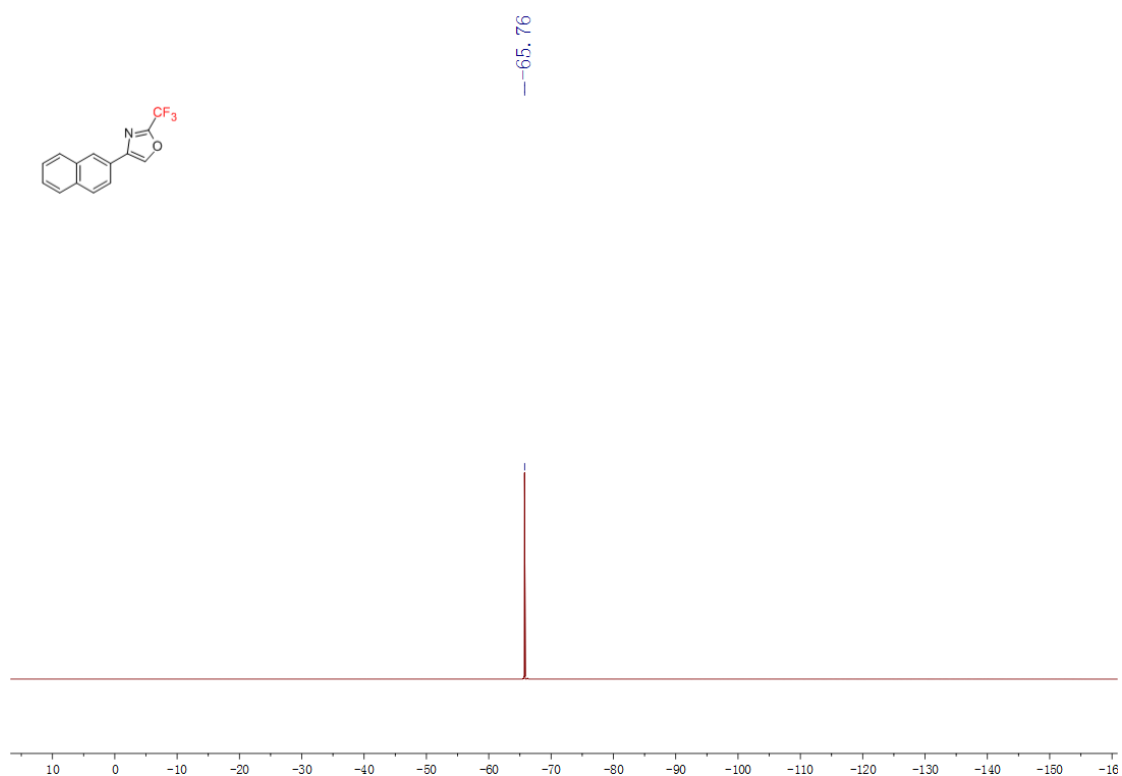

**<sup>1</sup>H NMR spectrum of 3o in CDCl<sub>3</sub>**

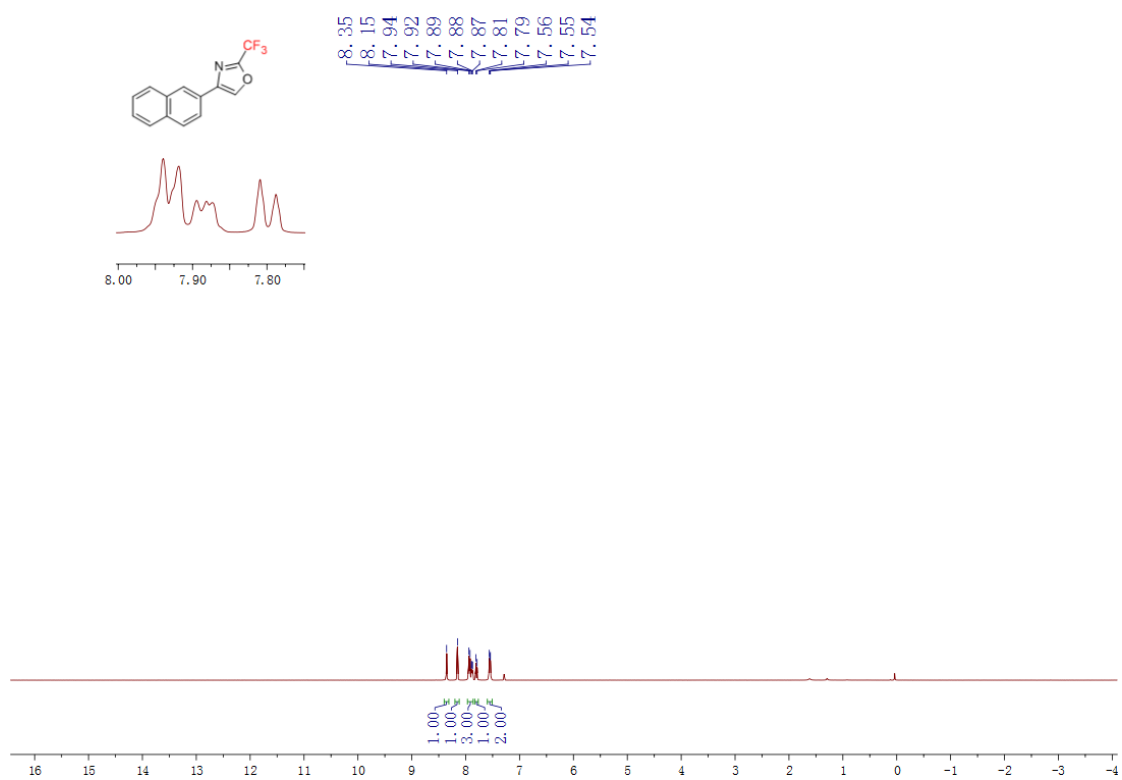

**<sup>13</sup>C NMR spectrum of 3o in CDCl<sub>3</sub>**

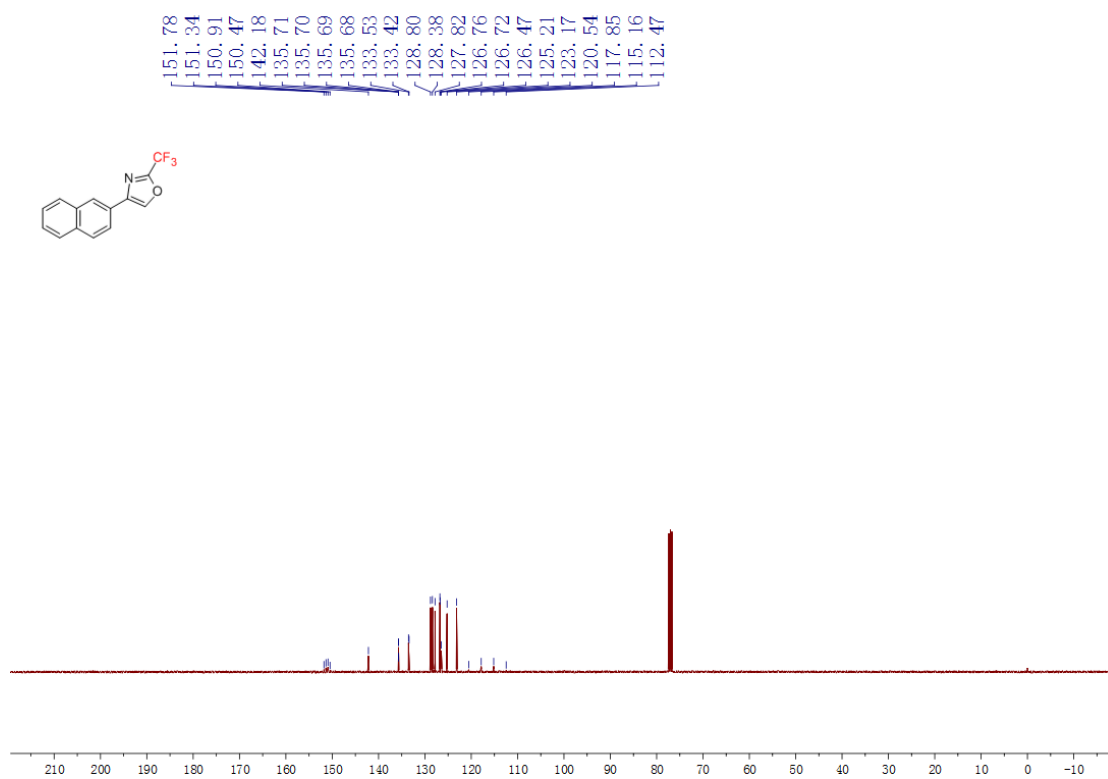

**<sup>19</sup>F NMR spectrum of 3p in CDCl<sub>3</sub>**

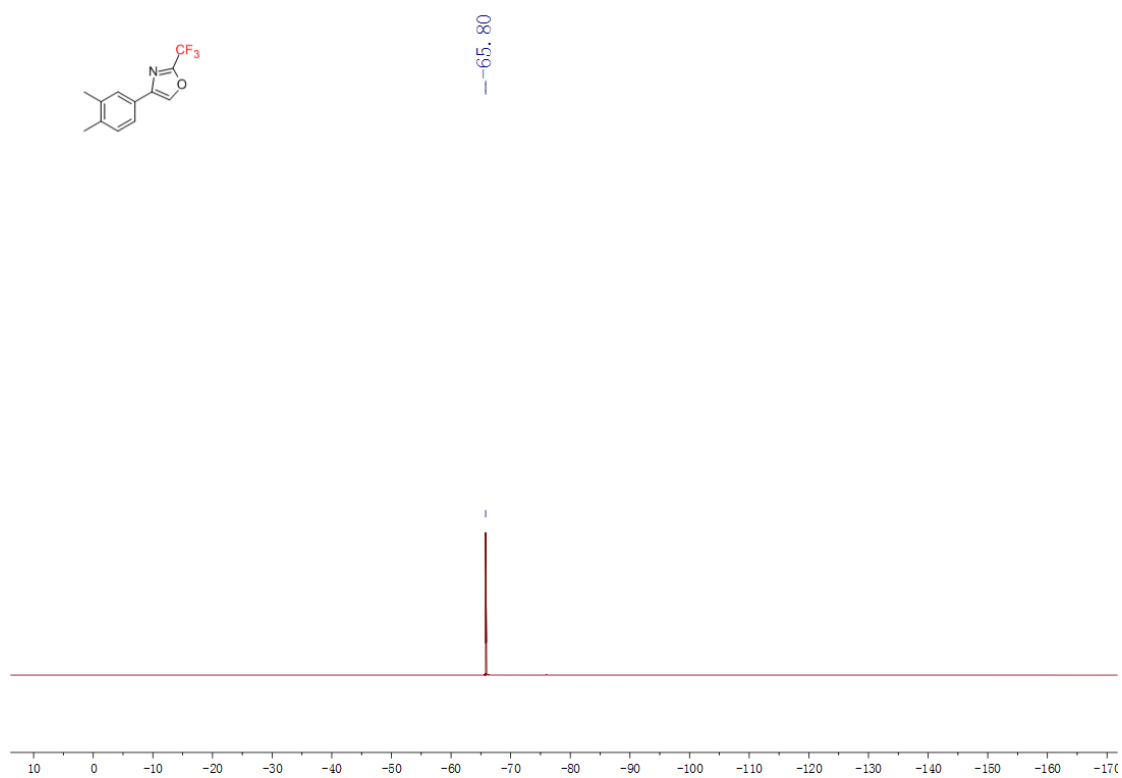

**<sup>1</sup>H NMR spectrum of 3p in CDCl<sub>3</sub>**

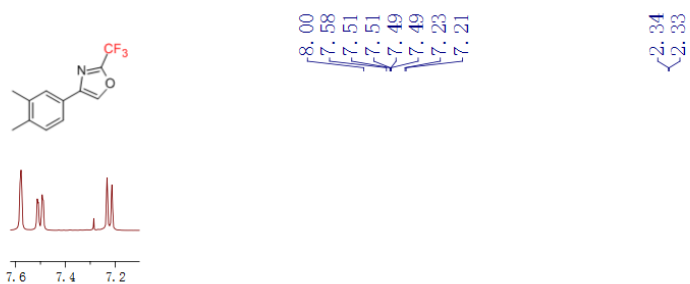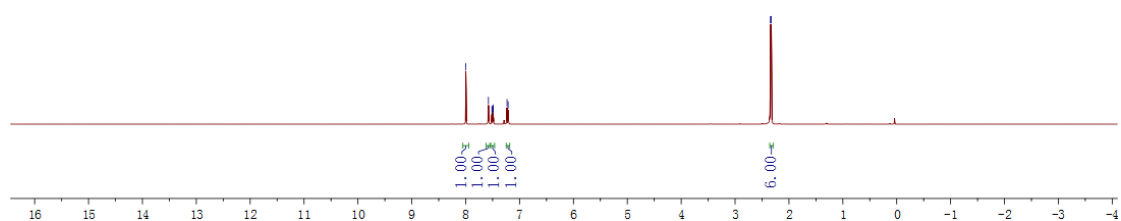

**<sup>13</sup>C NMR spectrum of 3p in CDCl<sub>3</sub>**

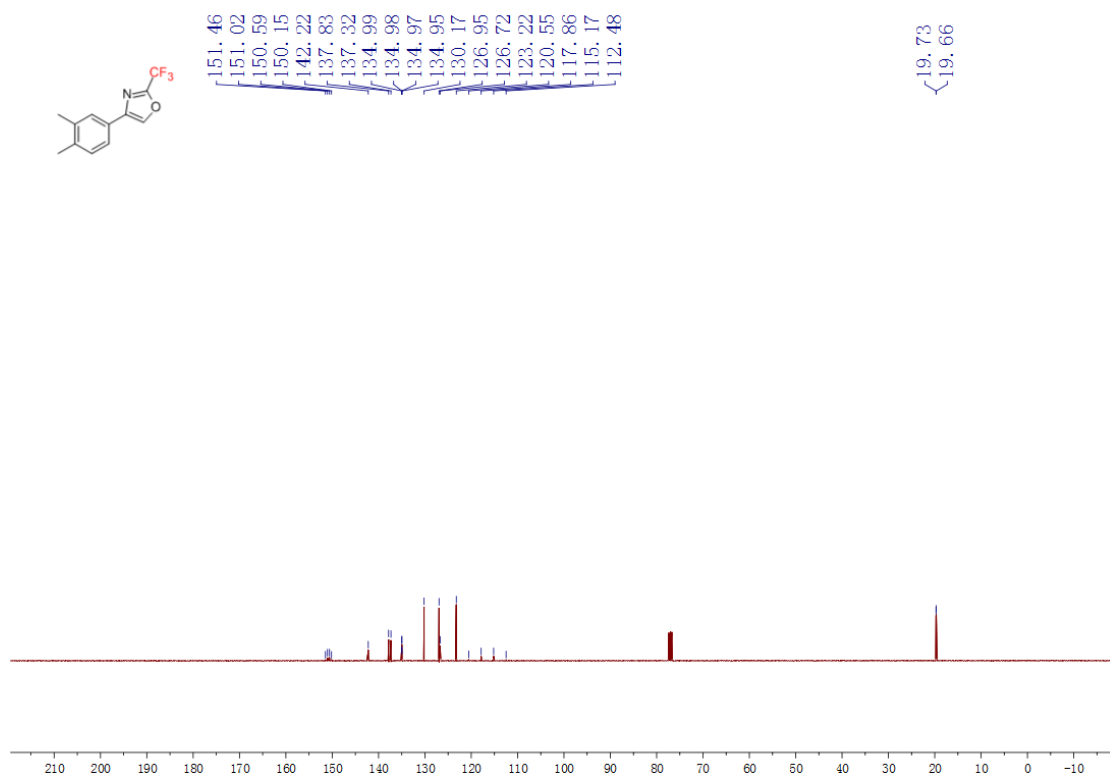

**<sup>19</sup>F NMR spectrum of 3q in CDCl<sub>3</sub>**

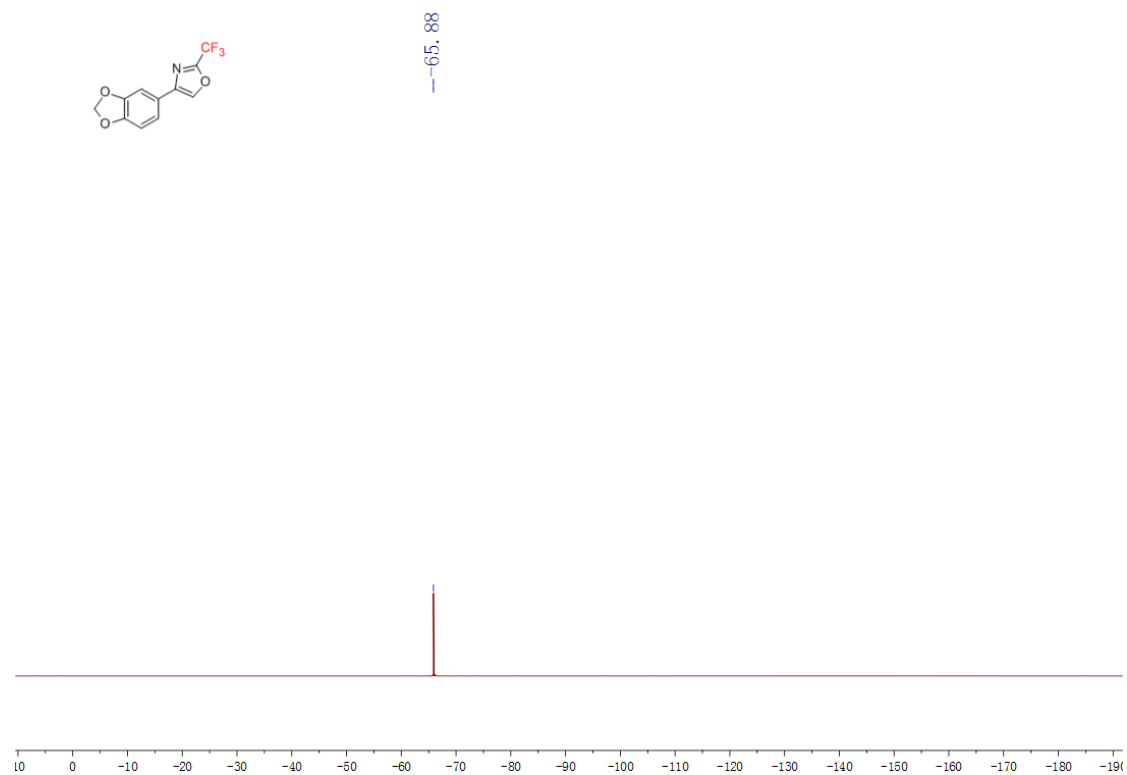

**<sup>1</sup>H NMR spectrum of 3q in CDCl<sub>3</sub>**

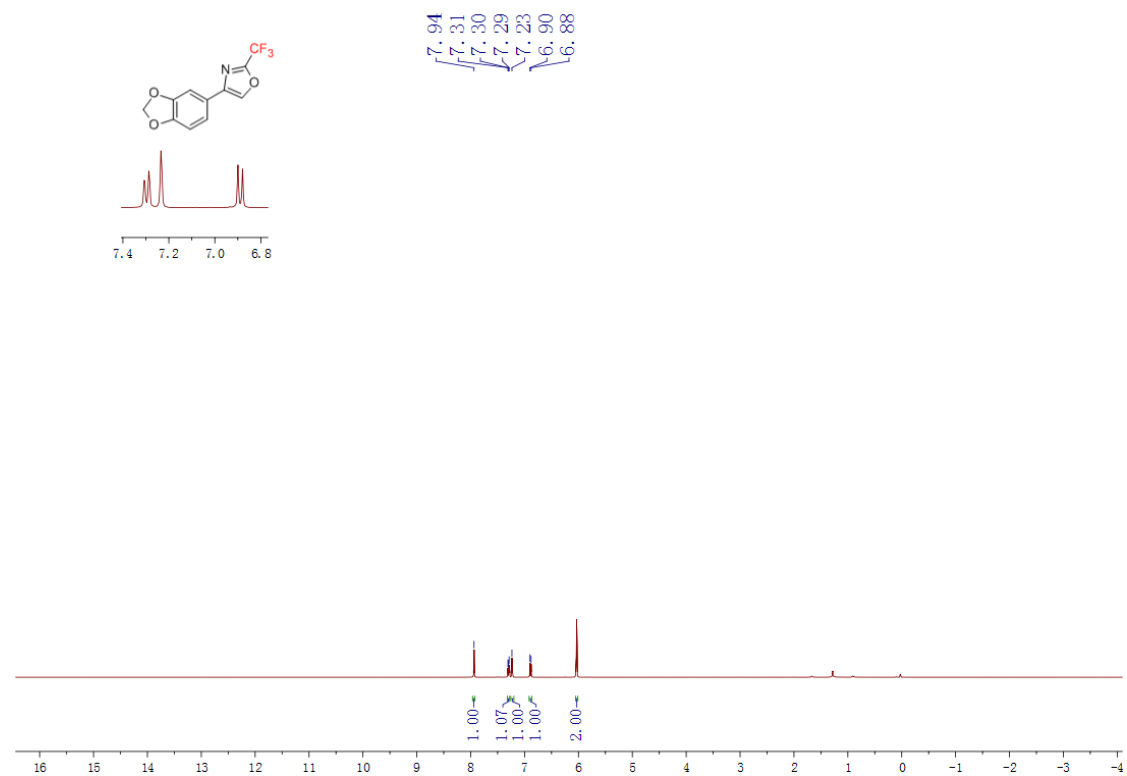



**<sup>13</sup>C NMR spectrum of 3q in CDCl<sub>3</sub>**

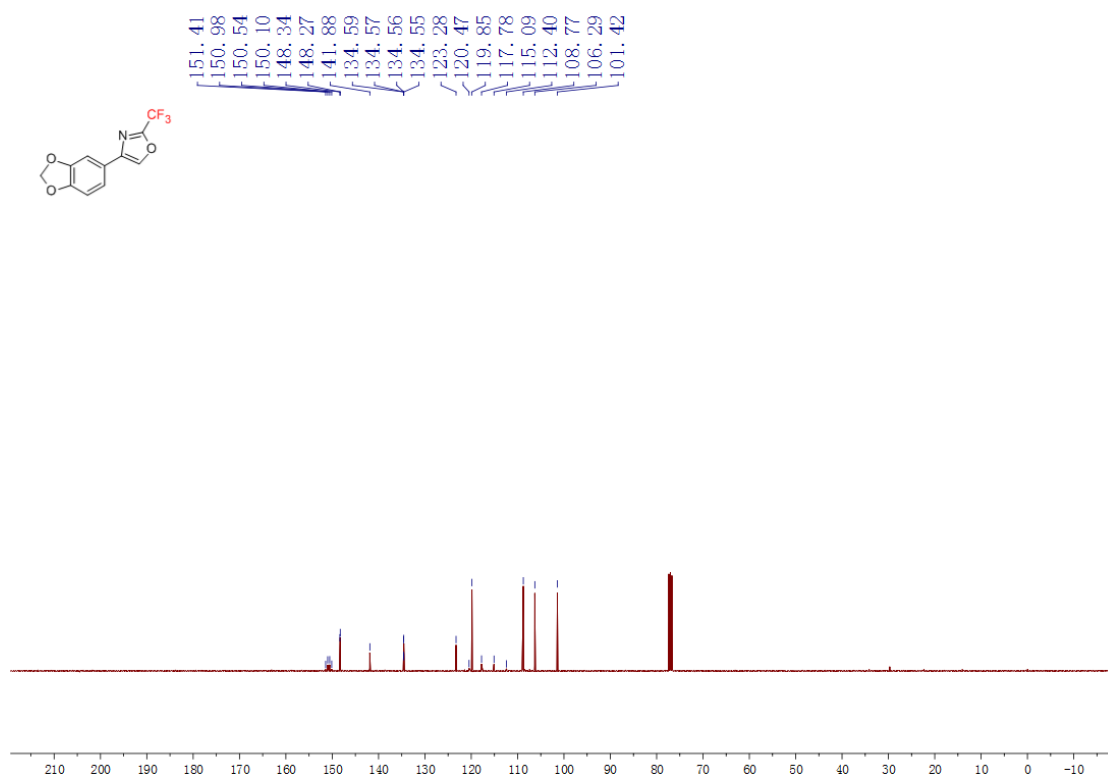

**<sup>19</sup>F NMR spectrum of 3r in CDCl<sub>3</sub>**

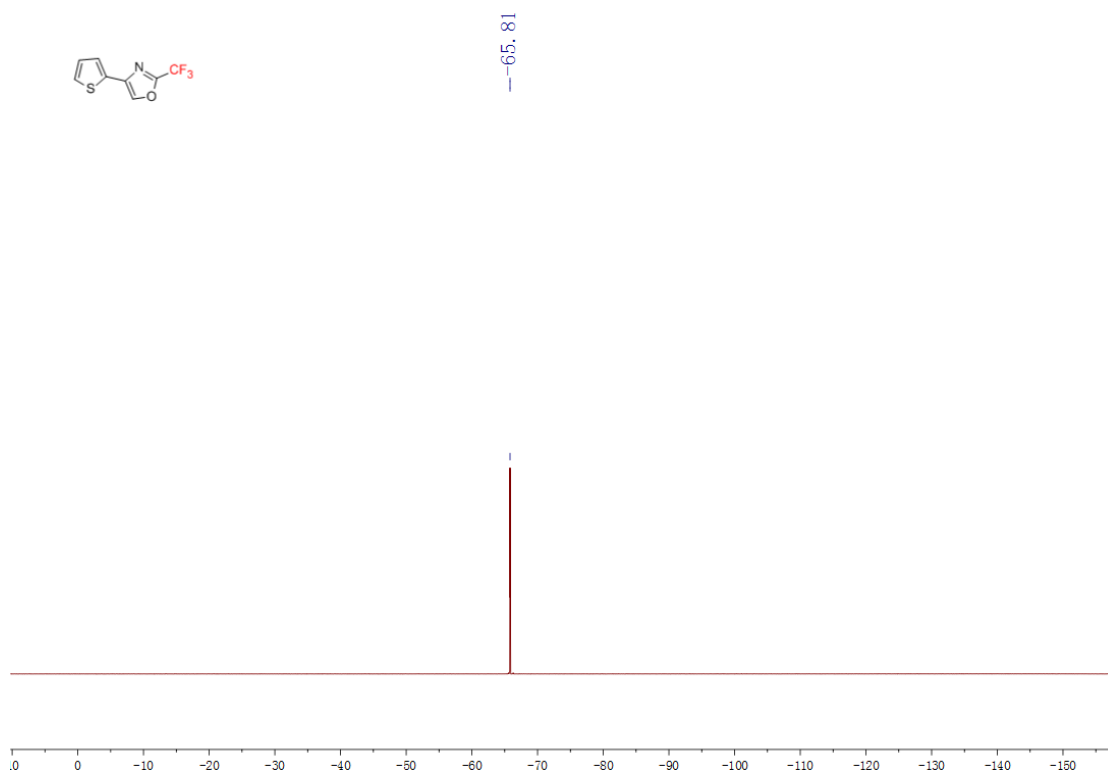

**<sup>1</sup>H NMR spectrum of 3r in CDCl<sub>3</sub>**

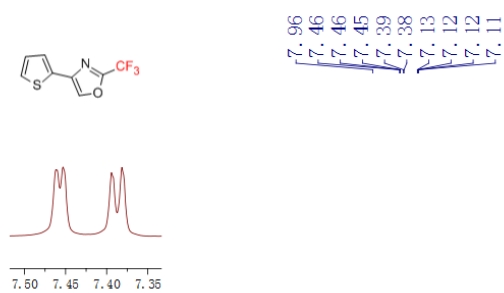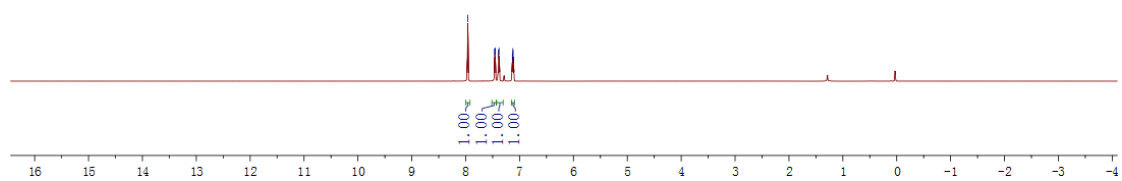

**<sup>13</sup>C NMR spectrum of 3r in CDCl<sub>3</sub>**

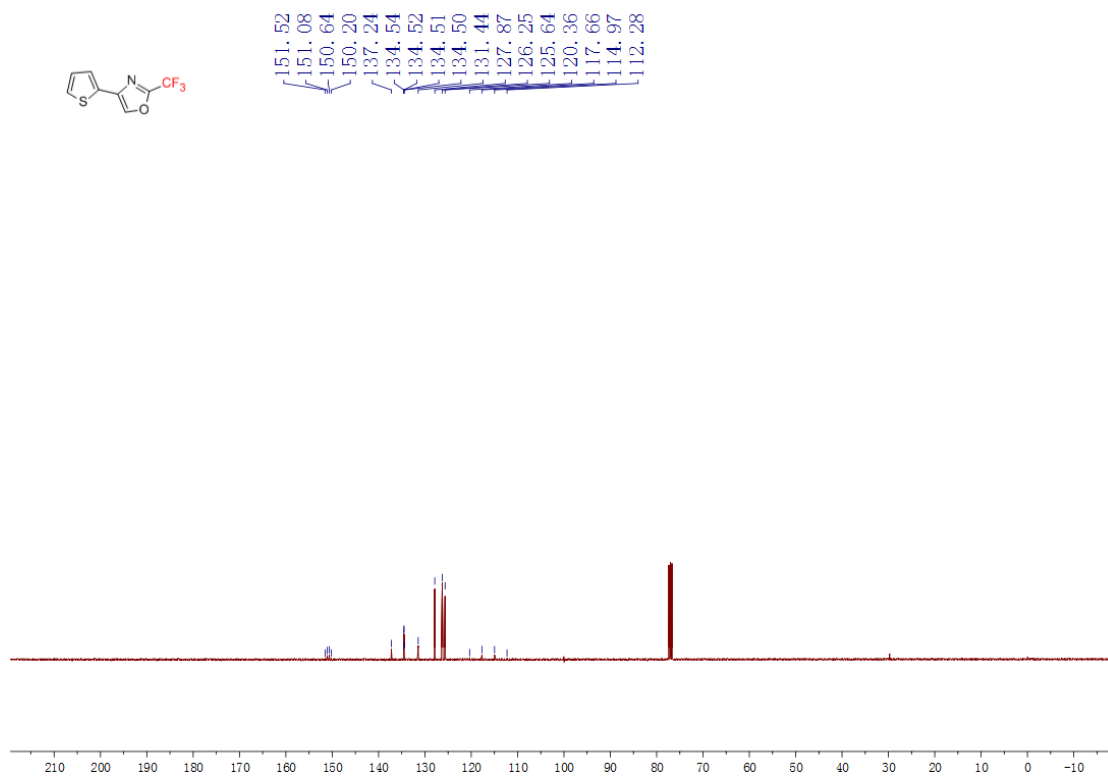

<sup>19</sup>F NMR spectrum of **3s** in CDCl<sub>3</sub>

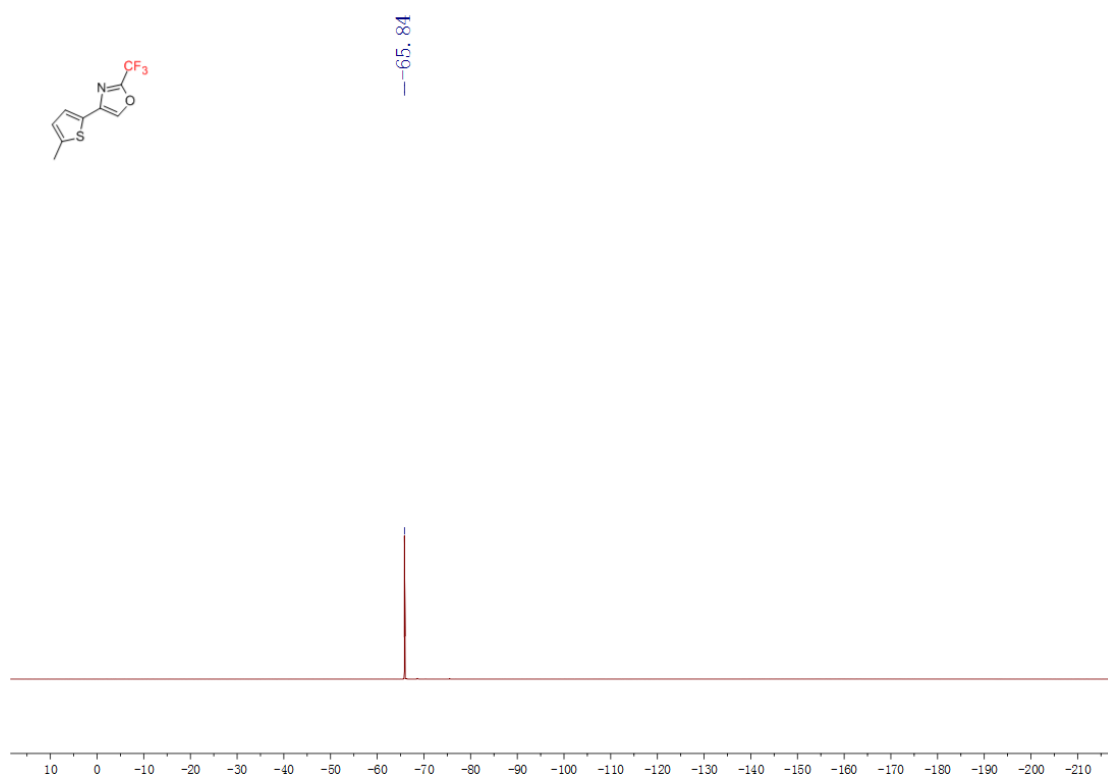

<sup>1</sup>H NMR spectrum of **3s** in CDCl<sub>3</sub>

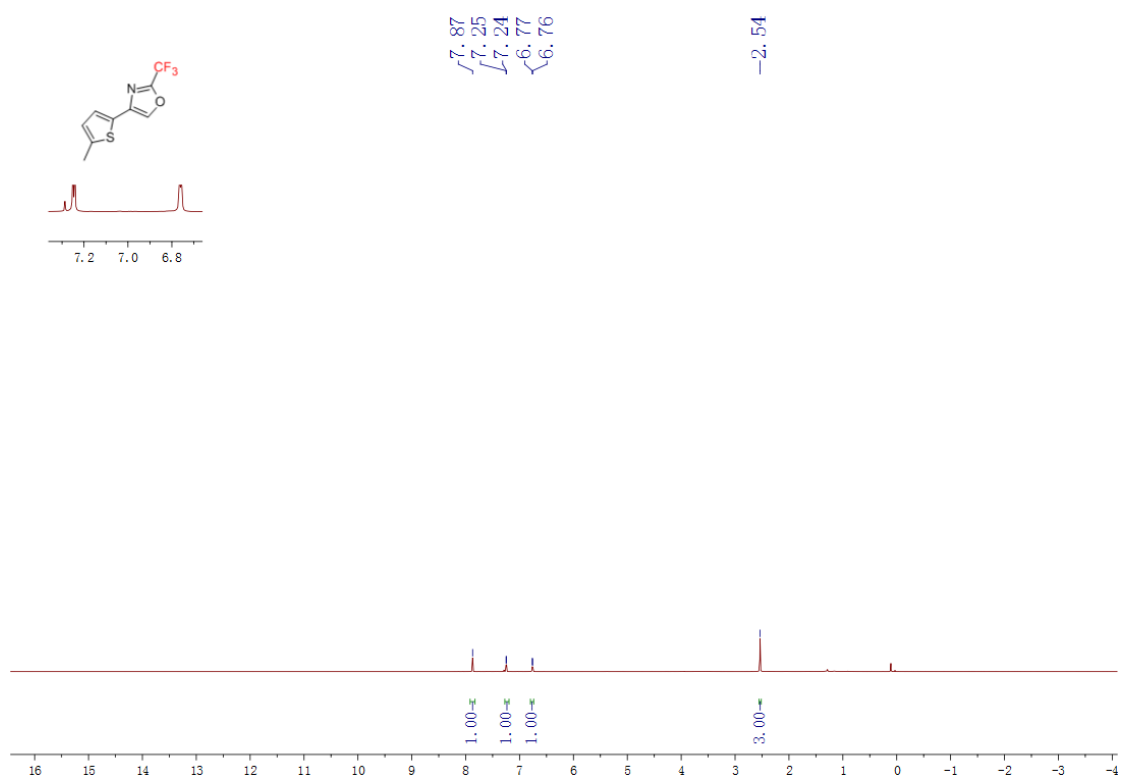

**<sup>13</sup>C NMR spectrum of 3s in CDCl<sub>3</sub>**

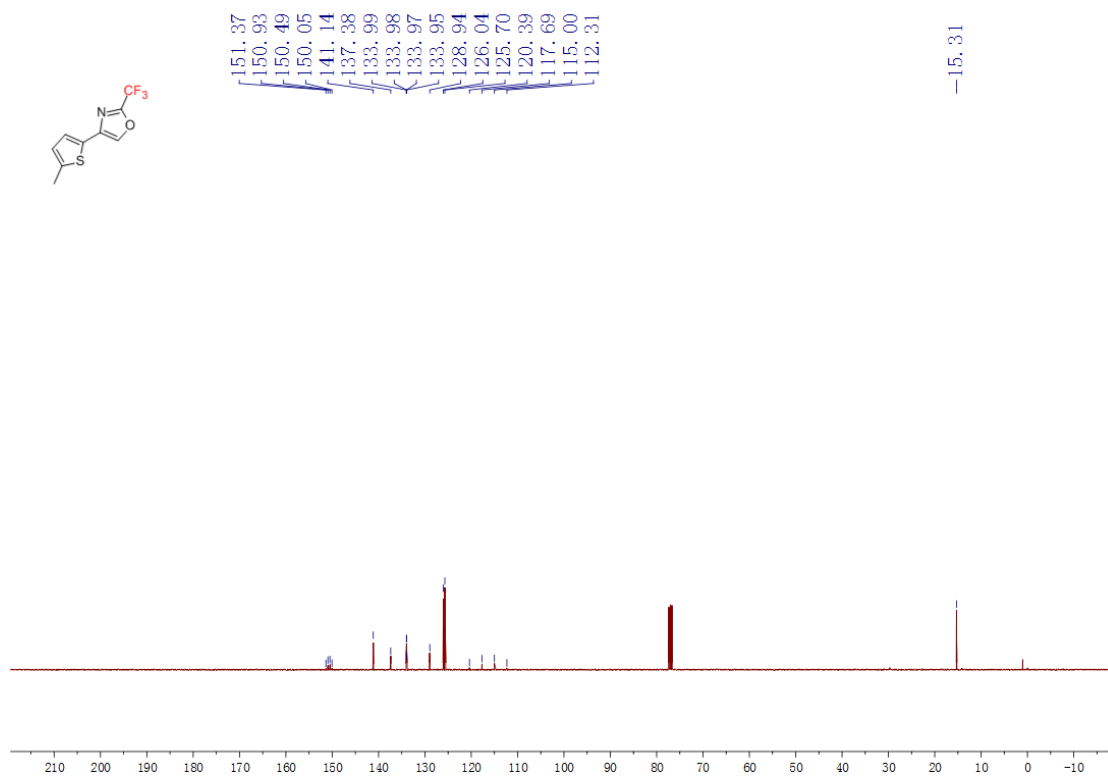

**<sup>19</sup>F NMR spectrum of 3t in acetone-*d*<sub>6</sub>**

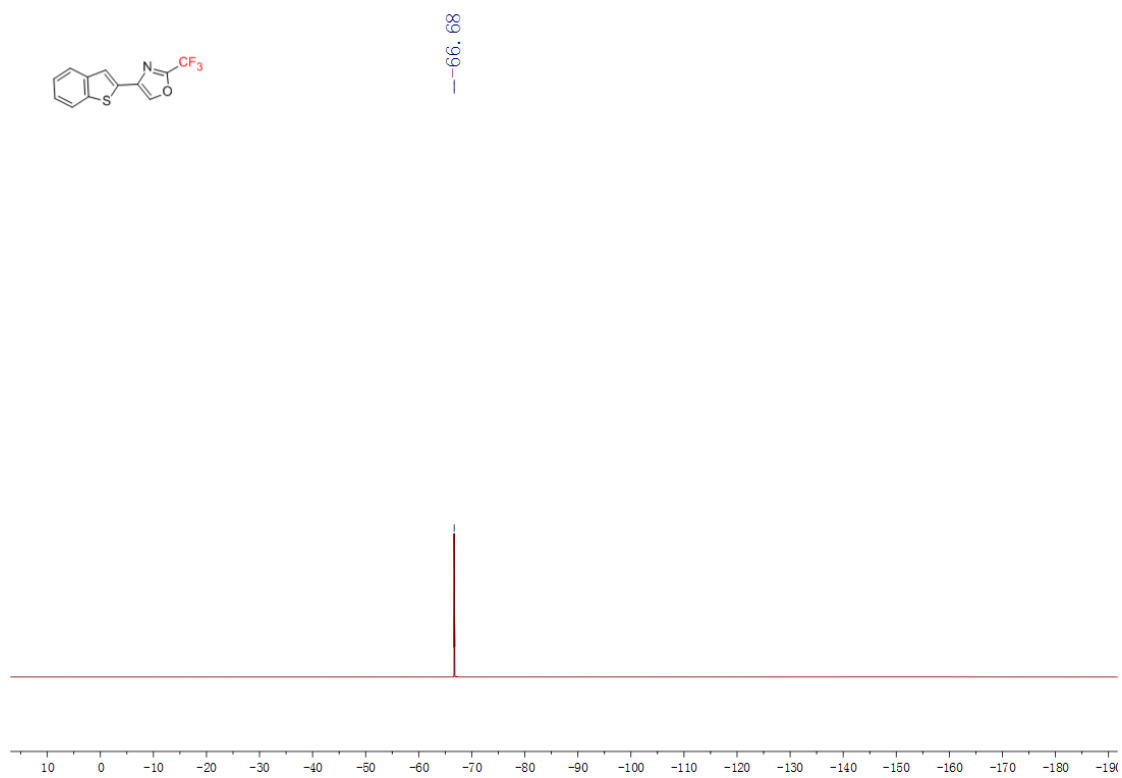

**<sup>1</sup>H NMR spectrum of 3t in acetone-*d*<sub>6</sub>**

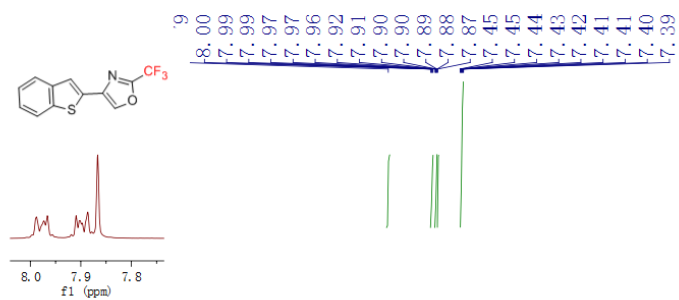

**<sup>13</sup>C NMR spectrum of 3t in acetone-*d*<sub>6</sub>**

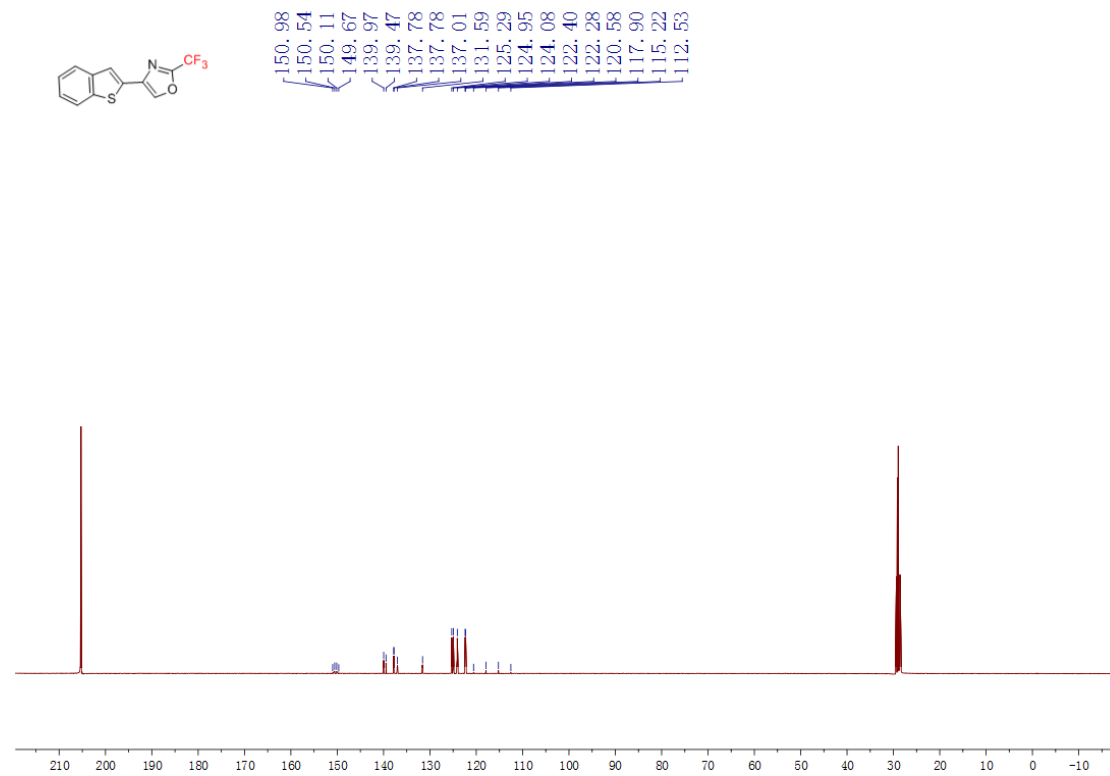

**$^{19}\text{F}$  NMR spectrum of **3u** in  $\text{CDCl}_3$**

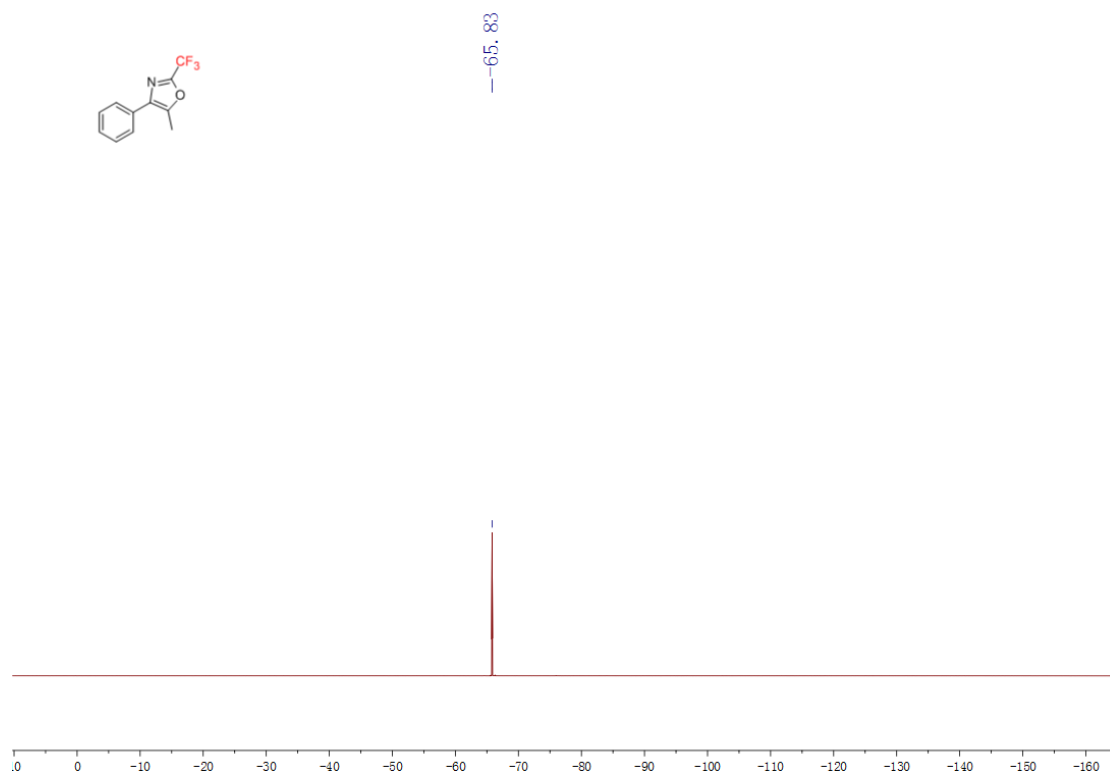

**$^1\text{H}$  NMR spectrum of **3u** in  $\text{CDCl}_3$**

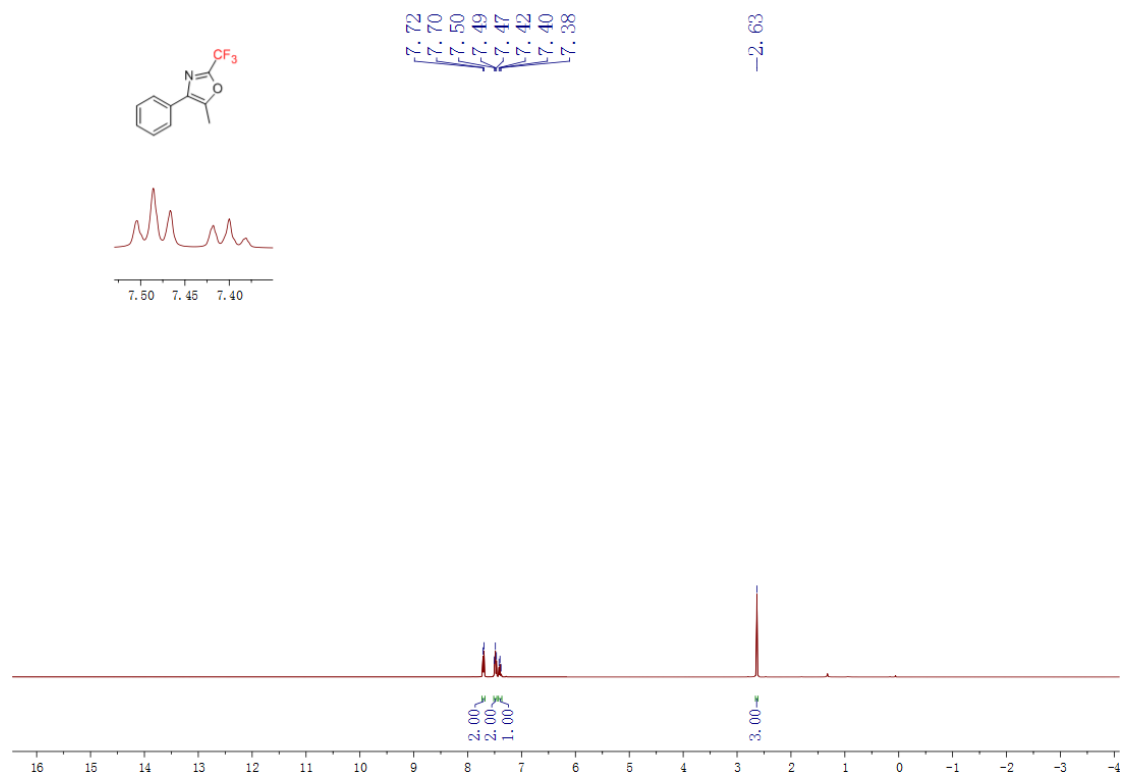

<sup>13</sup>C NMR spectrum of **3u** in CDCl<sub>3</sub>

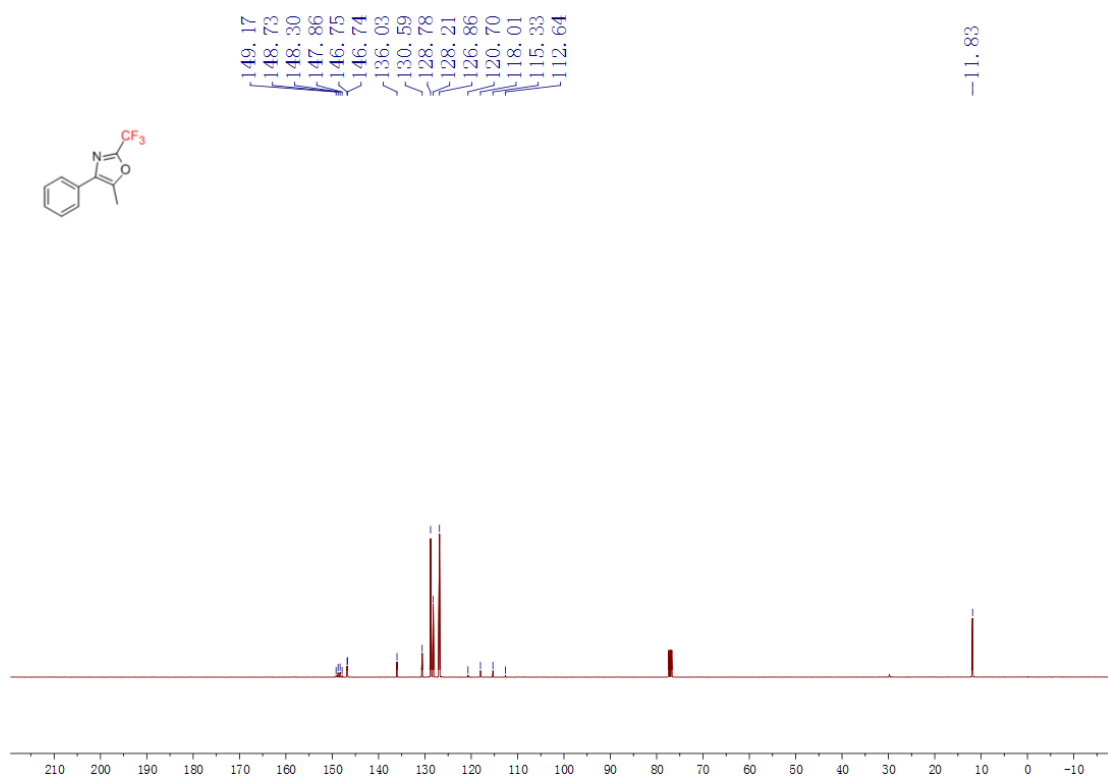

<sup>19</sup>F NMR spectrum of **3v** in CDCl<sub>3</sub>

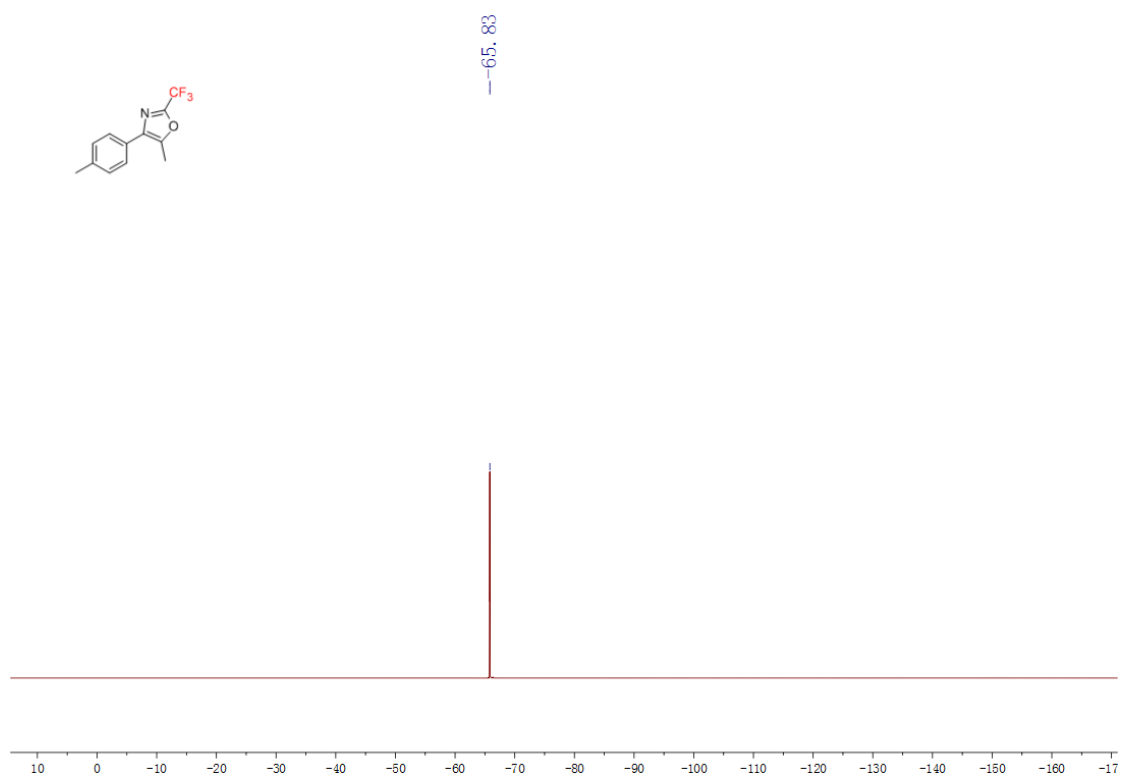

<sup>1</sup>H NMR spectrum of **3v** in CDCl<sub>3</sub>

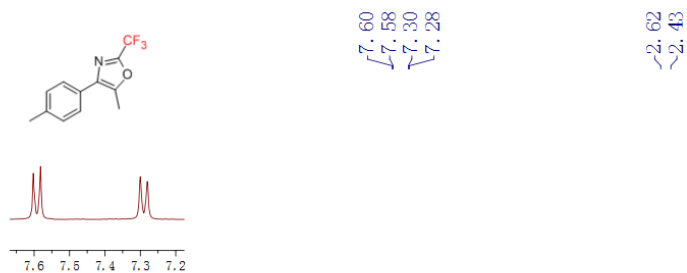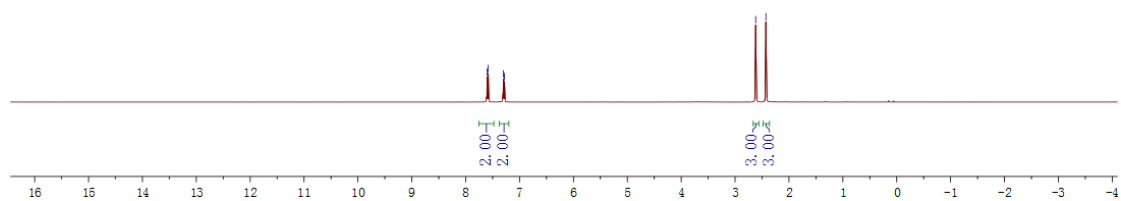

<sup>13</sup>C NMR spectrum of **3v** in CDCl<sub>3</sub>

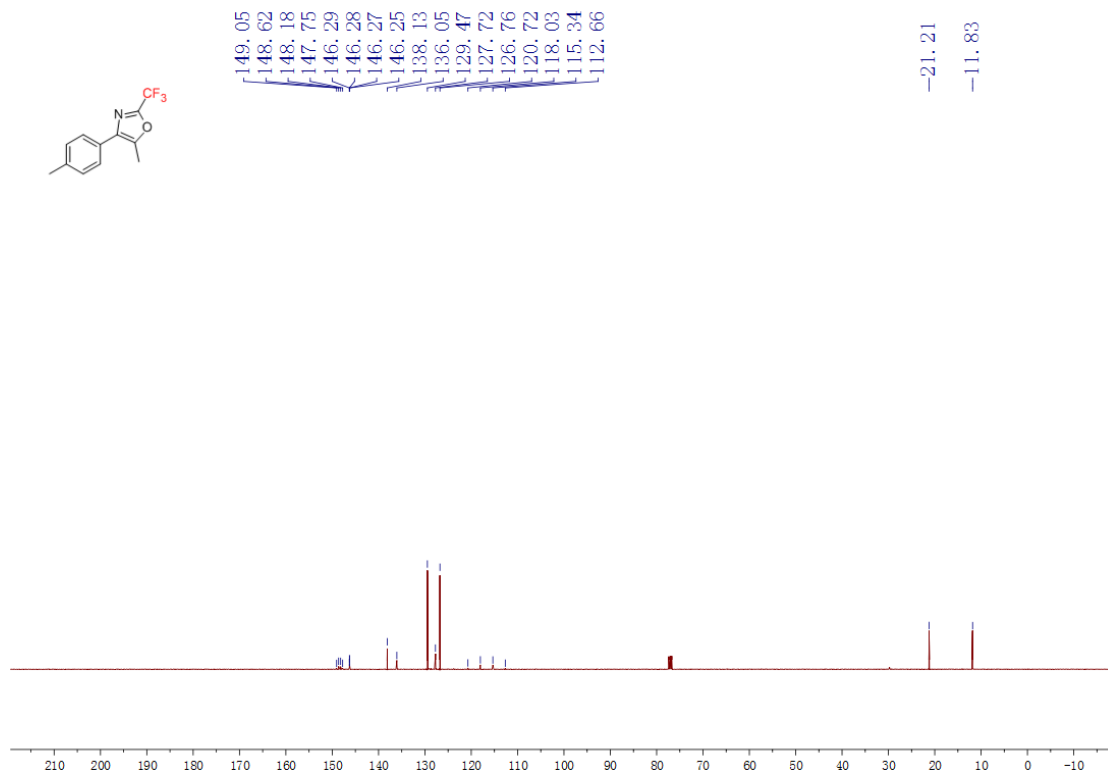



**$^{19}\text{F}$  NMR spectrum of **3w** in  $\text{CDCl}_3$**

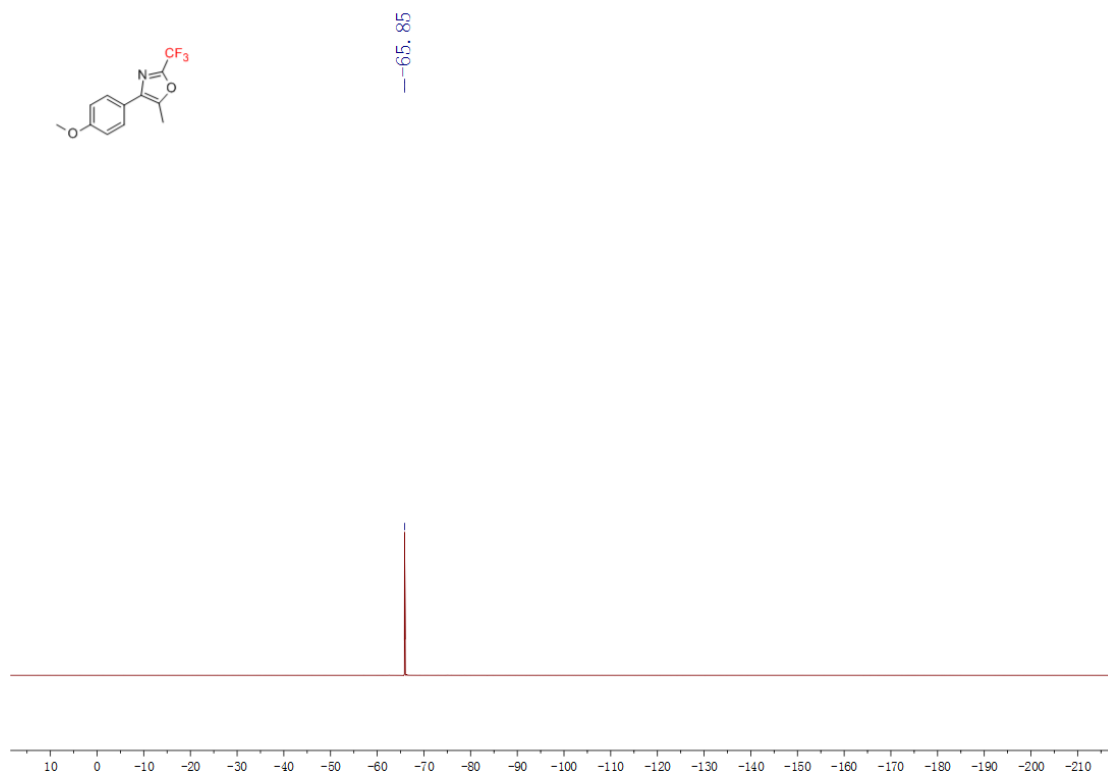

**$^1\text{H}$  NMR spectrum of **3w** in  $\text{CDCl}_3$**

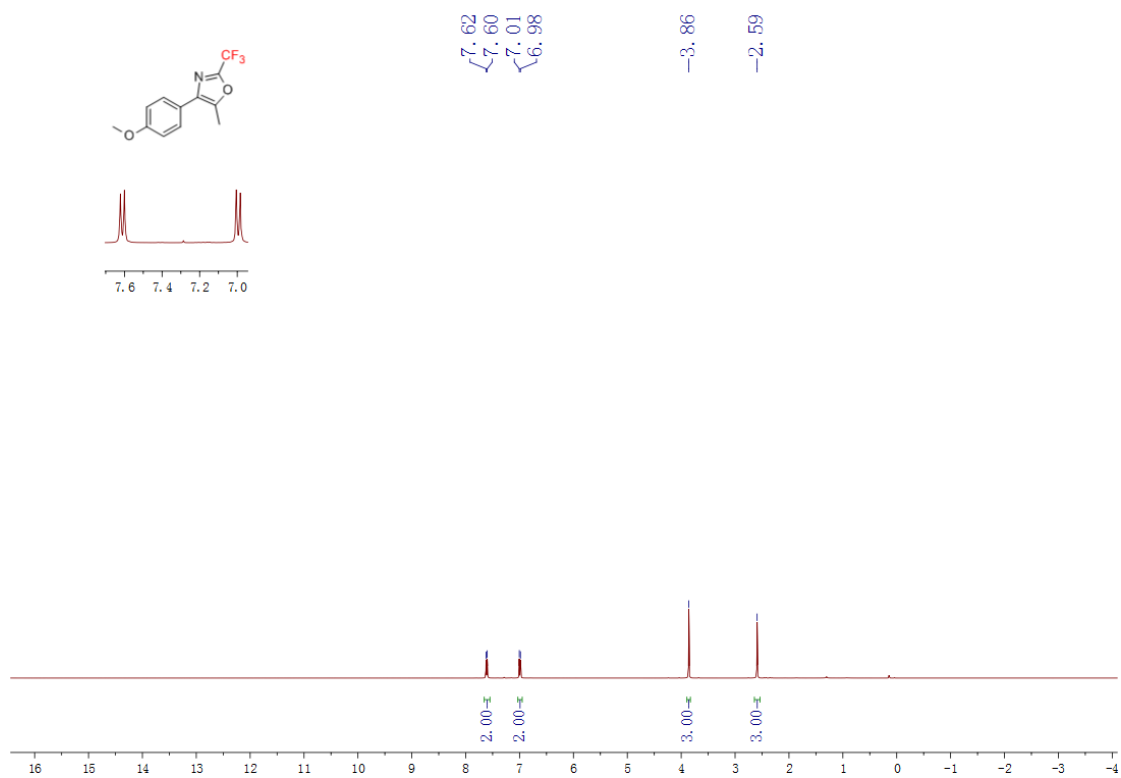

**<sup>13</sup>C NMR spectrum of 3w in CDCl<sub>3</sub>**

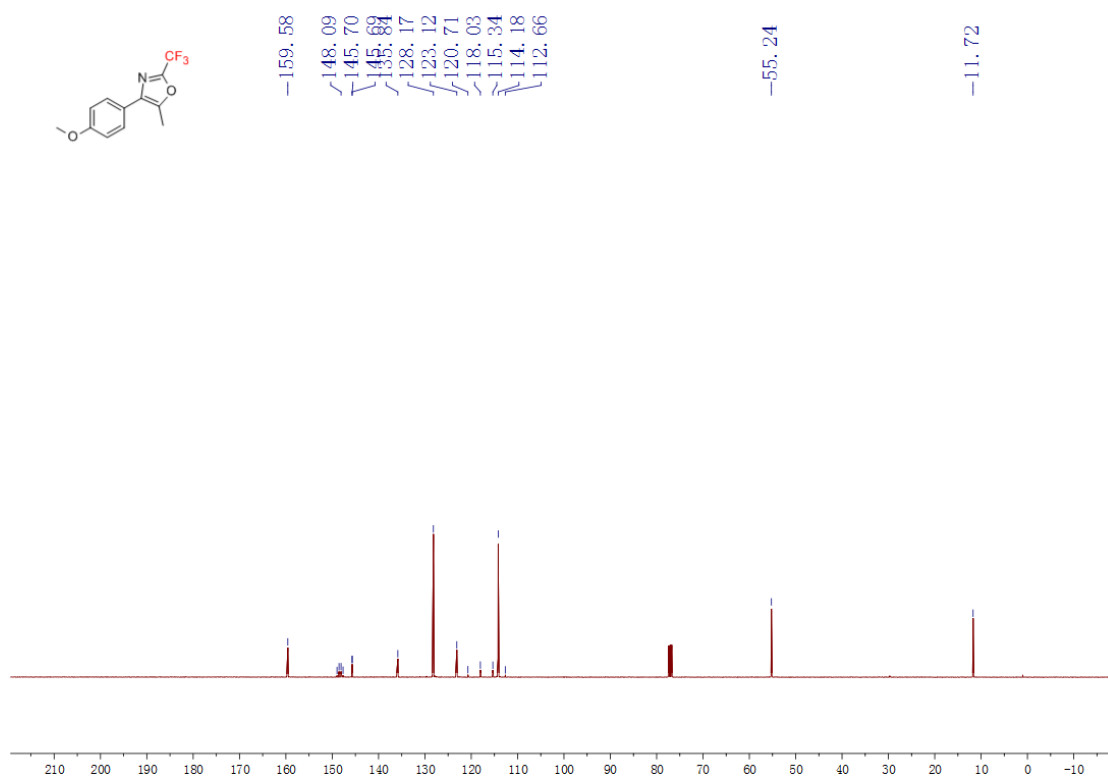

**<sup>19</sup>F NMR spectrum of 3x in CDCl<sub>3</sub>**

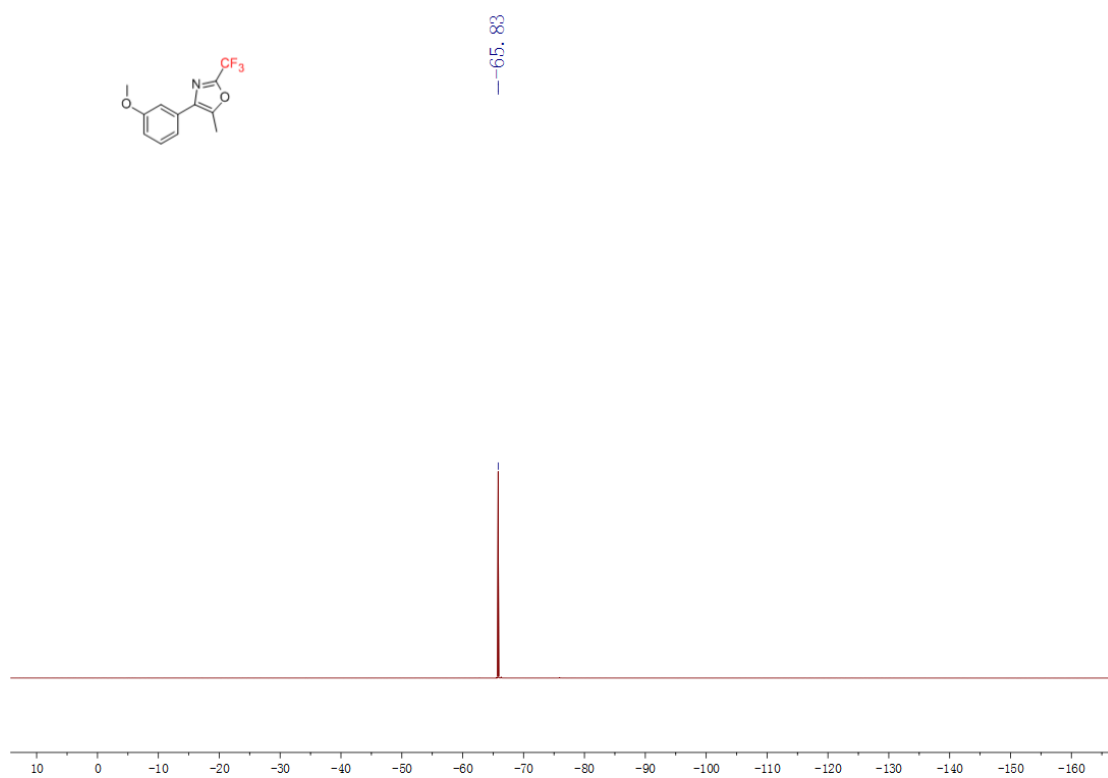

**<sup>1</sup>H NMR spectrum of 3x in CDCl<sub>3</sub>**

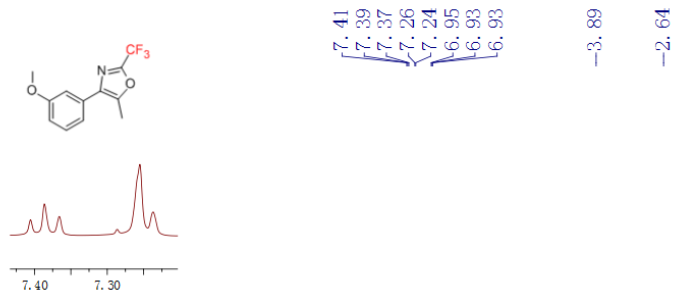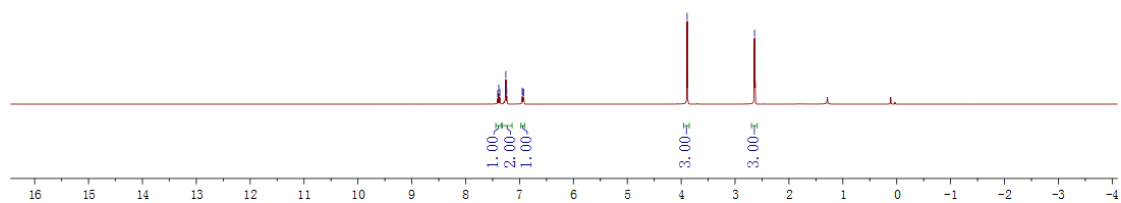

**<sup>13</sup>C NMR spectrum of 3x in CDCl<sub>3</sub>**

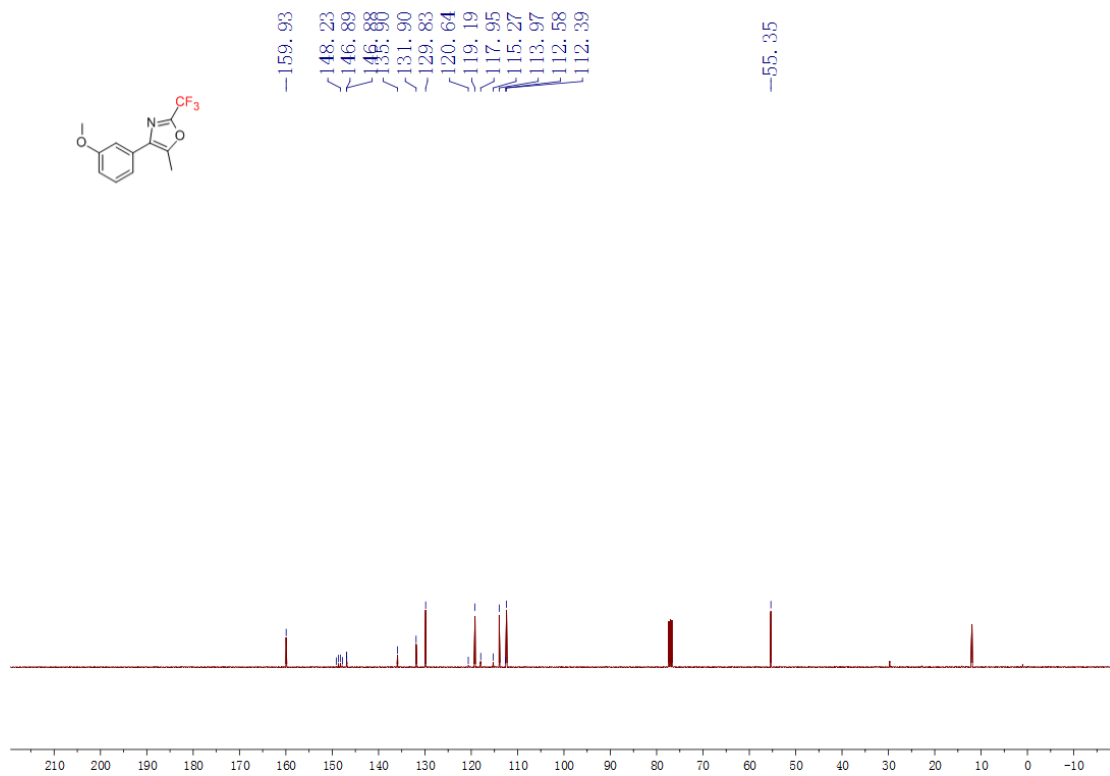

**$^{19}\text{F}$  NMR spectrum of **3y** in  $\text{CDCl}_3$**

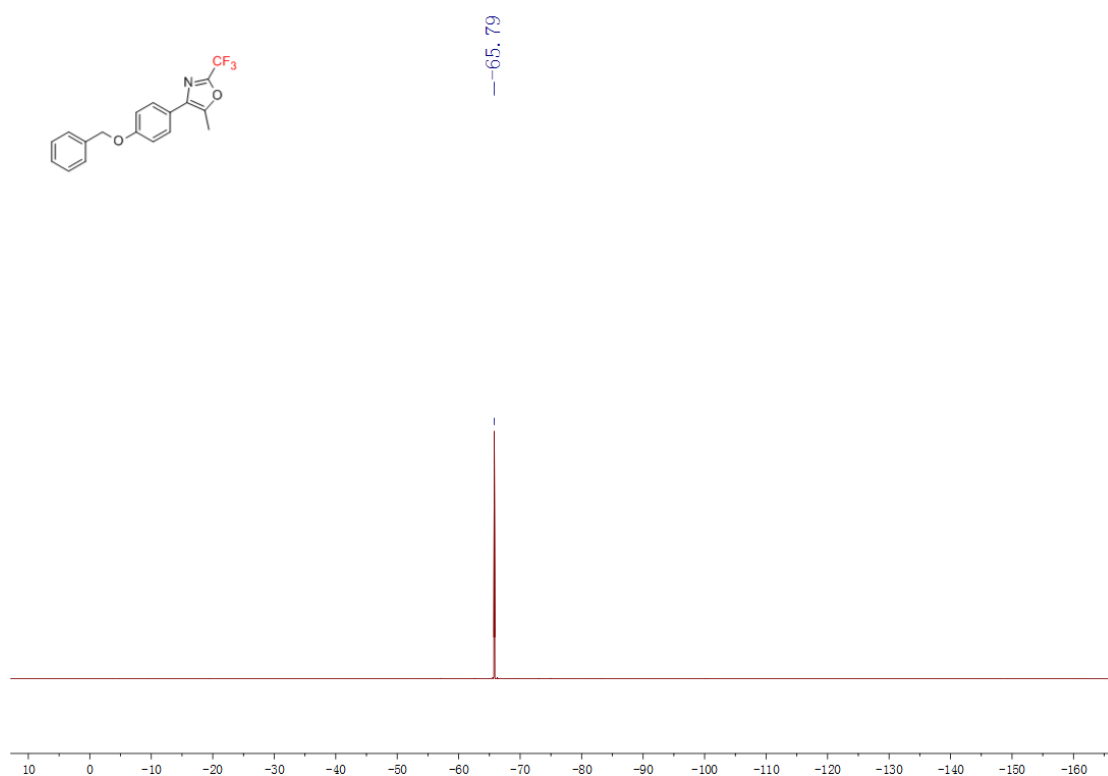

**$^1\text{H}$  NMR spectrum of **3y** in  $\text{CDCl}_3$**

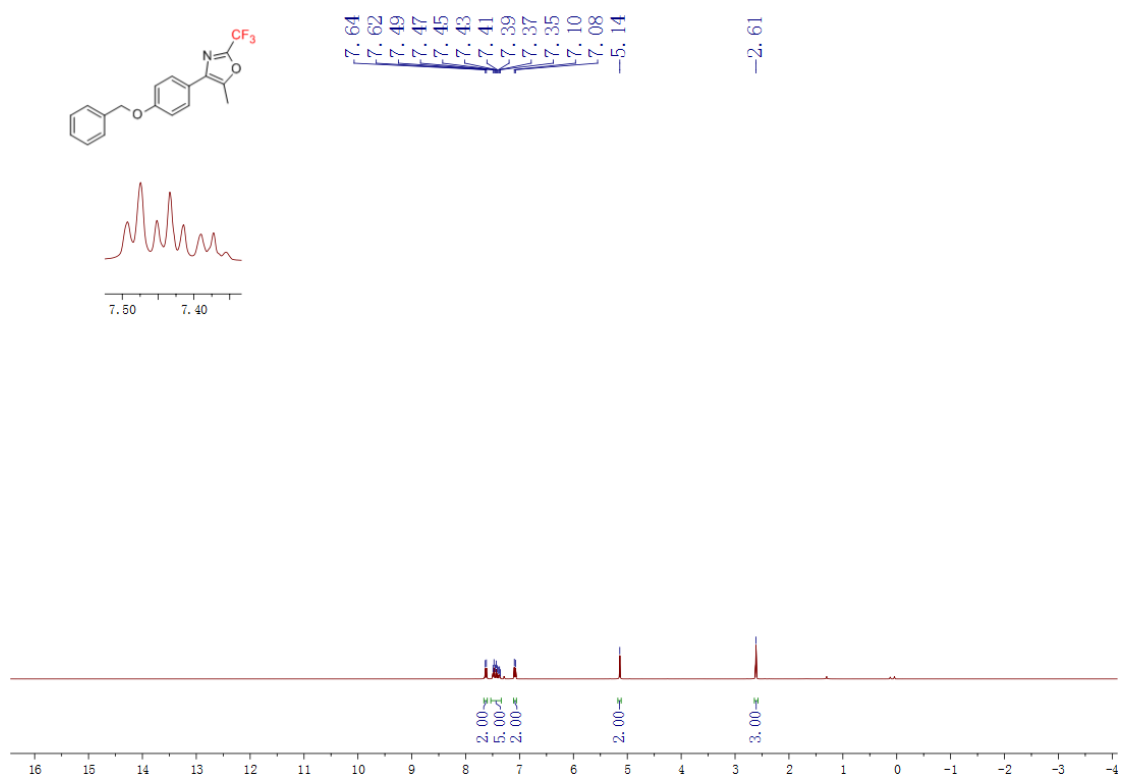

**<sup>13</sup>C NMR spectrum of 3y in CDCl<sub>3</sub>**

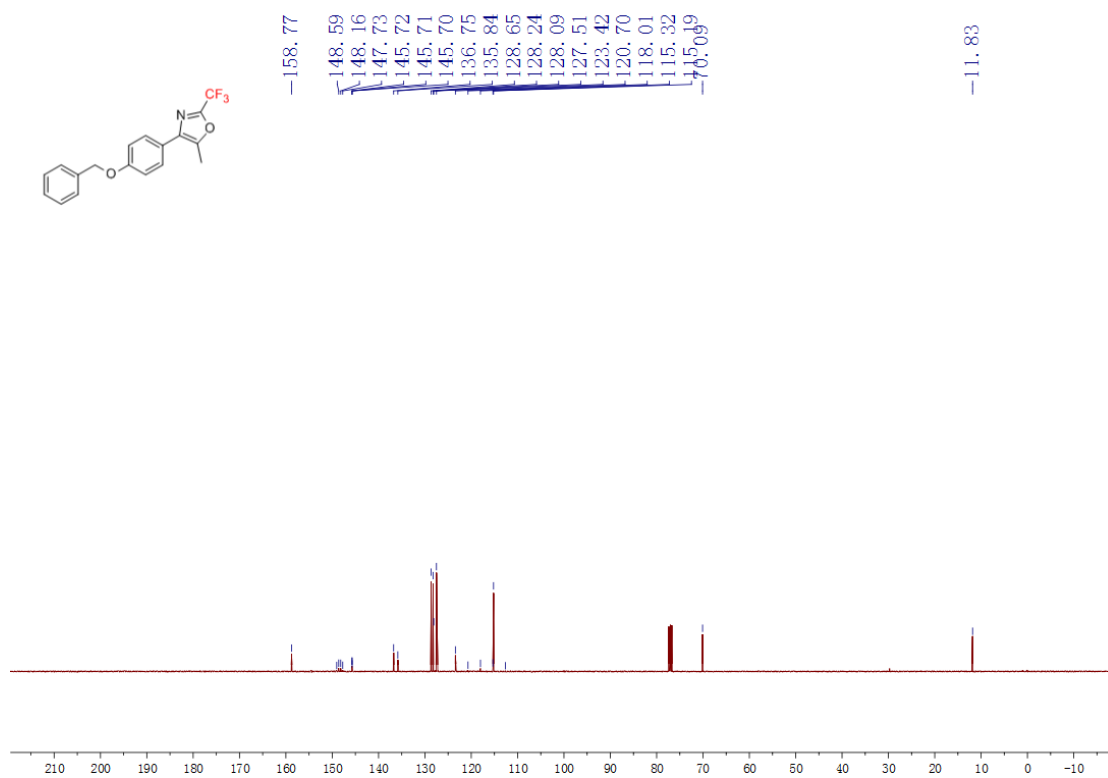

**<sup>19</sup>F NMR spectrum of 3z in CDCl<sub>3</sub>**

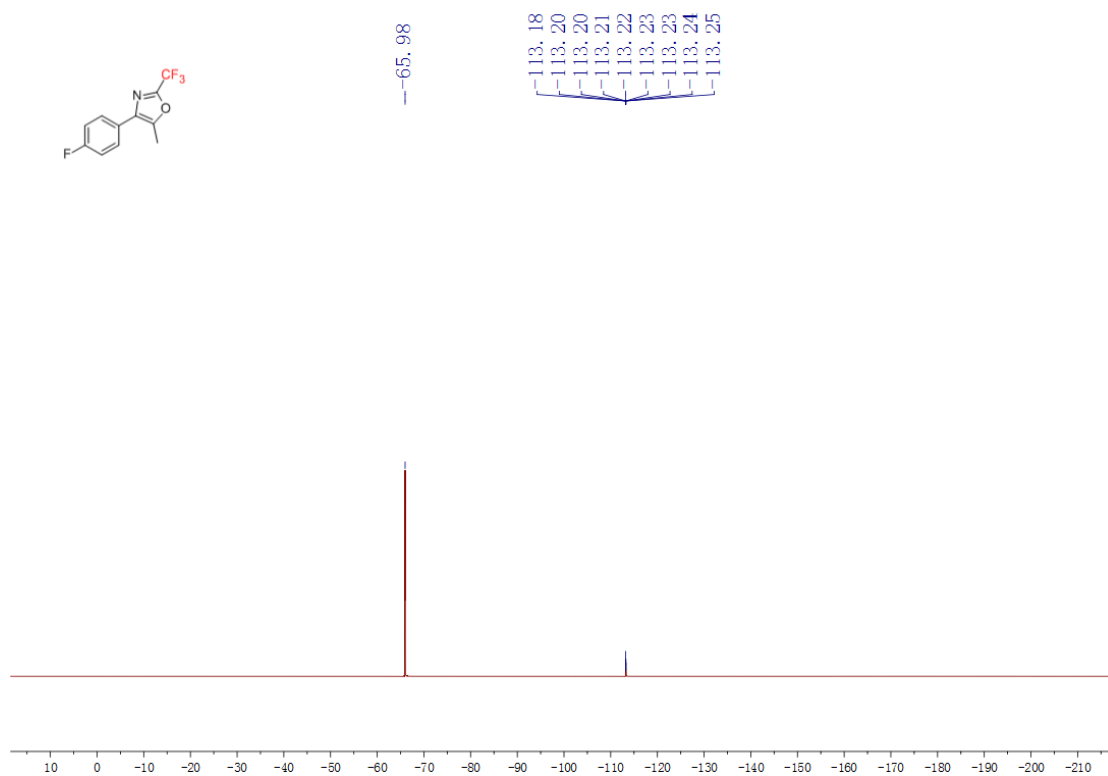

$^1\text{H}$  NMR spectrum of **3z** in  $\text{CDCl}_3$

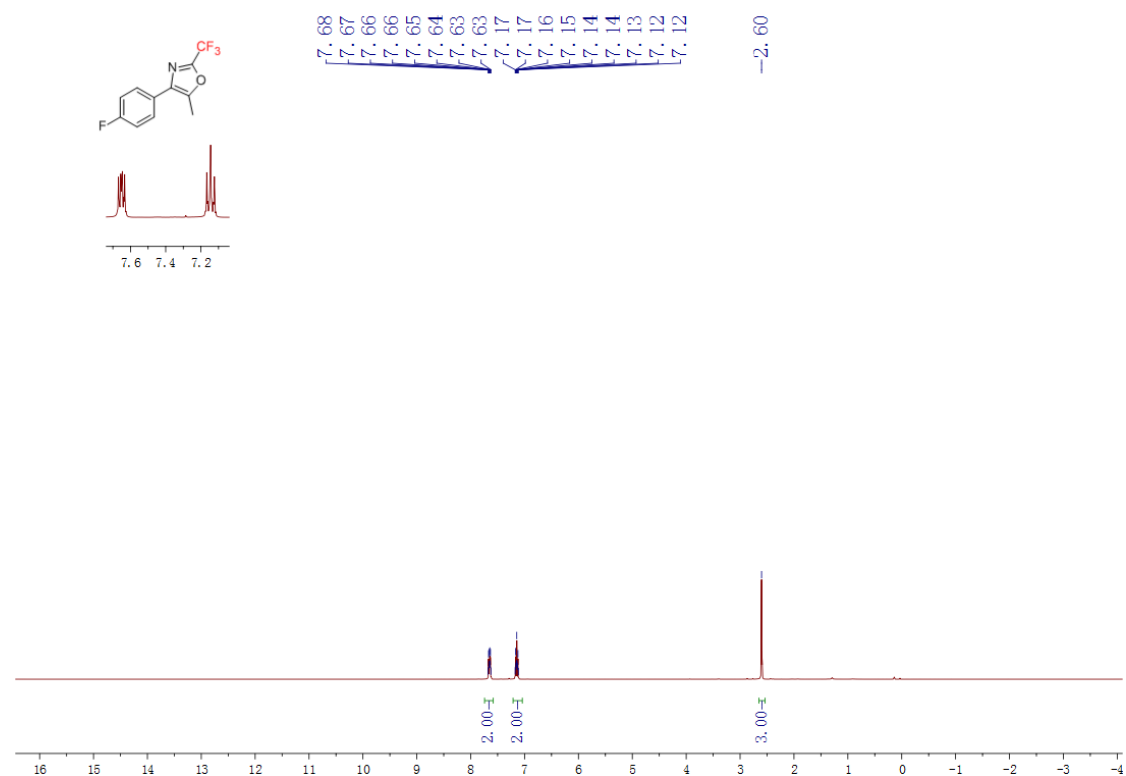

$^{13}\text{C}$  NMR spectrum of **3z** in  $\text{CDCl}_3$

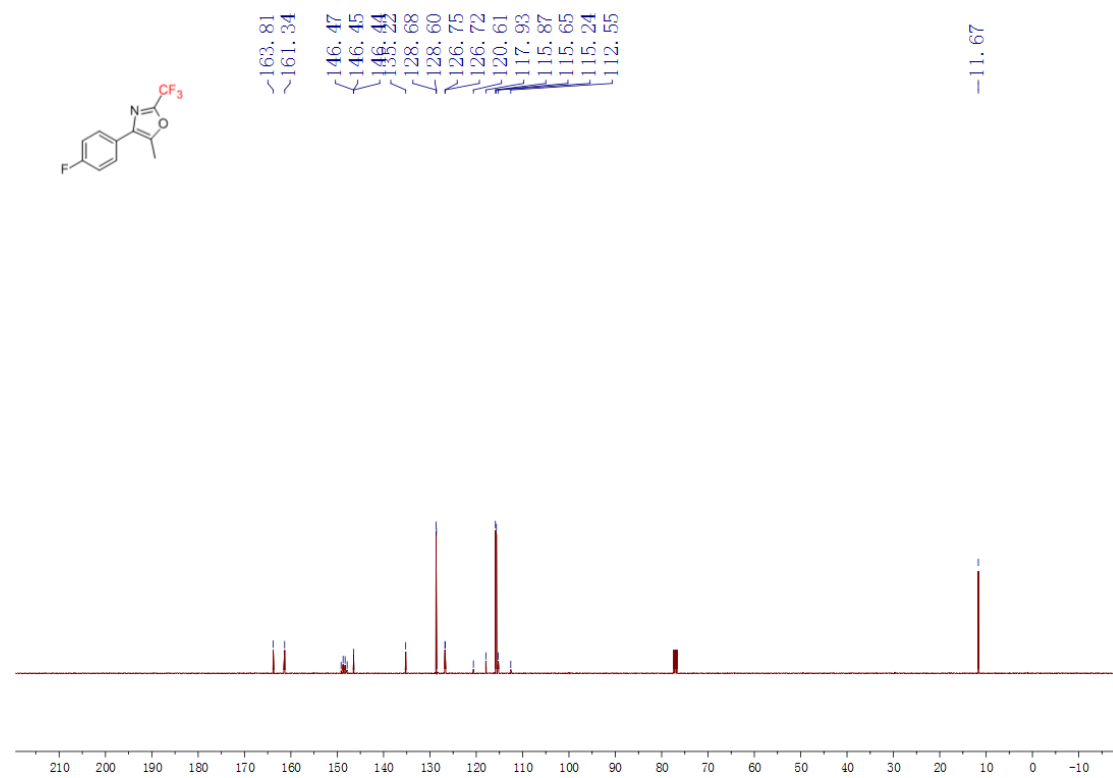

**$^{19}\text{F}$  NMR spectrum of **3aa** in  $\text{CDCl}_3$**

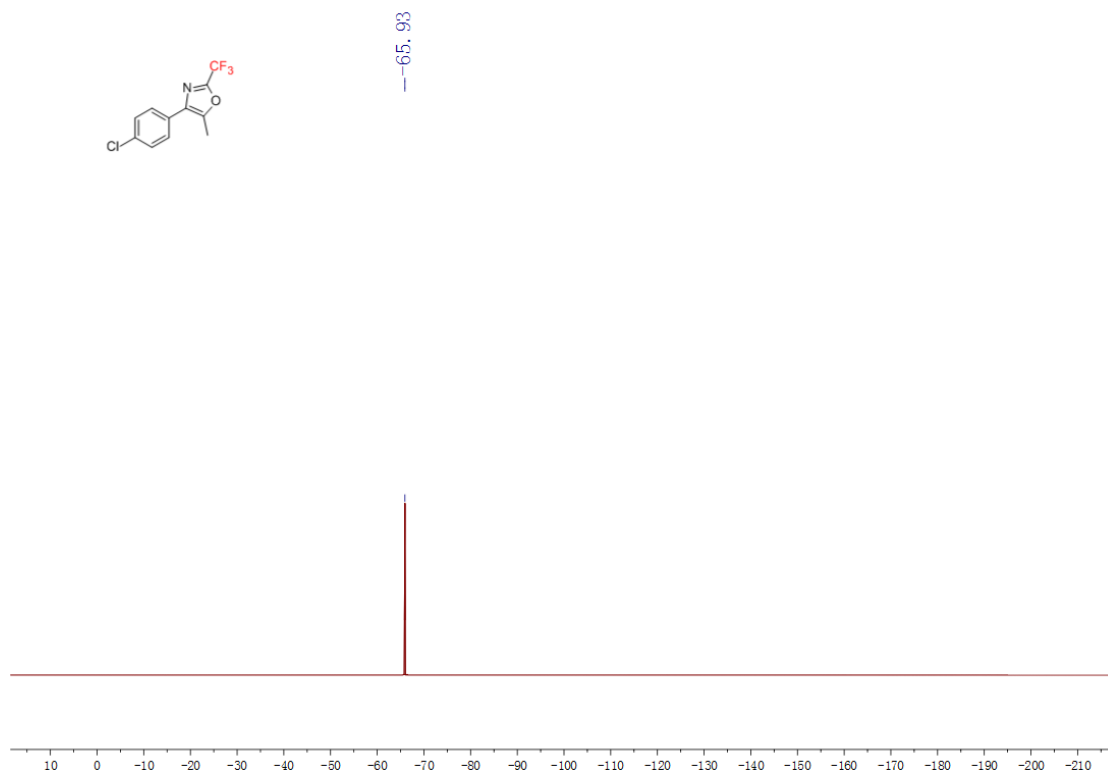

**$^1\text{H}$  NMR spectrum of **3aa** in  $\text{CDCl}_3$**

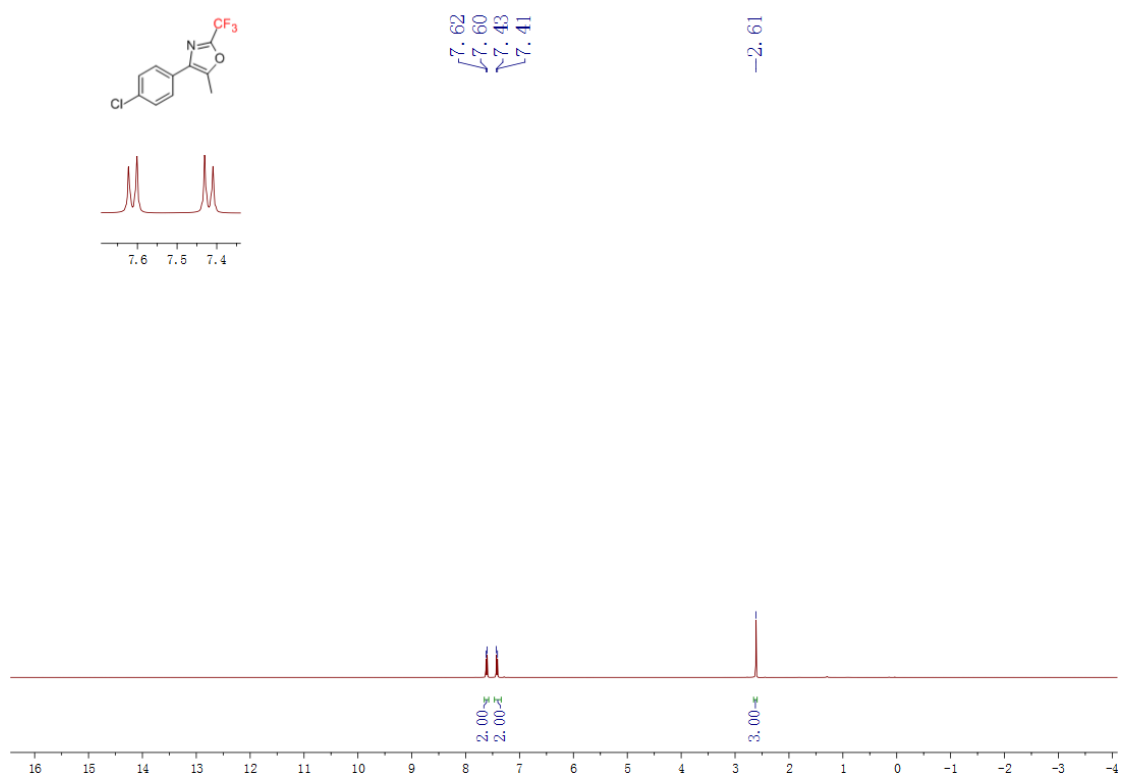

**<sup>13</sup>C NMR spectrum of 3aa in CDCl<sub>3</sub>**

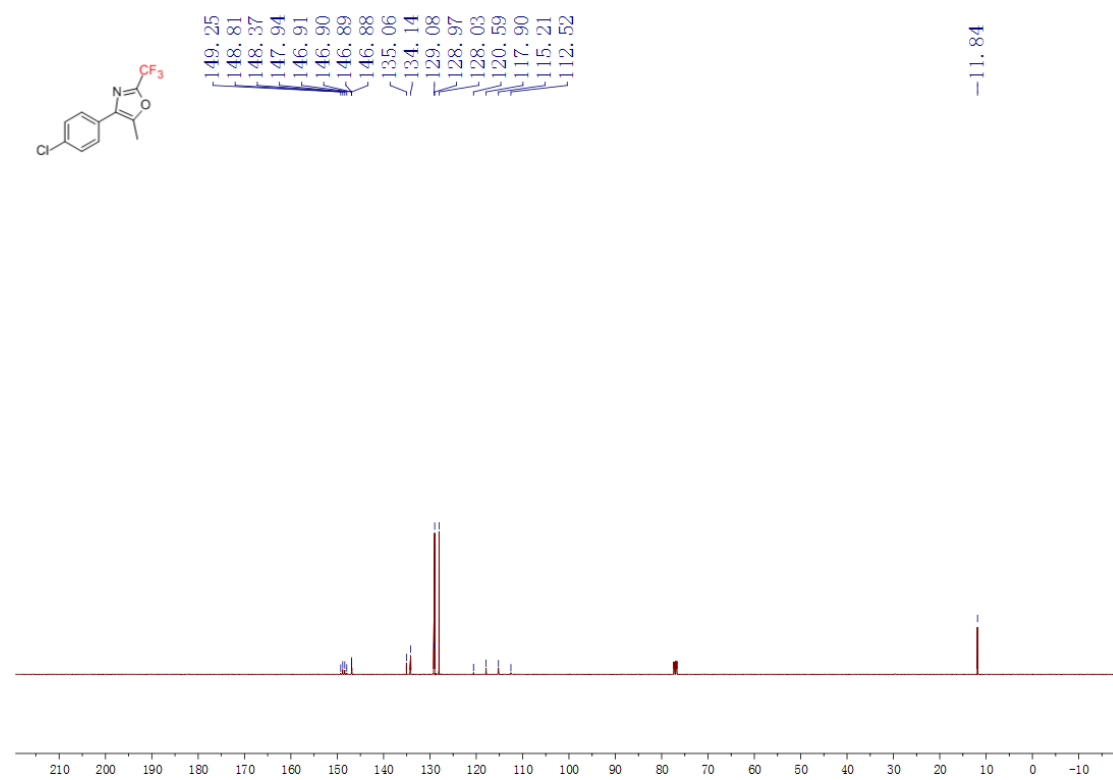

**<sup>19</sup>F NMR spectrum of 3ab in CDCl<sub>3</sub>**

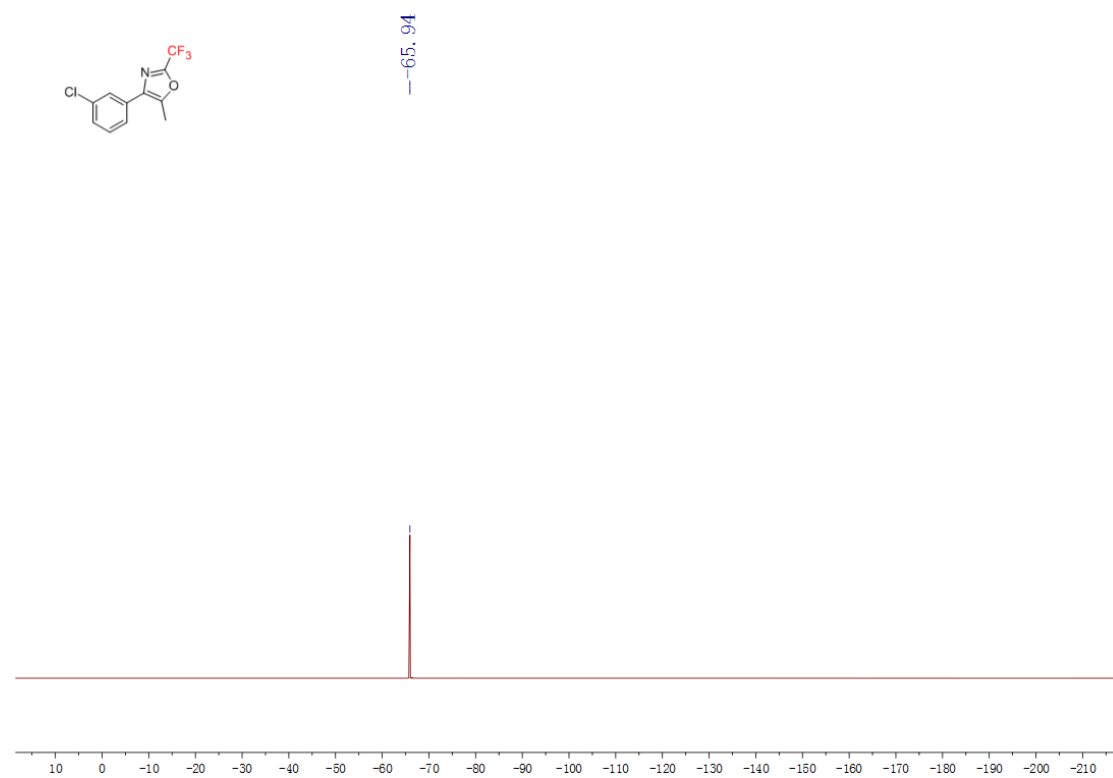



**<sup>1</sup>H NMR spectrum of 3ab in CDCl<sub>3</sub>**

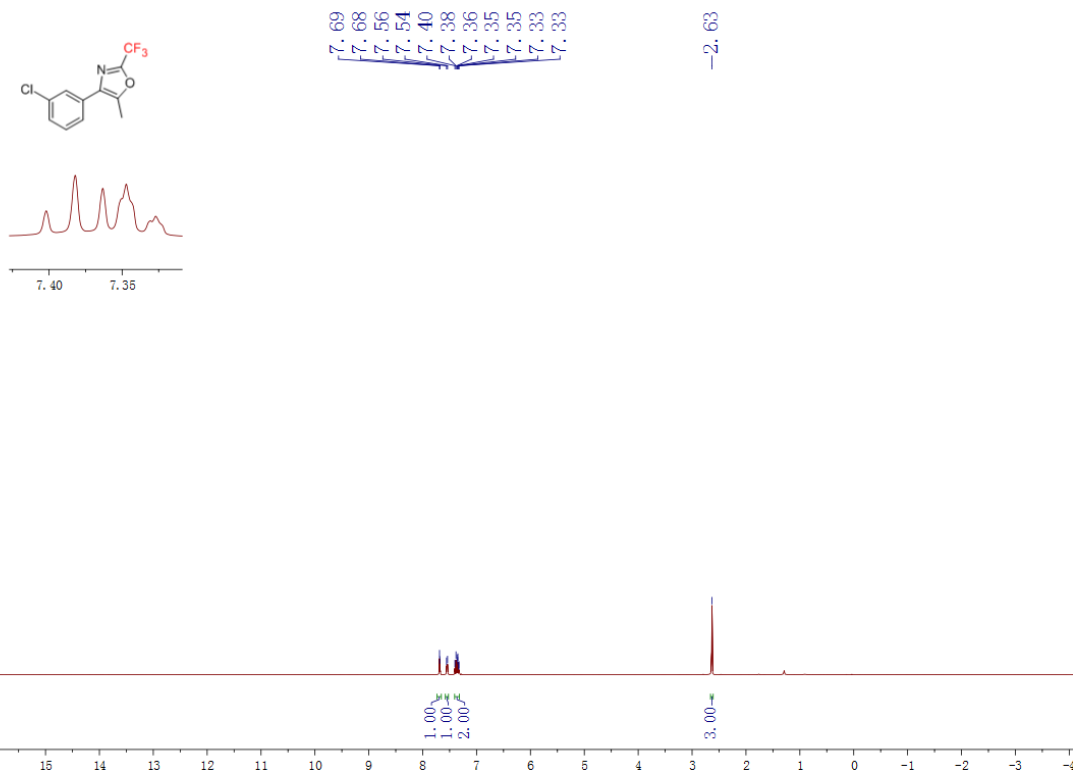

**<sup>13</sup>C NMR spectrum of 3ab in CDCl<sub>3</sub>**

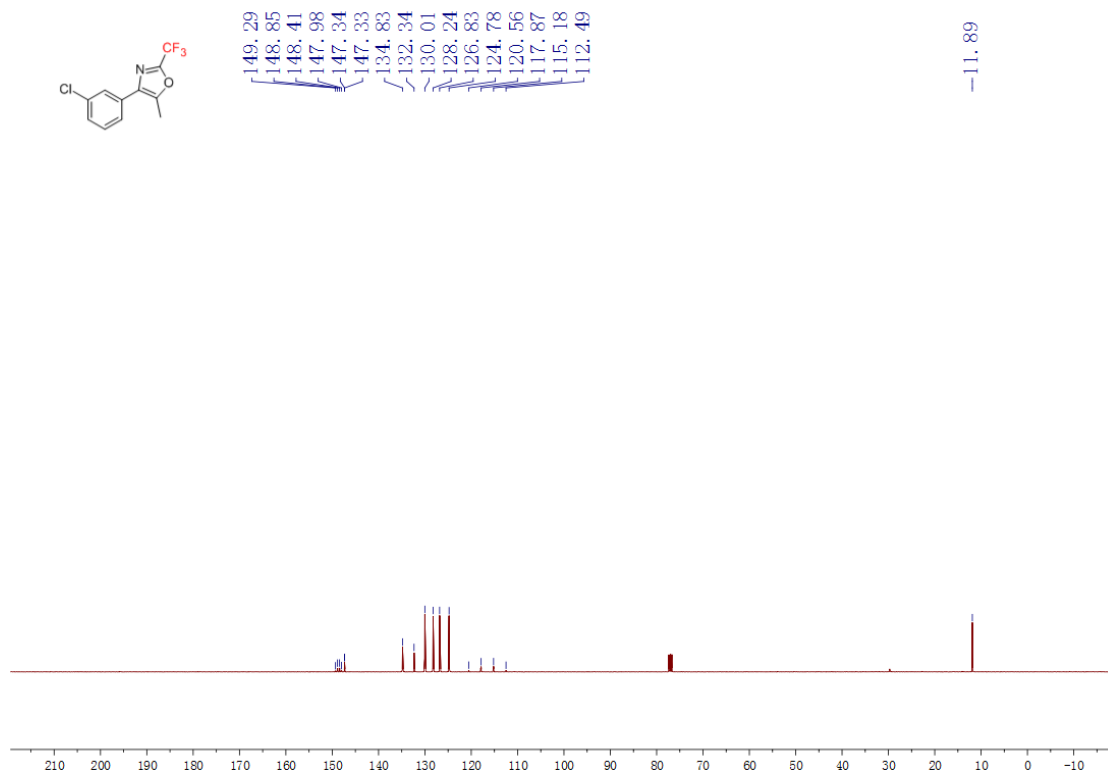

$^{19}\text{F}$  NMR spectrum of **3ac** in  $\text{CDCl}_3$

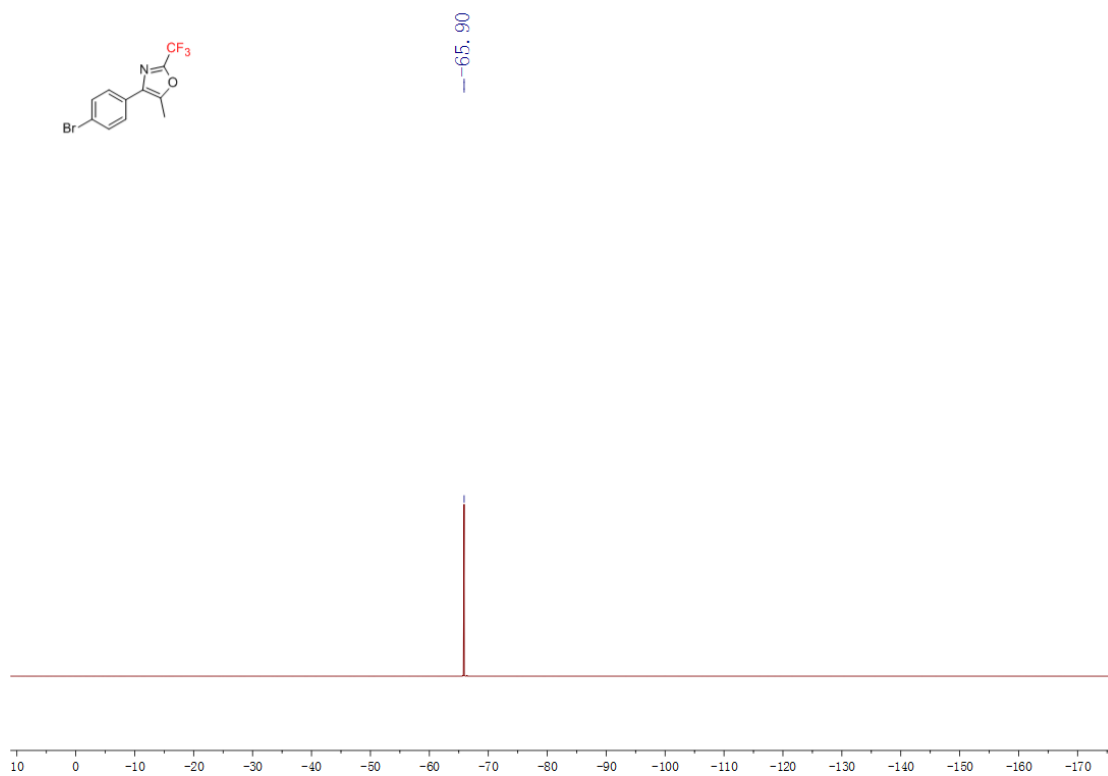

$^1\text{H}$  NMR spectrum of **3ac** in  $\text{CDCl}_3$

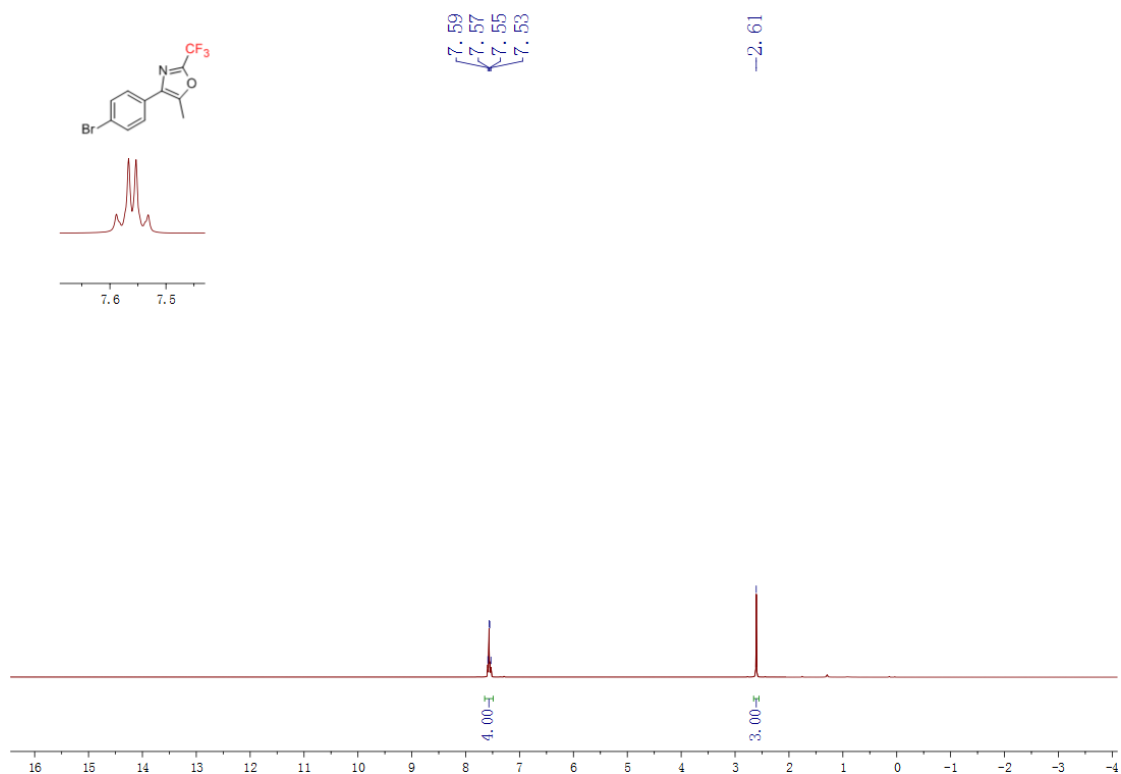

<sup>13</sup>C NMR spectrum of **3ac** in CDCl<sub>3</sub>

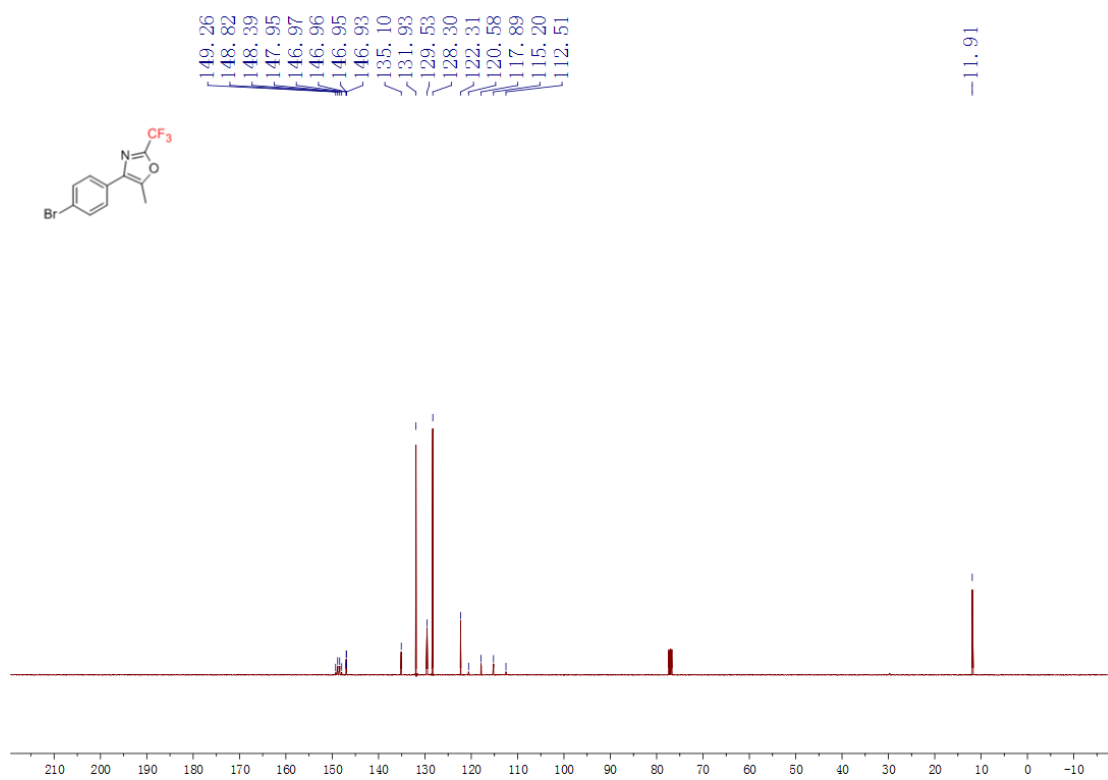

<sup>19</sup>F NMR spectrum of compound **3ad** in CDCl<sub>3</sub>

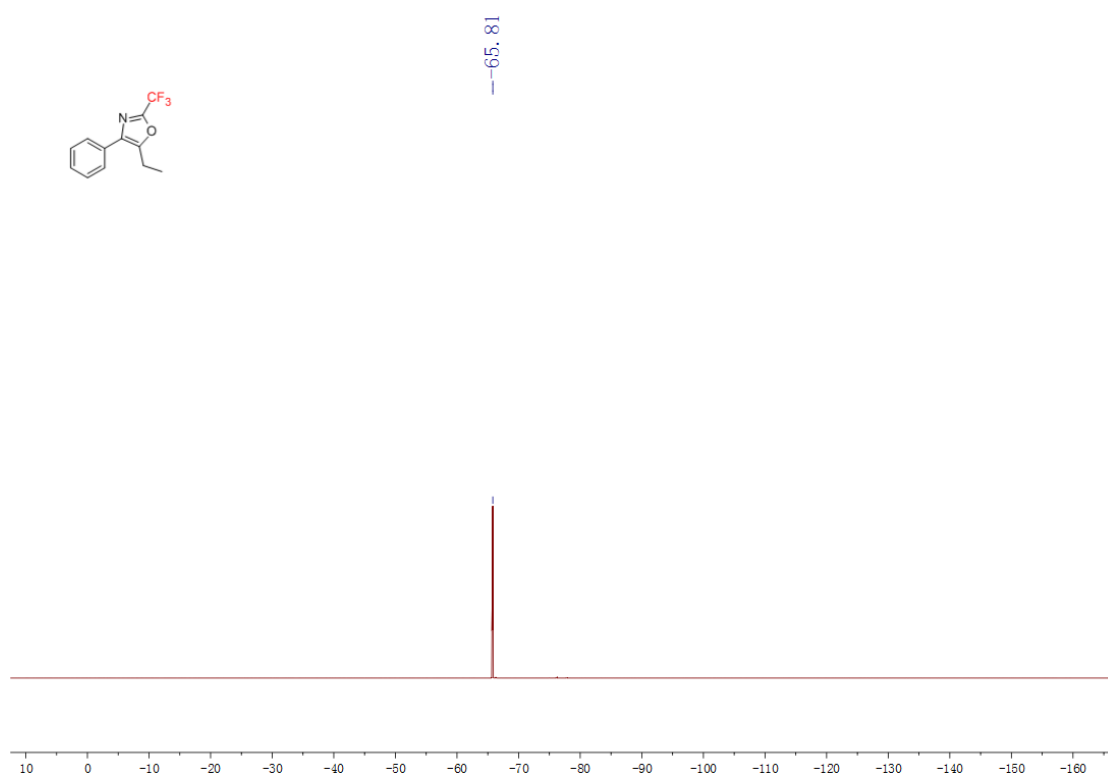

**<sup>1</sup>H NMR spectrum of compound 3ad in CDCl<sub>3</sub>**

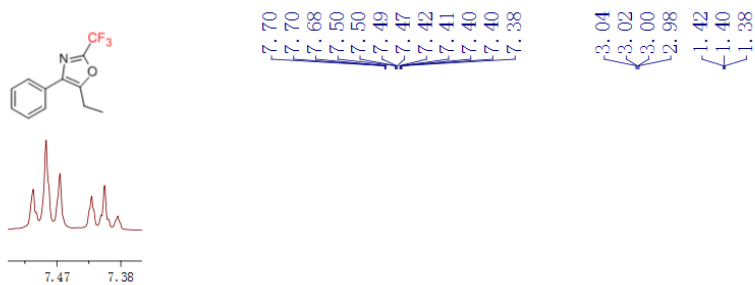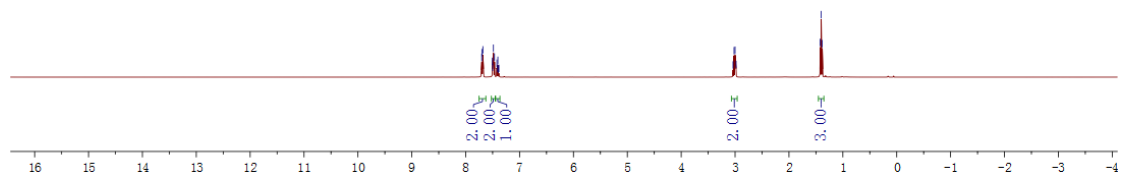

**<sup>13</sup>C NMR spectrum of compound 3ad in CDCl<sub>3</sub>**

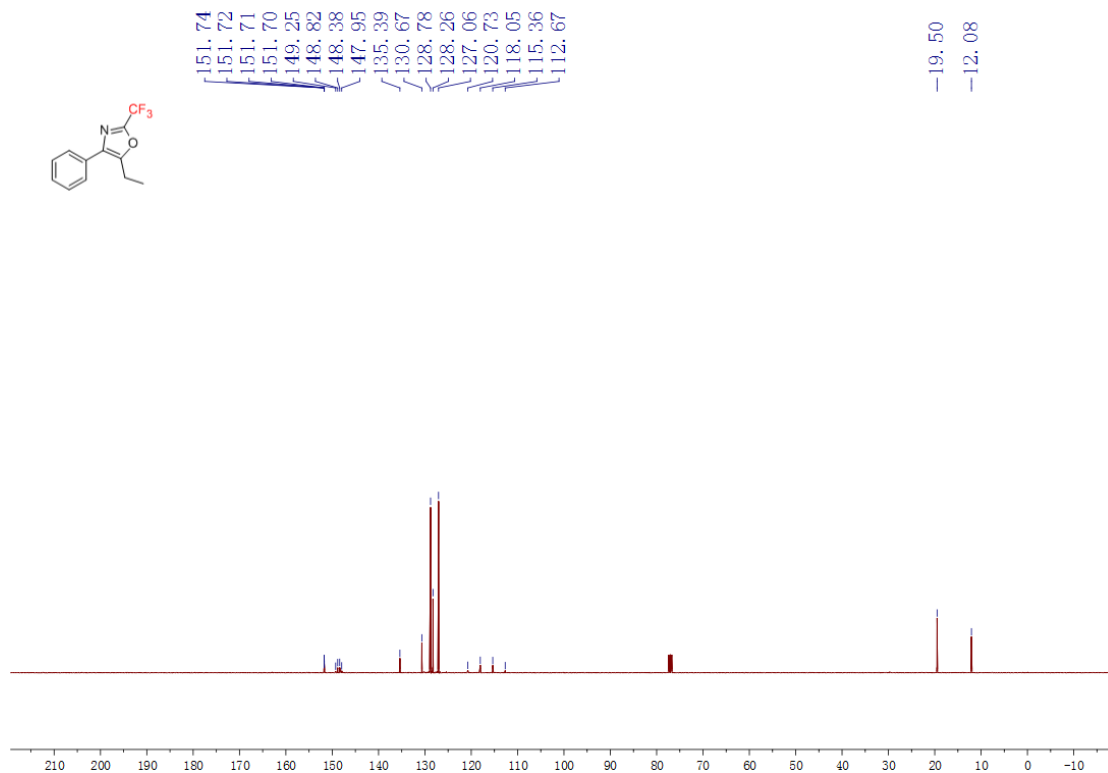

**<sup>19</sup>F NMR spectrum of compound 3ae in CDCl<sub>3</sub>**

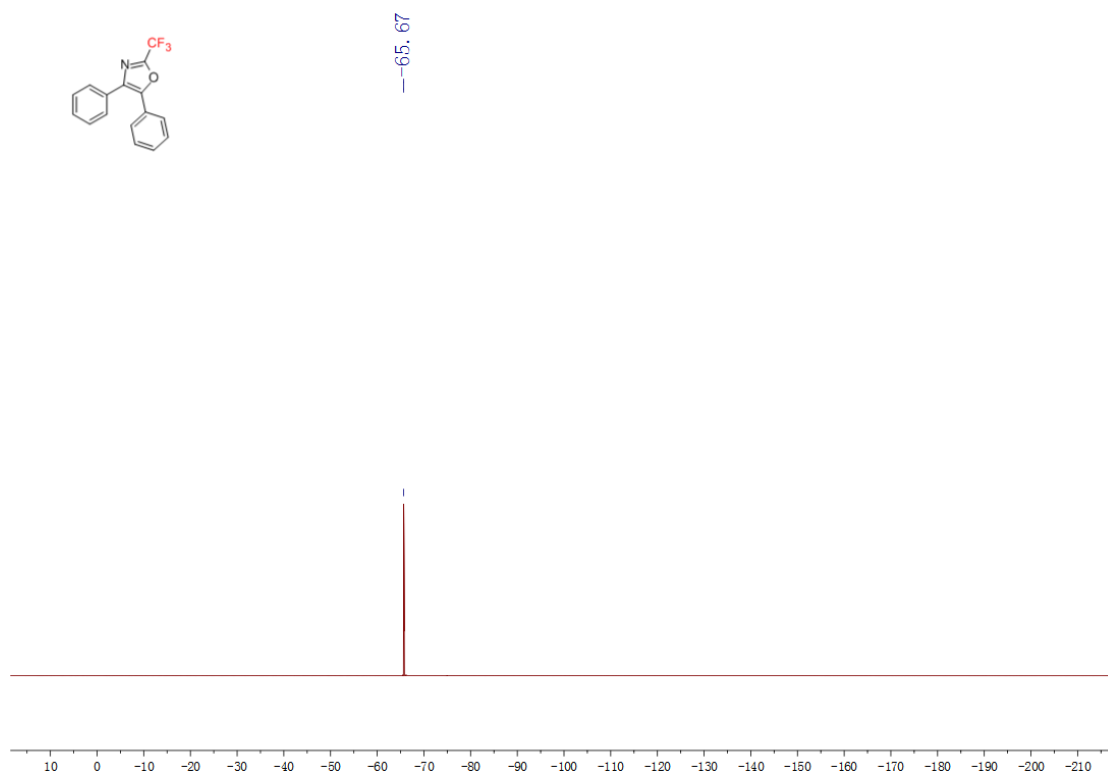

**<sup>1</sup>H NMR spectrum of compound 3ae in CDCl<sub>3</sub>**

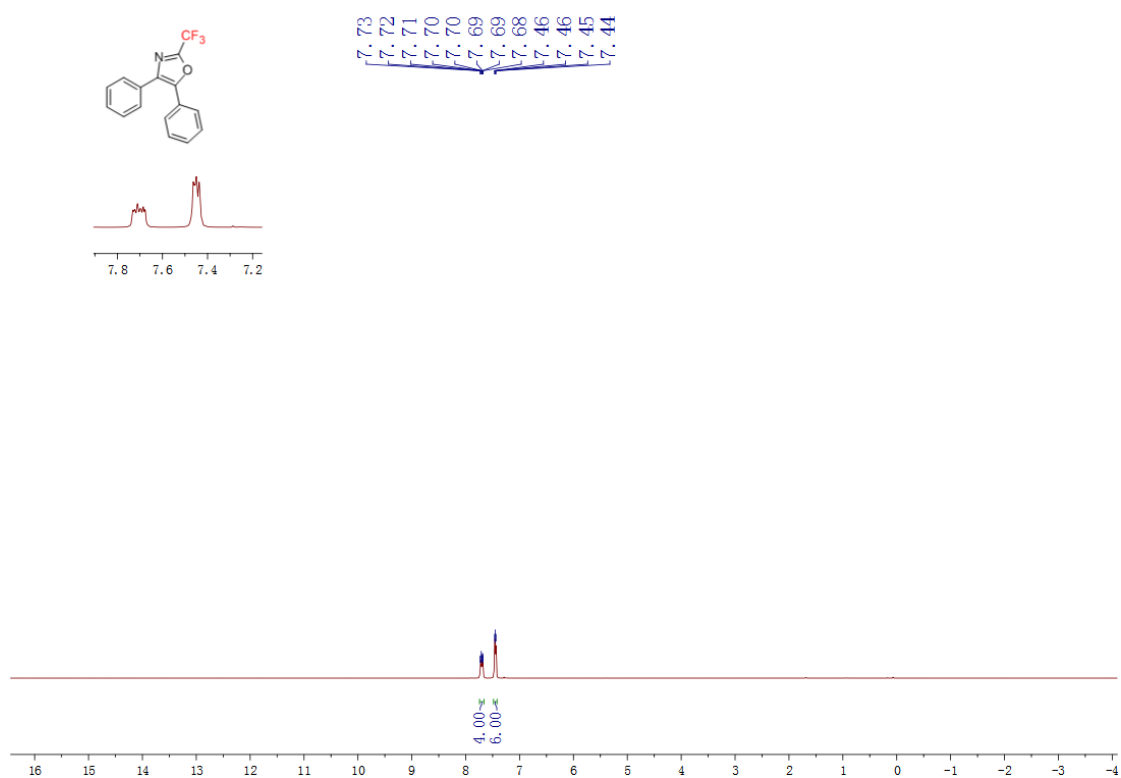

**<sup>13</sup>C NMR spectrum of compound 3ae in CDCl<sub>3</sub>**

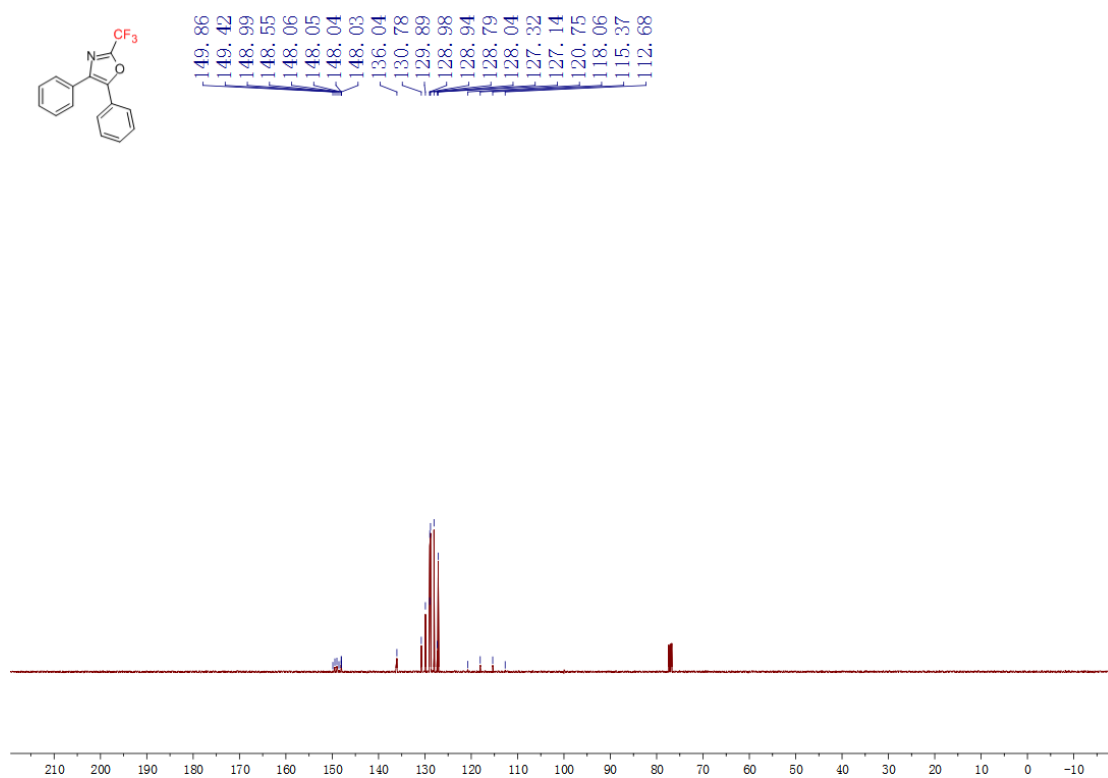

**<sup>19</sup>F NMR spectrum of compound 3af in CDCl<sub>3</sub>**

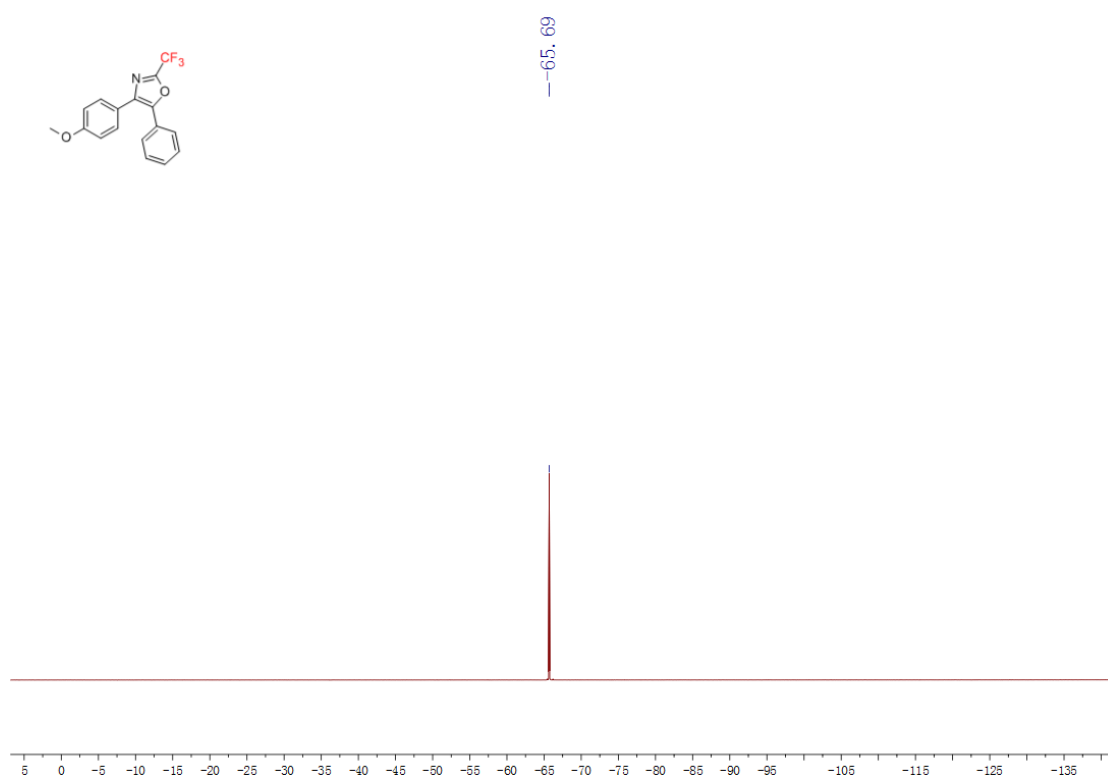

$^1\text{H}$  NMR spectrum of compound **3af** in  $\text{CDCl}_3$

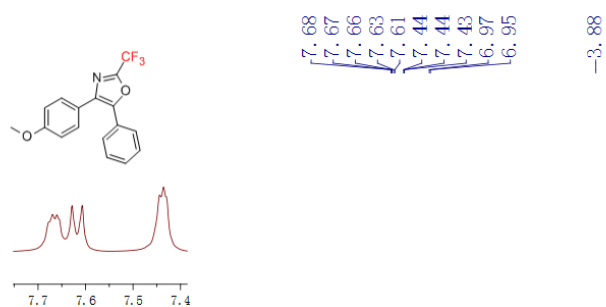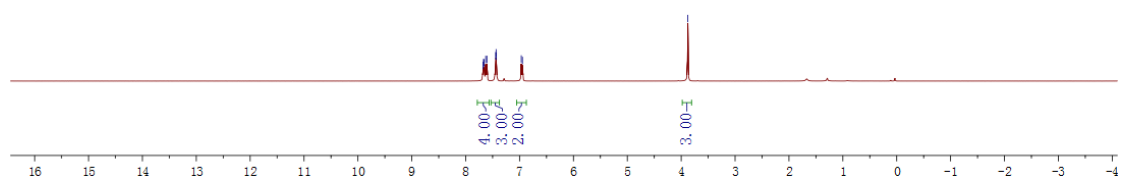

$^{13}\text{C}$  NMR spectrum of compound **3af** in  $\text{CDCl}_3$

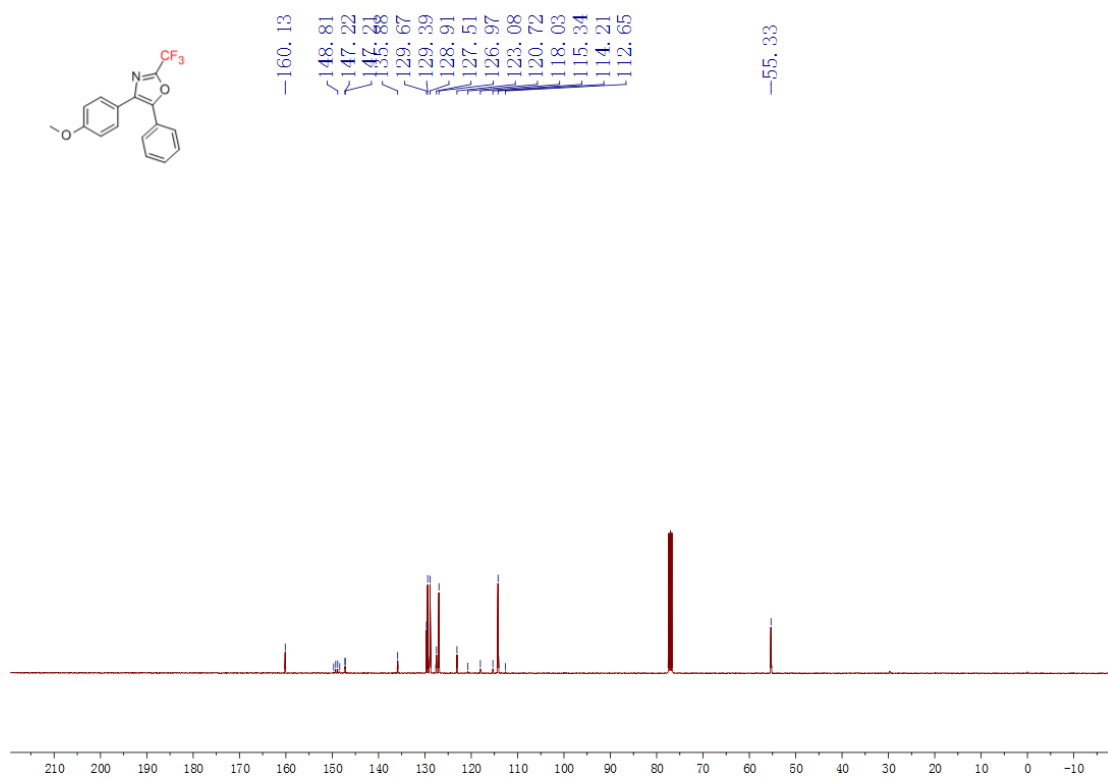

**$^{19}\text{F}$  NMR spectrum of **3ag** in  $\text{CDCl}_3$**

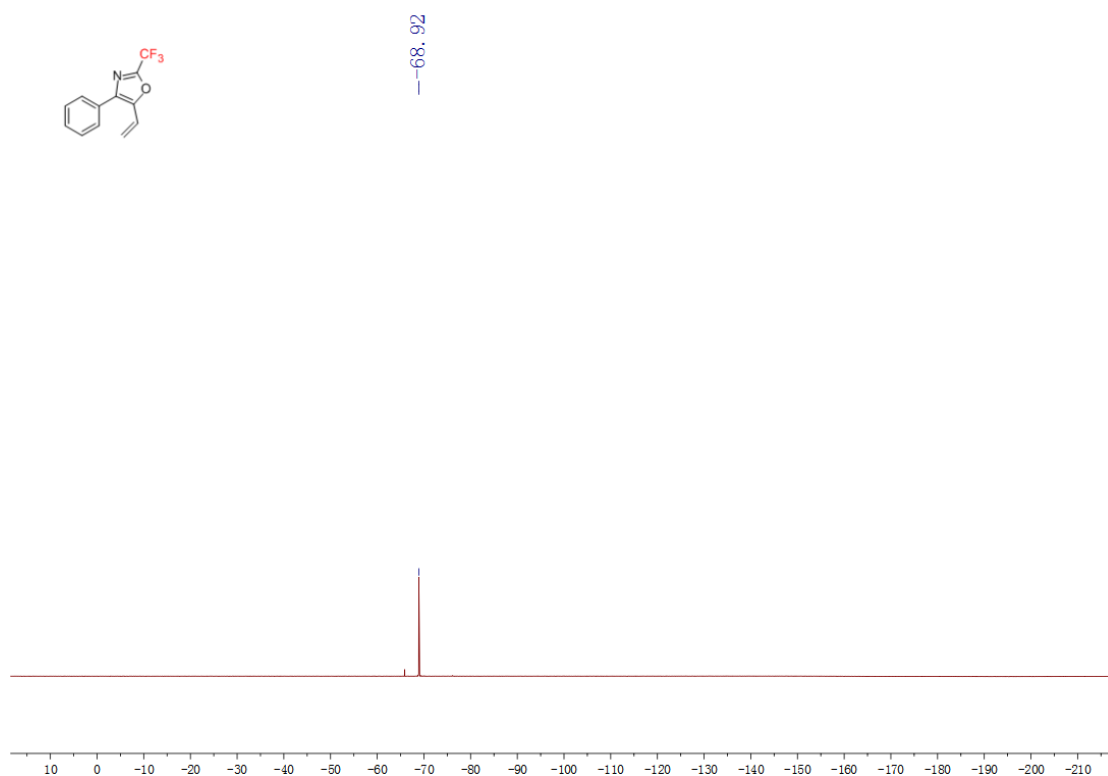

**$^1\text{H}$  NMR spectrum of **3ag** in  $\text{CDCl}_3$**

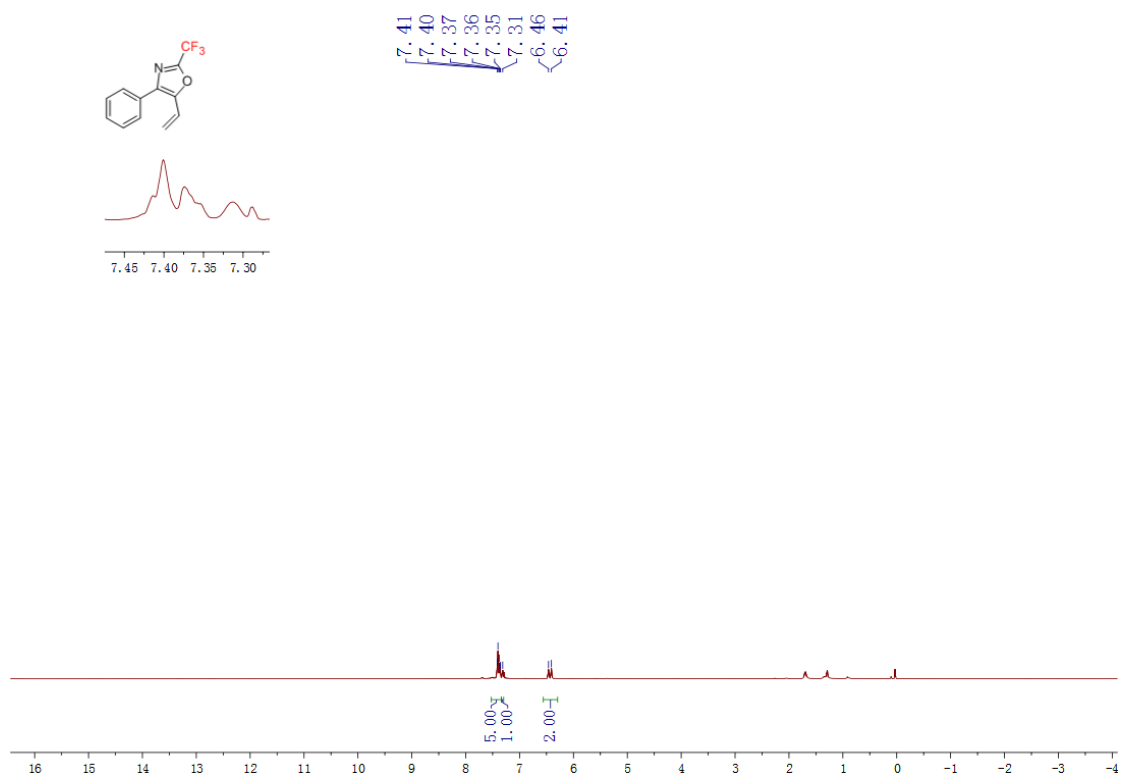



<sup>13</sup>C NMR spectrum of **3ag** in CDCl<sub>3</sub>

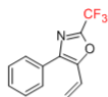

137.15  
132.26  
128.92  
128.14  
127.97  
121.47  
121.43  
121.38  
121.34  
119.78  
117.31  
116.90  
114.59  
114.03  
111.15

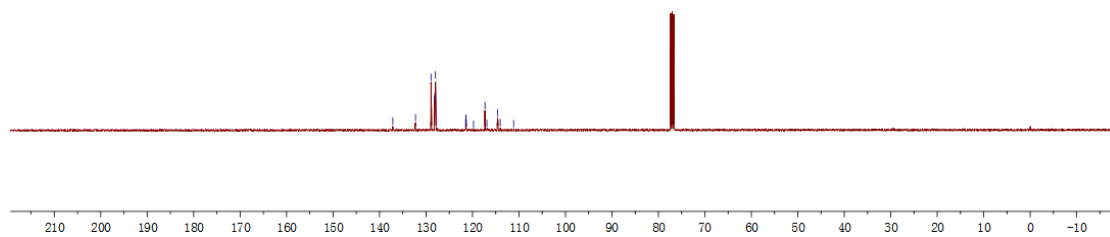

<sup>19</sup>F NMR spectrum of compound **5** in CDCl<sub>3</sub>

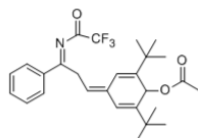

--75.14

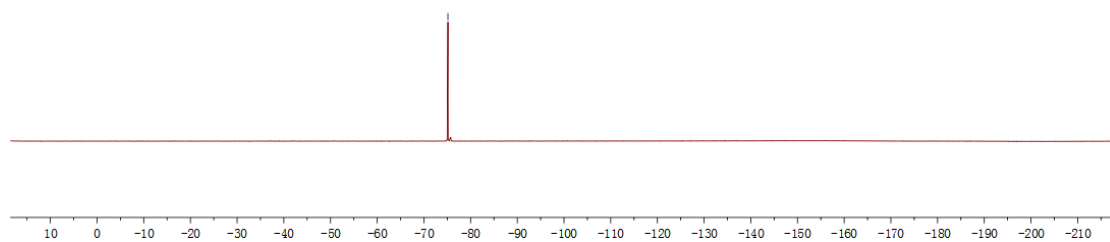

<sup>1</sup>H NMR spectrum of compound **5** in CDCl<sub>3</sub>

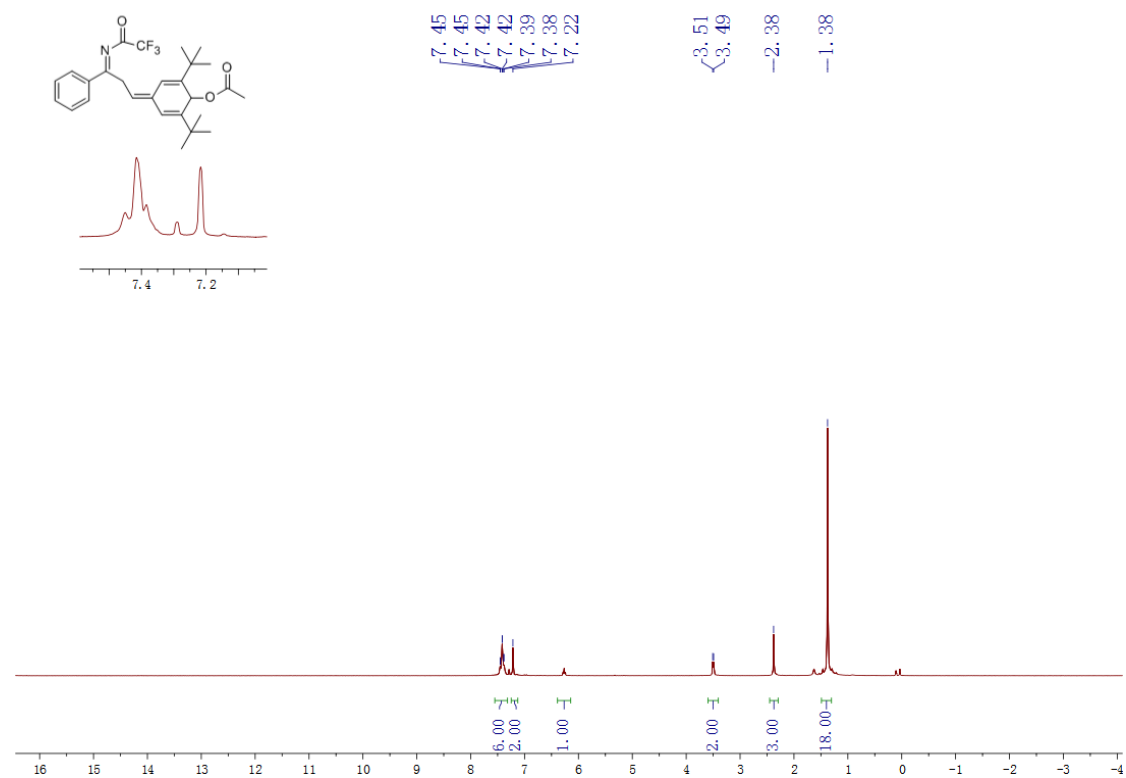

<sup>13</sup>C NMR spectrum of compound **5** in CDCl<sub>3</sub>

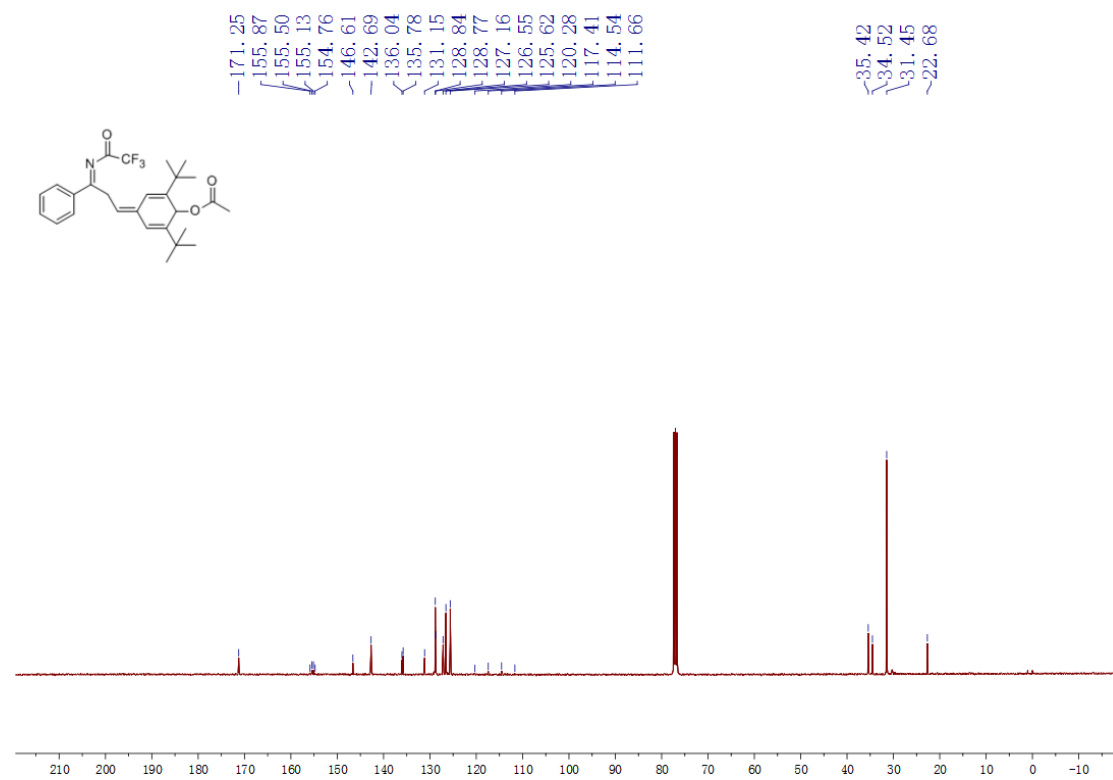

Supplement: c8cc05670f1.pdf [file c8cc05670f1.pdf]
